# Supplementary material for: Family Related Variables’ Influences on Adolescents’ Health Based on Health Behaviour in School-Aged Children Database, an AI-Assisted Scoping Review, and Narrative Synthesis
Source: Front Psychol. 2022 Aug 10;13:871795. doi: 10.3389/fpsyg.2022.871795 (PMC9400839; doi:10.3389/fpsyg.2022.871795)
Supplement: Supplementary file 2 [file Table_1.XLSX]

## Sheet: ALL
New ID	Decision	Title	Authors	Publication Year	Country	Area	Sample size	Family Variable	Measurement for family	Family role (IV/Mediator/Moderator)	Children's health outcomes	Measurements for children	Design (Sectional/Trend)	Note
4	1	Socioeconomic and behavioral determinants of tooth brushing frequency: results from the representative French 2010 HBSC cross-sectional study	de Grado, G. F., Ehlinger, V., Godeau, E., Sentenac, M., Arnaud, C., Nabet, C., Monsarrat, P.	2018	France	EU	7567	SES; Family structure; Relationships with parents; School-related parental support	FAS; Perceived family wealth; Both parents of high socio-professional category; Household composition; Communication with parents; Parental monitoring; Parental bonding; Number of children in family; School-related parental support	IV	Tooth brushing	Tooth brushing	Sectional	"relationship with parents": a composite variable
206	1	Understanding the joint effects of family and other developmental contexts on the sense of coherence (SOC): A person-focused analysis using the Classification Tree	García-Moya, I., Moreno, C., Jiménez-Iglesias, A.	2013	Spain	EU	4943	Quality of parent–child relationships	perceived emotional support; communication with parents; parental monitoring; satisfaction with family relationships	IV	Sense of coherence	Sense of coherence scale	Sectional	Quality of parent–child relationships: a composite variable
217	1	Obtaining a Hierarchy of Contextual Factors in Shaping the SOC of Male and Female Adolescents	Garcia-Moya, I., Moreno, C., Rivera, F.	2014	Spain	EU	4943	Quality of Parent–Child Relationships	emotional support; communication with parents; parental monitoring; family satisfaction	IV	Sense of coherence	Sense of coherence scale	Sectional	Quality of parent–child relationships: a composite variable
32	1	Associations of behavioural, psychosocial and socioeconomic factors with over- and underweight among German adolescents	Mikolajczyk, R. T., Richter, M.	2008	Germany	EU	5650	Family structure; SES; communication with parents	Household composition; Parents’ occupational social class ; FAS; communication with parents	IV	Underweight/overweight	BMI	Sectional	SES had two indicators: FAS and parents' OSC
6	1	Trends in adolescent overweight prevalence in Italy according to socioeconomic position	Lazzeri, G., Dalmasso, P., Berchialla, P., Borraccino, A., Charrier, L., Giacchi, M. V., Simi, R., Lenzi, M., Vieno, A., Lemma, P., Cavallo, F.	2017	Italy	EU	15035	SES	FAS	IV	Overweight	BMI	Trend	SES inequality trend
1	1	Smoking in young people with asthma	Hublet, A., De Bacquer, D., Boyce, W., Godeau, E., Schmid, H., Vereecken, C., De Baets, F., Maes, L.	2007	multiple (N=6)	EU+NA	9735	Communication with parents; Parental smoking	Communication with parents; Parental smoking	IV	Smoking	Daily smoking	Sectional
2	1	Parental knowledge and adolescent adjustment: Substance use and health-related quality of life	Jiménez-Iglesias, A., Moreno, C., Carmen Granado-Alcón, M., López, A.	2012	Spain	EU	15942	Parental monitoring; parental emotional support; Sources of parental knowledge	Perceived parental knowledge scale; Parental Bonding Inventory-Brief Current; Sources of parental knowledge	IV	Substance use; Health-related quality of life	Tobacco/Alcohol/Cannabis use frequency; KIDSCREEN-10 index questionnaire	Sectional
3	1	Parental, peer and school experiences as predictors of alcohol drinking among first and second generation immigrant adolescents in Israel	Walsh, S. D., Djalovski, A., Boniel-Nissim, M., Harel-Fisch, Y.	2014	Israel	ME	3059	SES; Communication with parents; Parental monitoring	FAS; Communication with parents; Parental monitoring	IV	Alcohol drinking	Casual drinking; Drunkenness; Binge drinking	Sectional
5	1	Mental health problems in early adolescents in the Netherlands	Vollebergh, W. A. M., van Dorsselaer, S., Monshouwer, K., Verdurmen, J., van der Ende, J., ter Bogt, T.	2006	Netherlands; Bergen; Norway (Dutch Children)	EU	7556	Immigrant status; SES; Family structure	Immigrant status; FAS; Employment status of parents ; Household composition	IV	Mental health;	YSR	Sectional
8	1	Individual and social determinants of early sexual activity: A study of gender-based differences using the 2018 Canadian Health Behaviour in School-aged Children Study (HBSC)	Gazendam, N., Cleverley, K., King, N., Pickett, W., Phillips, S. P.	2020	Canada	NA	6154	SES; Family support; Family structure	Subjective family wealth; Family support; Household composition	IV	Early Sexual Activity	Sexual activity	Sectional
9	1	Health outcomes among Swedish children: The role of social capital in the family, school and neighbourhood	Eriksson, U., Hochwälder, J., Carlsund, A., Sellström, E.	2012	Sweden	EU	3926	Communication with parents	Communication with parents	IV	Subjective health complaints; Subjective well-being	HBSC Symptoms Checklist; Subjective well-being scale	Sectional
20	1	What role do family composition and functioning play in emotional and behavioural problems among adolescent boys and girls?	Paclikova, K., Dankulincova Veselska, Z., Filakovska Bobakova, D., Palfiova, M., Madarasova Geckova, A.	2019	Slovakia	EU	2908	Family structure; Family support; Family communication; SES	Household composition; Multidimensional Scale of Perceived Social Support; family communication; FAS	IV	Internalizing and externalizing problems	Strengths and Difficulties Questionnaire	Sectional
22	1	Socioeconomic differences in emotional symptoms among adolescents in the Nordic countries: Recommendations on how to present inequality	Nielsen, L., Damsgaard, M. T., Meilstrup, C., Due, P., Madsen, K. R., Koushede, V., Holstein, B. E.	2015	multiple (N=5)	EU	29642	SES	FAS	IV	Emotional symptoms	HBSC Symptom Check List	Sectional
28	1	Overweight among students aged 11-15 years and its relationship with breakfast, area of residence and parents' education: results from the Italian HBSC 2010 cross-sectional study	Lazzeri, G., Giacchi, M. V., Spinelli, A., Pammolli, A., Dalmasso, P., Nardone, P., Lamberti, A., Cavallo, F.	2014	Italy	EU	58000	SES	Parental educational level	IV	Overweight	Cole’s classification based on BMI	Sectional
31	1	Emotional symptoms among adolescents: epidemiological analysis of individual-, classroom- and school-level factors	Meilstrup, C., Ersboll, A. K., Nielsen, L., Koushede, V., Bendtsen, P., Due, P., Holstein, B. E.	2015	Denmark	EU	4032	Family structure; Immigrant status; SES	Household composition; Migration status; Parents’ occupational social class	IV	Emotional symptoms	HBSC Symptom Check List	Sectional
33	1	Socio-demographic and lifestyle factors associated with overweight in a representative sample of 11-15 year olds in France: Results from the WHO-Collaborative Health Behaviour in School-aged Children (HBSC) cross-sectional study	Dupuy, M., Godeau, E., Vignes, C., Ahluwalia, N.	2011	France	EU	6604	SES	FAS	IV	Overweight	BMI	Sectional
34	1	Familial determinants of current smoking among adolescents of Lithuania: a cross-sectional survey 2014	Zaborskis, A., Sirvyte, D.	2015	Lithuania	EU	3696	SES; Family structure; Communication with parents; Family communication; Satisfaction with family relationships; Parental monitoring; Parental emotional support; Parental promotion of autonomy; Family time together; School-related parental support; Parenting style; Electronic media communication with parents; Seeing of parents	FAS; Household composition; Communication with parents;Short Version of Family Dynamics Measure II; Satisfaction with family relationships; Parental monitoring; Parental bonding (two-dimension); Joint family activity; School-related parental support; Parental disciplinary styles measurement; Electronic media communication with parents; Seeing of parents	IV	Smoking behaviour	Smoking behaviour	Sectional
36	1	Socioeconomic differences in adolescents' smoking: A comparison between Finland and Beijing, China	Liu, Y., Wang, M., Tynjälä, J., Villberg, J., Lv, Y., Kannas, L.	2016	Finland	EU	1685	SES	FAS	IV	Tobacco smoking	Ever smoked; Weekly smoker; Early onset of smoking	Sectional
37	1	Socioeconomic inequalities in adolescent smoking across 35 countries: A multilevel analysis of the role of family, school and peers	Moor, I., Rathmann, K., Lenzi, M., Pförtner, T. K., Nagelhout, G. E., De Looze, M., Bendtsen, P., Willemsen, M., Kannas, L., Kunst, A. E., Richter, M.	2015	multiple(N=35)	Global	52907	SES; Communication with parents; Family structure	FAS; Communication with parents; Household composition	IV	Tobacco smoking	Weekly smoking	Sectional
38	1	The role of socioeconomic status, peer and school context for adolescent smoking	Richter, M., Lampert, T.	2008	Germany	EU	5650	SES	FAS	IV	Tobacco smoking	Weekly smoking	Sectional
39	1	School connectedness and daily smoking among boys and girls: the influence of parental smoking norms	Rasmussen, M., Damsgaard, M. T., Holstein, B. E., Poulsen, L. H., Due, P.	2005	Denmark	EU	1537	Parents’ attitude toward children's future smoking; Parental smoking; SES	Parents’ attitude toward children's future smoking; Parental smoking; Parents’ employment	IV	Smoking behaviour	Daily smoking	Sectional
42	1	The effect of structural and functional social relations on smoking among adolescents - data from HBSC Greenland 2018	Hansen, S. K., Holm, L. A. B., Niclasen, B. V. L., Schnohr, C.	2020	Greenland	EU	2118	Family structure	Household composition	IV	Smoking behaviour	Smoking behaviour	Sectional
43	1	Family as a child development context and smoking behaviour among schoolchildren in Greenland	Granado Alcon, M. C., Pedersen, J. M.	2001	Greenland	EU	1648	SES; Family structure	Father's occupational social class; Household composition; Biological/broken/restructured family	IV	Smoking behaviour	Smoking frequency	Sectional
44	1	The role of behavioural factors in explaining socio-economic differences in adolescent health: A multilevel study in 33 countries	Richter, M., Erhart, M., Vereecken, C. A., Zambon, A., Boyce, W., Gabhainn, S. N.	2009	multiple(N=33)	Global	97721	SES	FAS	IV	Self-rated health; Health behaviours	Self-rated health; Substance use; Physical activities; Nutrition	Sectional
47	1	The relationship between parental socio-economic status and episodes of drunkenness among adolescents: findings from a cross-national survey	Richter, M., Leppin, A., Gabhainn, S. N.	2006	multiple(N=28)	EU+NA	142868	SES	parents' occupational level; FAS	IV	Drunkenness	Drunkenness	Sectional
48	1	School-related mediators in social inequalities in smoking: a comparative cross-sectional study of 20,399 adolescents	Schnohr, C. W., Kreiner, S., Rasmussen, M., Due, P., Diderichsen, F.	2009	multiple(N=32)	Global	20339	SES	FAS	IV	Smoking behaviour	Daily smoking	Sectional
51	1	Family Social Environment and Parenting Predictors of Alcohol Use among Adolescents in Lithuania	Sumskas, L., Zaborskis, A.	2017	Lithuania	EU	3715	Family structure; SES; Satisfaction with family relationships; Communication with parents; Parental monitoring; Family communication; school-related parental support; Parental emotional support; Parenting style; Family activity; Electronic media communication with parents; Seeing parents	Household composition; FAS; Satisfaction with family relationships; Communication with parents; Parental monitoring; Quality of communication with family; school-related parental support; Parental emotional support; Parenting style; Family time together; Electronic media communication with parents; Seeing parents	IV	Weekly alcohol use	Weekly alcohol use	Sectional
52	1	Alcohol consumption in early adolescence: Associations with sociodemographic and psychosocial factors according to gender	Pedroni, C., Dujeu, M., Lebacq, T., Desnouck, V., Holmberg, E., Castetbon, K.	2021	Belgium	EU	4364	Family support; family structure; SES	Multidimensional Scale of Perceived Social Support; Household composition; FAS	IV	Alcohol consumption	Daily alcohol consumption	Sectional
53	1	Adolescents’ drinking and drunkenness more likely in one-parent families and due to poor communication with mother	Tomčíková, Z., Dankulincová Veselská, Z., Madarasová Gecková, A., van Dijk, J. P., Reijneveld, S. A.	2015	Slovakia	EU	3882	Communication with Parents; Family Composition	Communication with Parents; Household composition	IV	Frequent Alcohol Drinking; Lifetime Drunkenness	Frequency of alcohol drinking; Lifetime Drunkenness	Sectional
54	1	Socio-economic inequality in multiple health complaints among adolescents: international comparative study in 37 countries	Holstein, B. E., Currie, C., Boyce, W., Damsgaard, M. T., Gobina, I., Kokonyei, G., Hetland, J., de Looze, M., Richter, M., Due, P., Grp, Hbsc Social Inequalities Focus	2009	multiple(N=37)	Global	204573	SES	FAS	IV	Subjective health complaints	HBSC Symptom Check List	Sectional
56	1	Greenlandic family structure and communication with parents: influence on schoolchildren's drinking behaviour	del Carmen, M., Alcón, G., Pedersen, J. M., María, A., González, C.	2002	Greenland	EU	1648	SES; Family structure; communication with parents	parents' occupational level; Household composition; communication with parents	IV	Alcohol consumption	Alcohol consumption	Sectional
58	1	EXPERIENCE OF CZECH CHILDREN WITH ALCOHOL CONSUMPTION IN RELATION TO SELECTED FAMILY INDICATORS	Hodacova, L., Smejkalova, J., Cermakova, E., Kalman, M.	2017	Czech	EU	4293	Family structure; family activity; communication with parents	Household composition; time with family; communication with parents	IV	alcohol consumption; experience of drunkenness	alcohol consumption; experience of drunkenness	Sectional
59	1	Trends in social inequalities in adolescent health complaints from 1994 to 2010 in Europe, North America and Israel: The HBSC study	Moor, I., Richter, M., Ravens-Sieberer, U., Ottova-Jordan, V., Elgar, F. J., Pfortner, T. K.	2015	multiple(N=37)	Global		SES	subjective family wealth	IV	Subjective health complaints	HBSC Symptom Check List	Trend
62	1	Psychosocial and behavioural factors in the explanation of socioeconomic inequalities in adolescent health: a multilevel analysis in 28 European and North American countries	Moor, I., Rathmann, K., Stronks, K., Levin, K., Spallek, J., Richter, M.	2014	multiple(N=28)	EU+NA	117460	SES; communication with parents	FAS; communication with parents	IV	Self-rated health	Self-rated health	Sectional
63	1	Breakfast frequency among adolescents: associations with measures of family functioning	Pedersen, T. P., Holstein, B. E., Damsgaard, M. T., Rasmussen, M.	2016	Denmark	EU	3054	SES; communication with parents; family communication; family support	communication with parents; Quality of family communication; family support; parents' occupational social class; migration status; household composition	IV	Breakfast consumption	Breakfast consumption during weekdays	Sectional
64	1	Explaining socioeconomic differences in adolescent self-rated health: the contribution of material, psychosocial and behavioural factors	Richter, M., Moor, I., van Lenthe, F. J.	2012	Germany	EU	7274	SES; School-related parental support	FAS; subjective family wealth; school-related parental support	IV	Self-rated health	Self-rated health	Sectional
67	1	Associations between family structure and adolescents' food habits	Fismen, A. S., Smith, O. R. F., Samdal, O., Helleve, A., Haug, E.	2020	Norway	EU	4475	Family structure; SES	household compostion; siblings; FAS	IV	Food habits	vegetables/sweets/sugar-added soft drinks consumption	Sectional
68	1	Trends in adolescent eating behaviour: a multilevel cross-sectional study of 11-15 year olds in Scotland, 2002-2010	Levin, K. A., Kirby, J., Currie, C., Inchley, J.	2012	Scotland	EU	16368	SES; family structure	FAS; household composition	IV	Eating behaviour	fruit/vegetables/sweets/crisps/chips consumption	Sectional
69	1	The influence of family structure on breakfast habits among adolescents	Jorgensen, A., Pedersen, T. P., Meilstrup, C. R., Rasmussen, M.	2011	Denmark	EU	6269	Family structure; SES	Household compostion; Parents' occupational social class	IV	Breakfast consumption	Breakfast consumption during weekdays	Sectional
71	1	Inequalities in Croatian pupils' unhealthy behaviours and health outcomes: role of school, peers and family affluence	Simetin, I. P., Kuzman, M., Franelic, I. P., Pristas, I., Benjak, T., Dezeljin, J. D.	2011	Crotia	EU	3296	SES	FAS	IV	Unhealthy behaviours; health outcomes	smoking; drunkenness; physical inactivity; irregular breakfast; soft drink consumption; self-rated health; health complaints; life satisfaction	Sectional
73	1	Factors associated with unhealthy behaviours and health outcomes: a cross-sectional study among tuscan adolescents (Italy)	Lazzeri, G., Azzolini, E., Pammolli, A., Simi, R., Meoni, V., Giacchi, M. V.	2014	Italy	EU	3291	SES	FAS	IV	unhealthy behaviour; health outcomes	smoking; alcohol consumption; physical inactivity; sedentary lifestyle; irregular breakfast consumption; subjective health complaints; self-reported health; life satisfaction	Sectional
75	1	Socioeconomic Inequalities in Health among Armenian Adolescents	Torchyan, A. A., Bosma, H.	2020	Armenia	ME	3679	SES	subjective family wealth; FAS	IV	Perceived health status; Psychosocial well-being ; psychosomatic symptoms	self-rated health; Cantril Ladder wellbeing scale; HBSC Symptom Check List	Sectional
76	1	Family, School and Health in Children and Adolescents Findings from the 2006 HBSC Study in Greece	Karademas, E. C., Peppa, N., Fotiou, A., Kokkevi, A.	2008	Greece	EU	3034	communication with parents; Parental monitoring; parental emotional support	communication with parents; Parental monitoring; parental emotional support	IV	Subjective health and well-being	self-rated health; satisfaction; HBSC Symptom Checklist with life	Sectional
79	1	Adolescent risk behaviours and mealtime routines: does family meal frequency alter the association between family structure and risk behaviour?	Levin, K. A., Kirby, J., Currie, C.	2012	Scotland	EU	4257	Family structure; family meals	Household composition; family mealtime	IV	Health risk behaviour	Substance use; sex	Sectional
80	1	Perceived Quality of Social Relations and Frequent Drunkenness: A Cross-Sectional Study of Spanish Adolescents	Kjaerulff, T. M., Rivera, F., Jimenez-Iglesias, A., Moreno, C.	2014	Spain	EU	2303	Parental monitoring; Satisfaction with the family	parental monitoring; Satisfaction with the family	IV	Frequent drunkenness	Frequent drunkenness	Sectional
81	1	Lack of parental rule-setting on eating is associated with a wide range of adolescent unhealthy eating behaviour both for boys and girls	Holubcikova, J., Kolarcik, P., Madarasova Geckova, A., Van Dijk, J. P., Reijneveld, S. A.	2016	Slovakia	EU	2765	Eating-related parental rules; SES	Eating-related parental rules; subjective family wealth; Parents' education	IV	Eating Habits	Breakfast habit; Fruit/vegetables/sweets/Soft drinks/energy drinks consumption;	Sectional
82	1	Socio-economic position and adolescents' health in Italy: the role of the quality of social relations	Zambon, A., Lemma, P., Borraccino, A., Dalmasso, P., Cavallo, F.	2006	Italy	EU	4386	SES; Communication with parents	FAS; communication with parents	IV	health behaviours	smoking; alcohol use; frequency of physical activity; cannabis use.	Sectional
84	1	How family socioeconomic status, peer behaviors, and school-based intervention on healthy habits influence adolescent eating behaviors	Moreno-Maldonado, C., Ramos, P., Moreno, C., Rivera, F.	2018	Spain	EU	6851	SES	Parental educational level; Parental employment; FAS	IV	Eating Habits	Breakfast/fruit/sweets/Soft drinks consumption	Sectional
86	1	Diet-Related Behaviors and Diet Quality among School-Aged Adolescents Living in Greece	Benetou, V., Kanellopoulou, A., Kanavou, E., Fotiou, A., Stavrou, M., Richardson, C., Orfanos, P., Kokkevi, A.	2020	Greece	EU	3525	SES	FAS	IV	Diet Quality Score	consumptions of fruits, vegetables/salads, sweets (including chocolates and candies), sugar-sweetened beverages, coffee, and energy drinks	Sectional
89	1	Mental health inequalities in Slovenia 15-year-old adolescents explained by personal social position and family socioeconomic status	Klanšček, H. J., Žiberna, J., Korošec, A., Zurc, J., Albreht, T.	2014	Slovenia	EU	1644	SES	subjective family wealth; FAS; parental employment; family structure; personal social position	IV	Mental health	KIDSCREEN-10; Feelings of depression; Life satisfaction; The Strengths and Difficulties Questionnaire	Sectional
93	1	Contributing factors in adolescents’ mental well-being—the role of socioeconomic status, social support, and health behavior	Nagy-Pénzes, G., Vincze, F., Bíró, É	2020	Hungary	EU	253	SES	Parental educational level; subjective family wealth; FAS	IV	Life Satisfaction; Depression; Psychosomatic Symptoms	Life Satisfaction; Child Depression Inventory; HBSC Symptom Checklist	Sectional
94	1	Adolescent Weight Status: Associations With Structural and Functional Dimensions of Social Relations	Kjelgaard, H. H., Holstein, B. E., Due, P., Brixval, C. S., Rasmussen, M.	2017	Denmark	EU	4922	communication with parents	communication with parents	IV	overweight	BMI	Sectional
96	1	The relationship between body mass index and unhealthy weight control behaviors among adolescents: The role of family and peer social support	Vander Wal, J. S.	2012	US	NA	4598	communication with parents; school-related parental support; Communication with siblings	communication with parents; school-related parental support; Communication with siblings	IV	Unhealthy weight control behaviors;Possible disordered eating behavior	Unhealthy weight control behaviors;Possible disordered eating behavior	Sectional
97	1	The Effects of Family Structure on Consumption and Exercise Patterns for Adolescent Youth	Yelick, A.	2017	US	NA	7447	Family structure	household composition	IV	consumption pattern; exercise pattern	consumptions of breakfast/fruits/vegetables/soft drinks/fast food; physical exercise frequency; MVPA	Sectional
98	1	An investigation of the impact of family dynamics on obesity among African American adolescent girls	McDyess, Tina D.	2018	US	NA	806	SES; family structure; Parental promotion of autonomy; Parental emotional support	FAS; Household compostion; perceived parental promotion of autonomy;Parental emotional support	IV	Obesity	BMI	Sectional
99	1	Psychosocial factors of different health behaviour patterns in adolescents: Association with overweight and weight control behaviours	Veloso, S. M., Matos, M. G., Carvalho, M., Diniz, J. A.	2012	Portugual	EU	3069	satisfaction with family relationships; communication with parents;	satisfaction with family relationships; communication with parents;	IV	Health Behaviours	physical activity; sedentary behaviours	Sectional
100	1	Gender-specific substance use patterns and associations with individual, family, peer, and school factors in 15-year-old Portuguese adolescents: A latent class regression analysis	Picoito, J., Santos, C., Loureiro, I., Aguiar, P., Nunes, C.	2019	Portugual	EU	1553	SES; family structure; communication with parents	FAS; household compostion; communication with parents	IV	use of alcohol, tobacco; drunkenness	use of alcohol, tobacco; drunkenness	Sectional
101	1	Associations between socioeconomic and family determinants and weight-control behaviours among adolescents	Tur-Sinai, A., Kolobov, T., Tesler, R., Baron-Epel, O., Dvir, K., Harel-Fisch, Y.	2020	Israel	ME	4390	SES; communication with parents; family support; parental monitoring; family meals	FAS; subjective family wealth; communication with parents; family support; parental monitoring; family meal	IV	Weight-control behaviours	Weight-control behaviours	Sectional
102	1	Individual and environmental predictors of health risk behaviours among Dutch adolescents: The HBSC study	Harakeh, Z., De Looze, M. E., Schrijvers, C. T. M., van Dorsselaer, S. A. F. M., Vollebergh, W. A. M.	2012	Netherlands	EU	1742	SES; communication with parents; parental monitoring; alcohol drinking-related parental rules	FAS; communication with parents; mother's monitoring; Parental rules on alcohol drinking	IV	Health risk behaviour	Tobacco smoking; binge drinking; cannabis smoking; early sexual intercours	Sectional
104	1	Parent-child communication and substance use among adolescents: Do father and mother communication play a different role for sons and daughters?	Luk, J. W., Farhat, T., Iannotti, R. J., Simons-Morton, B. G.	2010	US	NA	1308	Communication with parents	Communication with mother; Communication with father	IV	Substance Use	cigarette smoking; alcohol drinking	Sectional
106	1	The Associations between Family-Related Factors and Excessive Internet Use in Adolescents	Faltynkova, A., Blinka, L., Sevcikova, A., Husarova, D.	2020	Slovakia	EU	2547	SES; family structure; parental emotional support; Parental promotion of autonomy; Parental monitoring ; Family activity; communication with parents	Subjective family wealth; Household compostion; Parental Bonding Instrument; Parental monitoring; Family activities; communication with parents	IV	Excessive Internet Use	Excessive Internet Use scale	Sectional
115	1	Adolescent substance abuse, the importance of family, school and peers: data from the health behaviour in school children	Jovic-Vranes, A. S., Vranes, B., Marinkovic, J., Cucic, V.	2005	Serbia	EU	1540	Family structure; communication with parents	Household composition; communication with parents	IV	Substance Use	alcohol consumption; drug use;	Sectional
116	1	Protective factors of substance use in youth subcultures	Bobakova, D., Geckova, A. M., Klein, D., Reijneveld, S. A., van Dijk, J. P.	2012	Slovakia	EU	1605	Parental monitoring; Parental emotional support; Parental substance use	Parental monitoring; Emotional support from parents; Parental tobacco/alcohol/drug use	IV	Substance Use	smoking cigarettes; drinking alcohol; drunkenness; cannabis use	Sectional
118	1	Clustering of health-related behaviours and its relationship with individual and contextual factors in Portuguese adolescents: results from a cross-sectional study	dos Santos, C. S., Picoito, J., Loureiro, I., Nunes, C.	2020	Portugual	EU	4036	SES; Family structure;Family communication	FAS; Household composition; communication with parents	IV	Health behaviours	physical activity; eating habit; substance use	Sectional
120	1	Adolescents, family status, education and health: New insights into health behaviour in school-aged children in Portugal	Gaspar de Matos, Margarida, Borges, Antonio, Capucha, Luis	2011	Portugual	EU	4877	SES	FAS; Parental eduational level	IV	Health-related quality of life; Life satisfaction	KIDSCREEN-10; Life satisfaction scale	Sectional
122	1	Social capital does matter for adolescent health: evidence from the English HBSC study	Morgan, A., Haglund, B. J. A.	2009	England	EU	6425	SES; Family activity; Parental emotional support; Parental promotion of autonomy	FAS; Family activities; Parental control	IV	Self-reported health; physical activity; smoking; drinking	Self-reported health; physical activity; smoking; drinking	Sectional
124	1	Social capital and adolescent smoking in schools and communities: A cross-classified multilevel analysis	De Clercq, B., Pfoertner, T. K., Elgar, F. J., Hublet, A., Maes, L.	2014	Belgium Flanders	EU	8453	Parental smoking; SES; School-related parental support	Parental smoking; FAS; School-related support	IV	Smoking	Smoking frequency	Sectional
125	1	Cross-national evidence for the clustering and psychosocial correlates of adolescent risk behaviours in 27 countries	de Looze, M., ter Bogt, T. F. M., Raaijmakers, Q. A. W., Pickett, W., Kuntsche, E., Vollebergh, W. A. M.	2015	multiple(N=27)	EU+NA	56090	Communication with parents	Communication with parents	IV	Health risk behaviours	substance use; sexual activity	Sectional
126	1	Adolescents' sleep quality in relation to peer, family and school factors: findings from the 2017/2018 HBSC study in Flanders	Delaruelle, K., Dierckens, M., Vandendriessche, A., Deforche, B., Poppe, L.	2021	Belgium Flanders	EU	8153	SES; Family structure; Family support	Parental eduation; subjective family wealth; Household composition; Family support;	IV	sleep quality	sleep quality scale	Sectional
127	1	Substance use in Portuguese and Spanish adolescents: Highlights from differences, similarities and moderating effects	Simões, C., Matos, M. G., Moreno, C., Rivera, F., Batista-Foguet, J. M., Simons-Morton, B.	2012	multiple(N=2)	EU	5780	Communication with parents	Communication with parents	IV	Substance Use	tobacco/alcohol/cannabis use	Sectional
129	1	Social support and family communication as factors protecting adolescents against multiple recurrent health complaints related to school stress	Tabak, I., Mazur, J.	2016	Poland	EU	4432	SES; Family communication; Family support	FAS;Family Dynamics Measure; Family support	IV	subjective health complaints	HBSC Symptom Checklist	Sectional
130	1	Parent, school, and peer factors related to US adolescents' diet and exercise	Chung, S. J., Ersig, A. L., McCarthy, A. M.	2018	US	NA	5248	Family structure; communication with parents; parental monitoring	Household composition; communication with parents; parental monitoring	IV	Eating behaviour	breakfast and soft drink consumption	Sectional
131	1	Investigating Cannabis Use Normalization by Distinguishing Between Experimental and Regular Use: A Multilevel Study in 31 Countries	Sznitman, S. R., Kolobov, T., ter Bogt, T., Kuntsche, E., Walsh, S. D., Harel-Fisch, Y.	2015	multiple(N=31)	Global	62009	communication with parents	communication with parents	IV	Cannabis use	Cannabis use	Sectional
132	1	Associations between Finnish 9th grade students' school perceptions, health behaviors, and family factors	Ilona, Haapasalo, Raili, Välimaa, Lasse, Kannas	2012	Finland	EU	1670	Parental bonding; Parental monitoring; SES	Parental bonding; Parental monitoring; subjective family wealth	IV	Health behaviours	smoking; alcohol use; physical activity; breakfast consumption; sleep	Sectional
134	1	Parental educational level and psychological positive health and health complaints in Spanish children and adolescents	Padilla-Moledo, C., Ruiz, J. R., Castro-Piñero, J.	2016	Spain	EU	685	SES	Parental educational level	IV	Psychological positive health; Health complaints	Perceived health status; Life satisfaction; HBSC symptom Checklist	Sectional
140	1	The role of individual and macro-level social determinants on young adolescents' psychosomatic complaints	Ottova, V., Erhart, M., Vollebergh, W., Kökönyei, G., Morgan, A., Gobina, I., Jericek, H., Cavallo, F., Välimaa, R., de Matos, M. G., Gaspar, T., Schnohr, C. W., Ravens-Sieberer, U.	2012	multiple(N=34)	EU	98773	communication with parents; family structure; SES	communication with parents; family structure; FAS	IV	Psychosomatic complaints	HBSC symptom checklist	Sectional
142	1	What is worse? A hierarchy of family-related risk factors predicting alcohol use in adolescence	Kuntsche, E. N., Kuendig, H.	2006	Switzerland	EU	3127	Family Structure; Family drinking; Family communication; Family activity; Family support	Family Structure; Perception of excessive drinking in the family; Family communication; Family activity; Family support	IV	alcohol use	Frequency of alcoholic beverage intake; drunkenness	Sectional
144	1	Physical and social factors associated with early adolescent headache and stomachache pain	Fife, B., Forste, R.	2018	US	NA	12070	parental monitoring; satisfaction with the family relationships	parental monitoring; Satisfaction with the family	IV	headache; stomachache	HBSC Symptom Checklist	Sectional
145	1	Family-related school issues and the mental health of adolescents: Post hoc analyses of the Portuguese national health behaviour in school-aged children survey data	Matos, M. G., Dadds, M. R., Barrett, P. M.	2006	Portugual	EU	5326	Communcation with parents; School-related parental support; SES	Communcation with parents; School related parental support; Father’s occupational social class	IV	Anxiety/Depression; Physical Health	HBSC Symptom Checklist; Self-rated health; Depression	Sectional
147	1	Peer, family integration and other determinants of cannabis use among teenagers	Kohn, L., Kittel, F., Piette, D.	2004	Belgium French	EU	744	Communication with parents; SES	Communication with parents; number of subjects contributing to family income	IV	Substance Use	Tobacco/alcohol/drug use	Sectional
149	1	Social class variation in medicine use among adolescents	Holstein, B. E., Hansen, E. H., Due, P.	2004	Denmark	EU	5205	SES	parents’ occupational status	IV	Use of medicine		Sectional
152	1	Prevalence and familial predictors of suicidal behaviour among adolescents in Lithuania: a cross-sectional survey 2014	Zaborskis, A., Sirvyte, D., Zemaitiene, N.	2016	Lithuania	EU	2542	SES; Family structure; Family communication; Satisfaction with family relationships; Parental monitoring; Emotional support; School-related parental support; Parenting style; Family activity; Electronic media communication with parents; Seeing the parents	FAS; Household composition; Communication with Parents; Family Dynamics Measure; Satisfaction with family relationships; Parental monitoring; Parental bonding; parental disciplinary styles; Family activities; Electronic media communication with parents; Seeing the parents	IV	Suicide and self-harm	Youth Risk Behaviour Survey	Sectional
154	1	Does social capital travel? Influences on the life satisfaction of young people living in England and Spain	Morgan, A. R., Rivera, F., Moreno, C., Haglund, B. J. A.	2012	multiple(N=2)	EU	3591	Family activity; Parental promotion of autonomy; parental emotional support	Family activities; Parental Autonomy and Control; Parental social support	IV	Life satisfaction	Life satisfaction item	Sectional
155	1	Subjective health complaints among boys and girls in the Swedish HBSC study: Focussing on parental foreign background	Carlerby, H., Viitasara, E., Knutsson, A., Gillander Gådin, K.	2011	Sweden	EU	11268	Immigrant Status; SES; Family Structure	Parental Immigrant Status; FAS; Household composition	IV	Subjective health complaints	HBSC Symptoms Checklist	Sectional
156	1	Relative deprivation and risk factors for obesity in Canadian adolescents	Elgar, F. J., Xie, A., Pförtner, T. K., White, J., Pickett, K. E.	2016	Canada	NA	25311	SES	Subjective family wealth; School-level absolute deprivation based on FAS; Yitzhaki index based on FAS	IV	lifestyle risk factors of obesity	Breakfasts; Physical activity; Healthful food choices; Unhealthful food choices	Sectional
159	1	Young People Living with Unemployed Parents during a Labour Market-Crisis: How Do Portugal and Scotland Compare?	Frasquilho, D., de Matos, M. G., Currie, C., Neville, F., Whitehead, R., Gaspar, T., de Almeida, J. M. C.	2017	multiple(N=2)	EU	7260	SES	Parental employment	IV	Subjective health complaints; Life satisfaction	HBSC Symptoms Checklist; Life satisfaction	Sectional
160	1	Relative deprivation and episodes of drunkenness among French and Canadian adolescents	Sentenac, M., Ehlinger, V., Napoletano, A., Spilka, S., Gariepy, G., Godeau, E., Elgar, F. J.	2017	multiple(N=3)	EU+NA	5901	SES	sum of FAS; Group-mean centred deprivation; Rank in the deprivation distribution; Yitzhaki index based on FAS; School-level affluence based on FAS	IV	Drunkenness	Drunkenness	Sectional
161	1	Mental well-being and subjective health of 11- to 15-year-old boys and girls in Scotland, 1994-2006	Levin, K. A., Currie, C., Muldoon, J.	2009	Scotland	EU	19393	Family structure; SES	Household composition; Family affluence	IV	Mental wellbeing	Happiness; Confidence; Helplessness; Feeling of Left out; Multiple Health Complaints	Trend
163	1	Risk behaviour, parental background, and wealth: A cluster analysis among Swedish boys and girls in the HBSC study	Carlerby, H., Viitasara, E., Knutsson, A., Gådin, K. G.	2012	Sweden	EU	11972	Immigrant Status; SES	Parental Immigrant Status; FAS	IV	Drunkenness; Smoking; Physical activity; Wish to lose weight; Inadequate tooth brushing; Vegetables and soft-drink consumption	Drunkenness; Smoking; Physical activity; Wish to lose weight; Inadequate tooth brushing; Vegetables and soft-drink consumption	Sectional
166	1	Trends from 2002 to 2010 in Daily Breakfast Consumption and its Socio-Demographic Correlates in Adolescents across 31 Countries Participating in the HBSC Study	Lazzeri, G., Ahluwalia, N., Niclasen, B., Pammolli, A., Vereecken, C., Rasmussen, M., Pedersen, T. P., Kelly, C.	2016	multiple(N=31)	EU+NA	455391	SES; Family Structure	FAS; Household compostion	IV	Daily breakfast consumption	Daily breakfast consumption	Trend
167	1	Breakfast consumption and its socio-demographic and lifestyle correlates in schoolchildren in 41 countries participating in the HBSC study	Vereecken, C., Dupuy, M., Rasmussen, M., Kelly, C., Nansel, T. R., Al Sabbah, H., Baldassari, D., Jordan, M. D., Maes, L., Niclasen, B. V. L., Ahluwalia, N., Mager, U., de Smet, P., Alexandrova, A., Janssen, I., Krch, F., Maser, M., Ojala, K., Niclassen, B., Németh, Á, Giacchi, M., Dalmasso, P., Rossi, S., Lazzeri, G., Pudule, I., Kololo, H., Craciun, C., Szentagotai, A., Baskova, M., Delgrande, …	2009	multiple(N=41)	EU+NA	204534	SES; Family Structure	FAS; Household compostion	IV	Daily breakfast consumption	Daily breakfast consumption	Sectional
169	1	Associations between family structure and young people's physical activity and screen time behaviors	Langoy, A., Smith, O. R. F., Wold, B., Samdal, O., Haug, E. M.	2019	Norway	EU	4475	Family structure; SES	Household composition; FAS	IV	Moderate to vigorous physical activity; Organized sport; Screen-based behaviors	Moderate to vigorous physical activity; Organized sport; Screen-based behaviors	Sectional
170	1	Association between potential parental and peers' correlates and physical activity recommendations compliance among 13-16 years old adolescents	Bakalar, P., Kopcakova, J., Geckova, A. M.	2019	Slovakia	EU	3012	Parental physical activity; Family activity	Parental physical activity; Family physical activity	IV	Moderate to vigorous physical activity; Organized sport; Screen-based behaviors	Moderate to vigorous physical activity; Organized sport; Screen-based behaviors	Sectional
171	1	Family structure and children's living conditions. A comparative study of 24 countries	Låftman, S. B.	2010	multiple(N=24)	Global	90808	Family structure; communication with parents	Household composition; communication with parents	IV	Health complaints; self-rated health	HBSC Symptom Checklist; self-rated health	Sectional
172	1	Self-harm in adolescence: protective health assets in the family, school and community	Klemera, E., Brooks, F. M., Chester, K. L., Magnusson, J., Spencer, N.	2017	England	EU	1521	Communication with parents; family activity; Parental promotion of autonomy; Family support	Communication with parents; family activites; Personal autonomy in relation to family; Family support	IV	Self-harm	Self-harm	Sectional
176	1	Psychosomatic symptoms among schoolchildren	Kelly, C., Molcho, M., Doyle, P., Gabhainn, S. N.	2010	Ireland	EU	9969	SES	FAS	IV	Psychosomatic symptom	HBSC symptom Checklist	Sectional
177	1	Influence on self-rated health of socio-demographic, lifestyle and affluence factors: an analysis of the Irish and International Health Behaviours Among School-Aged Children (HBSC) datasets 1998	Kelleher, C. C., Tay, J., Gabhainn, S. N.	2007	Ireland and Global(N=15)	Ireland and Global	115327	SES; Communication with parents	FAS; Communication with parents	IV	self rated health	self rated health	Sectional
179	1	Suicidal ideation and behaviors within the school context: Perceived teacher, peer and parental support	Madjar, N., Walsh, S. D., Harel-Fisch, Y.	2018	Israel	ME	4242	School-related parental support	School-related parental support	IV	Suicide ideation and behaviours	Youth Risk Survelliance System	Sectional
180	1	Interpersonal relationships as predictors of positive health among Irish youth: the more the merrier?	Molcho, M., Gabhainn, S. N., Kelleher, C. C.	2007	Ireland	EU	8424	Family communications	Communcation with parents and siblings	IV	physical/emotional symptoms; Life satisfaction; positive life; happiness	HBSC Symptom Checklist; Life satisfaction; Wellbeing scale; General lifer happiness	Sectional
181	1	Inequalities in toothbrushing among adolescents in Scotland 1998-2006	Levin, K. A., Currie, C.	2009	Scotland	EU	15460	Family structure; SES; parental monitoring	Household composition; FAS	IV	toothbrushing	toothbrushing	Sectional
182	1	Characterization of Resilient Adolescents in the Context of Parental Unemployment	Moreno-Maldonado, C., Jimenez-Iglesias, A., Rivera, F., Moreno, C.	2020	Spain	EU	908	SES; Family structure; Family support; Satisfaction with family relationships	Parental educational level; subjective family wealth; Household composition; Family support; Family satisfaction	IV	Global Health Score	life satisfaction; heath-related quality of life; self-reported health	Sectional
185	1	Sexual behaviour in 15-year-old adolescents: Insights into the role of family, peer, teacher, and classmate support	Borraccino, A., Lo Moro, G., Dalmasso, P., Nardone, P., Donati, S., Berchialla, P., Charrier, L., Lenzi, M., Spinelli, A., Lemma, P.	2020	Italy	EU	18918	Family structure; family support	Household composition; Family support	IV	Early sexual intercourse	Sexual intercourse	Sectional
187	1	Suicidal Ideation, Risk Factors, and Communication With Parents An HBSC Study on School Children in Estonia, Lithuania, and Luxembourg	Mark, L., Samm, A., Tooding, L. M., Sisask, M., Aasvee, K., Zaborskis, A., Zemaitiene, N., Varnik, A.	2013	multiple(N=3)	EU	4954	Communication with Parents	Communication with Parents	IV	suicidal ideation	suicidal ideation	Sectional
188	1	Self-Reported Oral Health Related Behaviour and Gum Bleeding of Adolescents in Slovakia in Relation to Socioeconomic Status of Their Parents: Cross-Sectional Study Based on Representative Data Collection	Timkova, S., Kolarcik, P., Geckova, A. M.	2019	Slovakia	EU	5074	SES	Family affluence; parental educational level; parental employment	IV	oral health promoting behaviour; oral health	Dental hygiene; Toothbrush changing; Preventive dental check-up; Gum bleeding	Sectional
191	1	Revisiting Factors Associated With Screen Time Media Use: A Structural Study Among School-Aged Adolescents	Ngantcha, M., Janssen, E., Godeau, E., Ehlinger, V., Le-Nezet, O., Beck, F., Spilka, S.	2018	France	EU	10434	SES	FAS	IV	Screening time	Screening time	Sectional
193	1	Socioeconomic Effects on Meeting Physical Activity Guidelines: Comparisons among 32 Countries	Borraccino, A., Lemma, P., Iannotti, R. J., Zambon, A., Dalmasso, P., Lazzeri, G., Giacchi, M., Cavallo, F.	2009	multiple(N=32)	Global	160976	SES	FAS	IV	Physical activity; Sedentary behaviors	Physical activity; Sedentary behaviors	Sectional
194	1	Protective and risk factors of early sexual initiation in youth subcultures	Bobakova, D., Geckova, A. M., Klein, D., van Dijk, J. P., Reijneveld, S. A.	2013	Slovakia	EU	1380	Parental monitoring; Parental bonding	Parental monitoring; Parental bonding;	IV	early sexual intercourse	Sexual intercourse	Sectional
195	1	Parent-Child Relationships and Adolescents' Life Satisfaction Across the First Decade of the New Millennium	Jimenez-Iglesias, A., Garcia-Moya, I., Moreno, C.	2017	Spain	EU	46593	Parental emotional support; Communication with parents; Parental monitoring; family activity	Parental Bonding Instrument–Brief Current form ; Communication with parents; Parental monitoring; family activities	IV	Life satisfaction	Life satisfaction	Trend
196	1	Gender and Age Differences in Social Inequality on Adolescent Life Satisfaction: A Comparative Analysis of Health Behaviour Data from 41 Countries	Zaborskis, A., Grincaite, M.	2018	multiple(N=41)	Global	192718	Family structure; SES	household composition; FAS	IV	Life satisfaction	Life satisfaction	Sectional
199	1	Factors associated with life satisfaction of adolescents living with employed and unemployed parents in Spain and Portugal: A person focused approach	Moreno-Maldonado, C., Jimenez-Iglesias, A., Camacho, I., Rivera, F., Moreno, C., Matos, M. G.	2020	multiple(N=2)	EU	21081	Satisfaction with family relationships; SES	family satisfaction; Parental employment status	IV	Life satisfaction	Life satisfaction	Sectional
202	1	Analysis of the importance of family in the development of sense of coherence during adolescence	García Moya, I., Moreno, C., Jiménez Iglesias, A., Rivera, F., Lindström, B.	2012	Spain	EU	7580	SES; parental emonitional support ; Parental monitoring; Communication with parents; Satisfaction with relationship between parents; Family activity	Family affluence; Parental Bonding Instrument ; Parental monitoring; Communication with parents; Quality of the relationship between parents; Frequency of family activities	IV	Sense of Coherence	Sense of coherence scale	Sectional
205	1	Social Inequality in Adolescent Life Satisfaction: Comparison of Measure Approaches and Correlation with Macro-level Indices in 41 Countries	Zaborskis, A., Grincaite, M., Lenzi, M., Tesler, R., Moreno-Maldonado, C., Mazur, J.	2019	multiple(N=41)	Global	192718	SES; family structure	FAS; Household composition	IV	Life satisfaction	Life satisfaction	Sectional
209	1	Life Satisfaction, Physical Activity and Quality of Life Associated with the Health of School-Age Adolescents	Urchaga, J. D., Guevara, R. M., Cabaco, A. S., Moral-Garcia, J. E.	2020	Spain	EU	1226	Satisfaction with family relationships	Family life satisfaction	IV	Sports physical activity; personal life satisfaction; Quality of Life Associated with Health	Sports physical activity; personal life satisfaction; Quality of Life Associated with Health	Sectional
212	1	Soft drink consumption in adolescence: associations with food-related lifestyles and family rules in Belgium Flanders and the Veneto Region of Italy	Verzeletti, C., Maes, L., Santinello, M., Vereecken, C. A.	2010	Belgium	EU	14407	family meals; soft-drink-related parental rules	daily breakfast with parents; daily evening dinner with parents; soft-drink-related parental rules	IV	Soft drink consumption	Soft drink consumption	Sectional
213	1	Parents' support and knowledge of their daughters' lives, and females' early sexual initiation in nine European countries	Madkour, A. S., Farhat, T., Halpern, C. T., Gabhainn, S. N., Godeau, E.	2012	multiple(N=9)	EU	7466	Parental emotional support; Parental monitoring	Parental Bonding Instrument; Parental monitoring	IV	Early sexual initiation	Early sexual initiation	Sectional
214	1	Social support, sense of community in school, and self-efficacy as resources during early adolescence: an integrative model	Vieno, A., Santinello, M., Pastore, M., Perkins, D. D.	2007	Italy	EU	7097	parental emotional support	Parental Bonding Inventory	IV	Psychosocial well-being	Life satisfaction; psychosomatic complaints (HBSC Symptom Checklist)	Sectional
215	1	Life Satisfaction in Adolescents: The Role of Individual and Social Health Assets	Calmeiro, L., Camacho, I., de Matos, M. G.	2018	Portugual	EU	3494	Family support; Parental monitoring	Family support; Parental monitoring	IV	Life Satisfaction	Life Satisfaction	Sectional
218	1	Associations between life contexts and early sexual initiation among young women in France	Jovic, Sonia, Delpierre, Cyrille, Ehlinger, Virginie, Sentenac, Mariane, Young, Honor, Arnaud, Catherine, Godeau, Emmanuelle	2014	France	EU	1094	Family structure; communication with parents; parental bonding; parental monitoring	Household compositionl;communication with parents; bonding; parental monitoring	IV	Early sexual initiation	Early sexual initiation	Sectional
220	1	Trends over Time in Adolescent Emotional Wellbeing in the Netherlands, 2005-2017: Links with Perceived Schoolwork Pressure, Parent-Adolescent Communication and Bullying Victimization	De Looze, M. E., Cosma, A. P., Vollebergh, W. A. M., Duinhof, E. L., de Roos, S. A., van Dorsselaer, S., van Bon-Martens, M. J. H., Vonk, R., Stevens, G. W. J. M.	2020	Netherlands	EU	21901	Communication with parents	Communication with parents	IV	Emotional symptoms; Psychosomatic complaints; Life satisfaction	Strengths and Difficulties Questionnaire; HBSC Symptom Checklist; Life satisfaction	Sectional
221	1	Suicidal thoughts and depressive feelings amongst Estonian schoolchildren: effect of family relationship and family structure	Samm, A., Tooding, L. M., Sisask, M., Kolves, K., Aasvee, K., Varnik, A.	2010	Estonia	EU	4389	satisfaction with family relationships; communication with parents; family structures; SES	family satisfaction; communication with parents; household composition; family economic deprivation based on FAS	IV	suicidal ideation; depressive feelings	suicidal ideation; depressive feelings	Sectional
222	1	The Prevalence and Predictors of Suicidal Ideation Among Slovene Adolescents	Bračič, M., Roškar, S., Zager Kocjan, G., Jeriček Klanšček, H.	2019	Slovenia	EU	1547	Family support	family support	IV	suicidal ideation	suicidal ideation	Sectional
224	1	Weight concerns among adolescent boys	Kelly, C., Fitzgerald, A., Sentenac, M., Gakewski, J., Molcho, M., Nic Gabhainn, S.	2016	Ireland	EU	6187	Family meals; Communication with parents; SES; Family structure	Breakfast with family; Communication with parents; Maternal employment; Family structure	IV	Weight concerns	Weight concerns	Sectional
225	1	Lunch frequency among adolescents: Associations with sociodemographic factors and school characteristics	Pedersen, T. P., Holstein, B. E., Krolner, R., Ersbøll, A. K., Jørgensen, T. S., Aarestrup, A. K., Utter, J., McNaughton, S. A., Neumark-Stzainer, D., Rasmussen, M.	2016	Denmark	EU	4429	SES; immigrant status; family structure	family occupational social class; immigrant status; household composition	IV	lunch frequency		Sectional
226	1	Social and behavioral predictors of adolescents’ positive attitude towards life and self	Malinowska-Cieślik, M., Mazur, J., Nałęcz, H., Małkowska-Szkutnik, A.	2019	Poland	EU	2939	SES; family communication	FAS; Family Dynamics Measure II	IV	Positive Attitude	Positive Attitude Scale	Sectional
228	1	High and low levels of positive mental health: are there socioeconomic differences among adolescents?	Nielsen, L., Stewart-Brown, S., Vinther-Larsen, M., Meilstrup, C., Holstein, B. E., Koushede, V.	2016	Denmark	EU	3670	SES	Parents’ occupational social class	IV	Positive mental health	self-esteem; social competence	Sectional
229	1	International trends in 'bottom-end' inequality in adolescent physical activity and nutrition: HBSC study 2002-2014	Chzhen, Y., Moor, I., Pickett, W., Toczydlowska, E., Stevens, G. W. J. M.	2018	multiple(N=34)	Global	185355	SES	FAS	IV	physical activity; healthy diet; unhealthy diet; ‘bottom-end’ health	MVPA; healthy eating indexl; mean in the lower half of the distribution of MVPA/diet	Trend
230	1	Psychosocial correlates of adolescent marijuana use: Variations by status of marijuana use	Farhat, T., Simons-Morton, B., Luk, J. W.	2011	US	NA	1465	Parental monitoring	Parental monitoring	IV	marijuana use	Former experimental use; Current occasional use; Current frequent use	Sectional
231	1	Social reproduction of physical activity: Implications for health promotion in young people	Wold, B., øygard, L., Eder, A., Smith, C.	1994	multiple(N=3)	EU	1233	Parental physical activity	Parental participant in physical activity	IV	physical activity	regular physical activity	Sectional
234	1	Multiple risk behaviors and suicidal ideation and behavior among Israeli and Palestinian adolescents	Harel-Fisch, Y., Abdeen, Z., Walsh, S. D., Radwan, Q., Fogel-Grinvald, H.	2012	Israel	ME	8345	communication with parents	communication with parents	IV	Suicidal ideation and behavior	Suicidal ideation and behavior	Sectional
235	1	Socio-Economic Inequalities in Adolescent Summer Holiday Experiences, and Mental Wellbeing on Return to School: Analysis of the School Health Research Network/Health Behaviour in School-Aged Children Survey in Wales	Morgan, K., Melendez-Torres, G. J., Bond, A., Hawkins, J., Hewitt, G., Murphy, S., Moore, G.	2019	Wales	EU	101910	SES	FAS	IV	Mental wellbeing	Short Warwick-Edinburgh Mental Wellbeing Scale ; Internalising Symptoms	Sectional
237	1	Socialization instances linked to cannabis experimentation among French teenagers	Jovic, S., Genolini, C., Delpierre, C., Spilka, S., Ehlinger, V., Ross, J., Arnaud, C., Godeau, E.	2014	France	EU	4175	SES; Family structure;Communication with parents; Parental monitoring	Parents’ occupational social class; FAS; Household composition; Communication with parents; Parental monitoring	IV	Cannabis Experimentation	cannabis consumption	Sectional
241		The Happiest Kids on Earth. Gender Equality and Adolescent Life Satisfaction in Europe and North America	de Looze, M. E., Huijts, T., Stevens, G. W. J. M., Torsheim, T., Vollebergh, W. A. M.	2018	multiple(N=34)	EU+NA	171528	SES; Family structure; Communication with parents	Rank of FAS; Family structure; Communication with parents	IV	Life satisfaction	Life satisfaction	Sectional
242		Ethnic differences in youth well-being: The role of sociodemographic background and social support	Runarsdottir, E. M., Vilhjalmsson, R.	2015	Iceland	EU	11435	SES; Family structure; Communication with parents	FAS; Parental employment; Household compostion; Communication with parents	IV	Life satisfaction; Subjective psychosomatic complaints	Life satisfaction; HBSC symptom Checklist	Sectional
245		Food-related family lifestyle associated with fruit and vegetable consumption among young adolescents in Belgium Flanders and the Veneto Region of Italy	Verzeletti, C., Maes, L., Santinello, M., Baldassari, D., Vereecken, C. A.	2010	multiple(N=2)	EU	14407	SES;family meals; eating-related parental rules	FAS; Dinner with family; Family rules of eating	IV	Fruit/vegetable consumption	Fruit/vegetable consumption	Sectional
247		Eating Breakfast and Family Meals in Adolescence: The Role of Body Image	Ramseyer Winter, V., Jones, A., O’Neill, E.	2019	US	NA	12642	family meals	meals with parents	IV	Body image	Self body image	Sectional
248		Sustaining a positive body image in adolescence: an assets-based analysis	Fenton, C., Brooks, F., Spencer, N. H., Morgan, A.	2010	England	EU	6425	SES; Family structure; Communication with parents	FAS; Household composition; Communication with parents	IV	Body image	Body image	Sectional
249		Worries, coping strategies and well-being in adolescence: highlights from HBSC study in Portugal	Matos, M. G. D., Camacho, I., Reis, M., Costa, D., Galvão, D.	2016	Portugual	EU	3869	Family support	Family support	IV	feeling better when facing worries	feeling better when facing worries	Sectional
251		Medically Attended Injuries among Slovak Adolescents: Relationships with Socio-Economic Factors, Physical Fighting, and Physical Activity	Bakalar, P., Rosicova, K.	2020	Slovakia	EU	7928	SES	FAS	IV	Medically Attended Injuries	Medically Attended Injuries	Sectional
255		Empowerment-enabling home and school environments and self-rated health among Finnish adolescents	Simonsen, N., Lahti, A., Suominen, S., Välimaa, R., Tynjälä, J., Roos, E., Kannas, L.	2020	Finland	EU	7802	Home atmosphere; Family support	Home atmosphere; Family support	IV	Self-rated health	Self-rated health	Sectional
256		Testing the theory of holism: A study of family systems and adolescent health	Michaelson, V., Pickett, W., King, N., Davison, C.	2016	Canada	NA	19333	Family meals; Family support; SES	Frequency of family meals; Family support; Subjective family wealth	IV	Physical activity; risk behaviour; life satisfaction; psychosomatic symptoms	Physical activity; risk behaviour (substance use, fighting, bullying and energy drink consumption); life satisfaction; HBSC Symptom Checklist	Sectional
258		The sources of support and their relation on the global health of adopted and non-adopted adolescents	Paniagua, C., Moreno, C., Rivera, F., Ramos, P.	2019	Spain	EU	28768	Family support	Family support	IV	Global Health Score	Life satisfaction; Self-reported health; Health-related quality of life (Kidscreen-10); Psychosomatic complaints (HBSC Symptom Checklist)	Sectional
261		Greenlandic schoolchildren's compliance with national dietary guidelines	Niclasen, B., Schnohr, C. W.	2010	Greenland	EU	2462	SES	FAS	IV	Diet habbit	National Diet Guidelines	Sectional
262		How Are Adolescents Sleeping? Adolescent Sleep Patterns and Sociodemographic Differences in 24 European and North American Countries	Gariepy, G., Danna, S., Gobiņa, I., Rasmussen, M., Gaspar de Matos, M., Tynjälä, J., Janssen, I., Kalman, M., Villeruša, A., Husarova, D., Brooks, F., Elgar, F. J., Klavina-Makrecka, S., Šmigelskas, K., Gaspar, T., Schnohr, C.	2020	multiple(N=24)	EU+NA	165793	SES	FAS	IV	Sleep patterns	Sleep patterns	Sectional
267		Subjective health literacy among school-aged children	Paakkari, O., Torppa, M., Villberg, J., Kannas, L., Paakkari, L.	2018	Finland	EU	3732	SES	FAS	IV	Health Literacy	Health Literacy Scale	Sectional
268		Social support from developmental contexts and adolescent substance use and well-being: A comparative study of Spain and Portugal	Jiménez-Iglesias, A., Camacho, I., Rivera, F., Moreno, C., De Matos, M. G.	2017	multiple(N=2)	EU	28394	Family support	Family support	IV	Substance Use; wellbeing	Life satisfaction; Health-related quality of life(KIDSCREEN-10)	Sectional
269		Demographic and social inequalities in need for orthodontic treatment among schoolchildren in Lithuania	Kavaliauskiene, A., Sidlauskas, A., Zaborskis, A.	2010	Lithuania	EU	5632	SES	FAS	IV	Orthodontic complaints; Use of orthodontic appliances	Orthodontic complaints; Use of orthodontic appliances	Sectional
272		Substance Use Across Adolescence: Do Gender and Age Matter?	Simoes, C., Matos, M. G., Batista-Foguet, J. M., Simons-Morton, B.	2014	Portugual	EU	12881	Communication with parents	Communication with parents	IV	Substance Use	Tobacco/alcohol/drug use	Sectional
273		Body weight dissatisfaction and communication with parents among adolescents in 24 countries: international cross-sectional survey	Al Sabbah, H., Vereecken, C. A., Elgar, F. J., Nansel, T., Aasvee, K., Abdeen, Z., Ojala, K., Ahluwalia, N., Maes, L.	2009	multiple(N=24)	EU+NA	160000	Communication with parents	Communication with parents	IV	Body Weight Dissatisfaction	Body Weight Dissatisfaction	Sectional
274		National Income and Income Inequality, Family Affluence and Life Satisfaction Among 13 year Old Boys and Girls: A Multilevel Study in 35 Countries	Levin, K. A., Torsheim, T., Vollebergh, W., Richter, M., Davies, C. A., Schnohr, C. W., Due, P., Currie, C.	2011	multiple(N=35)	Global	58364	family structure; SES	Household composition; Ridit transformations of FAS	IV	Life satisfaction	Life satisfaction	Sectional
278		Income Inequality and Adolescent Gambling Severity: Findings from a Large-Scale Italian Representative Survey	Canale, N., Vieno, A., Lenzi, M., Griffiths, M. D., Borraccino, A., Lazzeri, G., Lemma, P., Scacchi, L., Santinello, M.	2017	Italy	EU	20791	Family structure; SES; Family support	Family structure; FAS; Family support	IV	At-risk or problem gambling	South Oaks Gambling Screen-Revised for Adolescents	Sectional
279		Early adolescent sexual initiation as a problem behavior: A comparative study of five nations	Madkour, A. S., Farhat, T., Halpern, C. T., Godeau, E., Gabhainn, S. N.	2010	multiple(N=5)	EU+NA	5624	family structure; SES	Household compostion; parental education; FAS	IV	sexual initiation	sexual initiation	Sectional
282		Regular energy drink consumption is associated with the risk of health and behavioural problems in adolescents	Holubcikova, J., Kolarcik, P., Madarasova Geckova, A., Reijneveld, S. A., van Dijk, J. P.	2017	Slovakia	EU	8977	SES	FAS	IV	energy drink consumption	energy drink consumption	Sectional
283		Exploring Sex Differences in the Association between Bullying Involvement and Alcohol and Marijuana Use among US Adolescents in 6(th) to 10(th) Grade	Lee, J., Choi, M. J., Thornberg, R., Hong, J. S.	2020	US	NA	7084	Parental monitoring; parental emotional support; SES; Satisfaction with family relationships	Parental monitoring; parental emotional support; subjective family wealth; Family satisfaction	IV	alcohol use; marijuana use	alcohol use; marijuana use	Sectional
285		Multiple risk behavior and injury: An international analysis of young people	Pickett, W., Schmid, H., Boyce, W. F., Simpson, K., Scheidt, P. C., Mazur, J., Molcho, M., King, M. A., Godeau, E., Overpeck, M., Aszmann, A., Szabo, M., Harel, Y.	2002	multiple(N=12)	Global	49461	Communication with parents	Communication with parents	IV	Injury	Injury	Sectional
286		School-Related Social Support and Students' Perceived Life Satisfaction	Danielsen, A. G., Samdal, O., Hetland, J., Wold, B.	2009	Norway	EU	3358	School-related parental support	School-related parental support	IV	Life satisfaction	Students’ Life Satisfaction Scale	Sectional
287		Joint Physical Custody and Adolescents' Life Satisfaction in 37 North American and European CountriesPalabras clave(sic)(sic)(sic)	Steinbach, A., Augustijn, L., Corkadi, G.	2021	multiple(N=37)	EU+NA	92886	physical custody arrangement	physical custody arrangement	IV	Life satisfaction	Life satisfaction	Sectional
288		Poor Health and Experiences of Being Bullied in Adolescents: Self-Perceived Overweight and Frustration with Appearance Matter	Lin, Y. C., Latner, J. D., Fung, X. C. C., Lin, C. Y.	2018	US	NA	8303	Parental emotional support	Parental emotional support	IV	self-rated health; Life satisfaction; Psychosomatic symptoms;	self-rated health; Life satisfaction; HBSC symptom Checklist	Sectional
77	1	Connectedness as a protective factor in immigrant youth: results from the Health Behaviours in School-aged Children (HBSC) Italian study	Borraccino, A., Berchialla, P., Dalmasso, P., Sciannameo, V., Vieno, A., Lazzeri, G., Charrier, L., Lemma, P.	2020	Italy	EU	47399	SES; Family support	FAS; Family support	IV	Life satisfaction; Health complaints;	Life satisfaction; HBSC Symptom Checklist	Sectional
107	1	Does Life Satisfaction Mediate the Association between Socioeconomic Status and Excessive Internet Use?	Urbanova, L. B., Holubcikova, J., Geckova, A. M., Reijneveld, S. A., van Dijk, J. P.	2019	Slovakia	EU	2844	SES	subjective family wealth; parental highest education; parental (un)employment	IV	Excessive Internet Use	Excessive Internet Use scale	Sectional
133	1	Physical activity and features of the environment in which school children grow up as low mood determinants	Kleszczewska, D., Siedlecka, J., Mazur, J.	2019	Poland	EU	5195	SES; Family structure;Family support	FAS; Household composition; Family support	IV	general wellbeing;	WHO-5 wellbeing screen test	Sectional
151	1	Problematic Social Media Use and Health among Adolescents	Paakkari, L., Tynjala, J., Lahti, H., Ojala, K., Lyyra, N.	2021	Finland	EU	3408	SES	FAS	IV	Problematic social media use	Social Media Disorder Scale	Sectional
184	1	Adolescent toothbrushing and the home environment: sociodemographic factors, family relationships and mealtime routines and disorganisation	Levin, K. A., Currie, C.	2010	Scotland	EU	6190	Family structure; SES; Satisfaction with family relationships; Family meals	Household composition; number of siblings; have (not) the second home; FAS; Parental employment; Contact with parents; Perceived parenting; Comunication with parents/siblings; Family evening meal	IV	Tooth brushing	Tooth brushing	Sectional
200	1	Shared physical custody after family split-up: implications for health and well-being in Swedish schoolchildren	Carlsund, A., Eriksson, U., Sellstrom, E.	2013	Sweden	EU	10286	Family structure; communication with parents	Household composition; communication with parents	IV	subjective health complaints; subjective wellbeing	HBSC Symptom Checklist; Wellbeing scale	Sectional
201	1	Risk behaviour in Swedish adolescents: is shared physical custody after divorce a risk or a protective factor?	Carlsund, A., Eriksson, U., Lofstedt, P., Sellstrom, E.	2013	Sweden	EU	3699	SES; Immigrant status; Communication with parents; Family structure	Parental employment; subjective family wealth; Immigrant status; Communication with parents; Household composition	IV	Smoking; Drinking; Sexual debut; Conduct problems	Smoking; Drinking; Sexual debut; Strengths and Difficulties Questionnaire	Sectional
211	1	Prevalence of emergency contraceptive pill use among Spanish adolescent girls and their family and psychological profiles	Jimenez-Iglesias, A., Moreno, C., Garcia-Moya, I., Rivera, F.	2018	Spain	EU	1735	Parental monitoring; Communication with parents	Parental monitoring; Communication with parents	IV	emergency contraceptive pill	emergency contraceptive pill	Sectional
280		The influence of individual and regional factors on association between leisure time physical activity and psychological complaints among adolescents in europe	Petronyte, G., Zaborskis, A.	2009	multiple(N=20)	EU	106319	SES	FAS	IV	subjective psychological complaints	HBSC Symptom Checklist	Sectional
113	1	Socio-demographic variability in adolescent substance use: Mediation by parents and peers	Wang, J., Simons-Morton, B. G., Farhart, T., Luk, J. W.	2009	US	NA	8795	Family structure; SES; parental monitoring	household compositionl; FAS; parental monitoring	IV and mediator	Substance Use	Sdrinking alcohol; being drunk; smoking cigarettes	Sectional	Family structure; family affluence-IV; parental monitoring- mediator
186	1	Family composition and age at menarche: Findings from the international Health Behaviour in School-aged Children study	Steppan, M., Whitehead, R., McEachran, J., Currie, C.	2019	multiple(N=41)	Global	213595	Family member; family wealth	household compostion; FAS; siblings	IV and mediator	Age of menarche	Age of menarche	Sectional	FAS-IV; Family member-mediator
110	1	Family Structure and Adolescent Substance Use: An International Perspective	Hoffmann, J. P.	2017	multiple(N=37)	Global	193202	SES; family structure; communication with parents	FAS; Household composition; communication with parents	IV and mediator	substance use	cigarette/alcohol/cannabis use	Sectional
198	1	The Association Between Adolescent Life Satisfaction, Family Structure, Family Affluence and Gender Differences in Parent-Child Communication	Levin, K. A., Dallago, L., Currie, C.	2012	Scotland	EU	5126	Family structure; SES; communication with parents		IV and moderator	Life Satisfaction	Life Satisfaction	Sectional	interaction term between family structure and parent–child communication
239	1	Bullying, family resources, and mental health: A test of the ABC-X theory	Resnick, Elise M.	2014	US	NA	9198	Communication with parents; Seeing parents; Satisfaction with Family Relationships	Communication with parents; Seeing parents; Satisfaction with Family Relationships	IV and moderator	Mental health; Life satisfaction	Mental health; Life satisfaction	Sectional	all family factors are mod
146	1	The influence of parental occupation and the pupils' educational level on lifestyle behaviors among adolescents in Belgium	Vereecken, C. A., Maes, L., De Bacquer, D.	2004	Belgium Flanders	EU	7613	SES	Parental occupational status; children's educational level	IV and moderator	Health lifestyle	food habits; substance use; physical inactivity; dental care	Sectional	But no interaction between SES, gender and age
10	1	Does family communication moderate the association between adverse childhood experiences and emotional and behavioural problems?	Lackova Rebicova, M., Dankulincova Veselska, Z., Husarova, D., Klein, D., Madarasova Geckova, A., Van Dijk, J. P., Reijneveld, S. A.	2020	Slovakia	EU	5202	Communication with parents	Communication with mother; Communication with father	IV and moderator	Internalizing and externalizing problems	Strengths and Difficulties Questionnaire	Sectional	communication mod
174	1	Protective roles of home and school environments for the health of young Canadians	Freeman, J., King, M., Kuntsche, E., Pickett, W.	2011	Canada	NA	5368	Family environment	Parental understanding; Parental trust; communication with parents; happiness of home life	IV and moderator	psychosomatic symptoms; serious injuries	HBSC Symptom Checklist; serious injuries	Trend	Family environment is a composite concept; Interaction between family environment and school environment
236	1	Do social support and eating family meals together play a role in promoting resilience to bullying and cyberbullying in Scottish school children?	Shaw, R. J., Currie, D. B., Smith, G. S., Brown, J., Smith, D. J., Inchley, J. C.	2019	Scotland	EU	2581	Family meals	Family meals	IV and moderator	subjective wellbeing		Sectional	family meal: moderator for cyberbullying experience, but not sig
135	1	Portuguese Adolescents: the Importance of Parents and Peer Groups in Positive Health	Tome, G., de Matos, M. G., Camacho, I., Simoes, C., Diniz, J. A.	2012	Portugual	EU	3636	Communication with Parents	Communication with Parents	IV and moderator	subjective health complaints	HBSC Symptom Checklist	Sectional	Family moderated peer communication effects
175	1	School composition, school culture and socioeconomic inequalities in young people's health: Multi-level analysis of the Health Behaviour in School-aged Children (HBSC) survey in Wales	Moore, G. F., Littlecott, H. J., Evans, R., Murphy, S., Hewitt, G., Fletcher, A.	2017	Wales	EU	9055	SES	FAS	IV and moderator	Health behaviours	physical activity; fruit and vegetable consumption; tobacco/ alcohol/cannabis use	Sectional	Family SES moderated school-level SES
168	1	Irregular breakfast consumption in adolescence and the family environment: Underlying causes by family structure	Levin, K. A., Kirby, J.	2012	Scotland	EU	16406	Family structure; SES; Seeing parents; Perceived parenting; Communication with parents; Communication with siblings	Household composition; FAS; Contact with parents; Perceived parenting; Communication with parents; Communication with siblings	IV and moderator	Irregular breakfast consumption	Daily breakfast consumption	Sectional	Family structure was a moderator
275		Communication in single- and two-parent families and their influence on Portuguese and Spanish adolescents’ life satisfaction	Camacho, I., Jiménez-Iglesias, A., Rivera, F., Moreno, C., Gaspar de Matos, M.	2020	multiple(N=2)	EU	24070	Family structure; communication with parents	Household composition; communication with parents	IV and moderator	Life satisfaction	Life satisfaction	Sectional	Family structure was a moderator, communication was a IV
117	1	School, Peer and Family Relationships and Adolescent Substance Use, Subjective Wellbeing and Mental Health Symptoms in Wales: a Cross Sectional Study	Moore, G. F., Cox, R., Evans, R. E., Hallingberg, B., Hawkins, J., Littlecott, H. J., Long, S. J., Murphy, S.	2018	Wales	EU	8009	family support; family communication	family support; family communication	IV and moderator	substance use; subjective wellbeing; mental health symptoms	tobacco use; cannabis use; alcohol use; subjective wellbeing; HBSC-Symptom checklist	Sectional	Family support-mod
197	1	The interplay between national and parental unemployment in relation to adolescent life satisfaction in 27 countries: Analyses of repeated cross-sectional school surveys	Johansson, K., Petersen, S., Högberg, B., Stevens, G. W. J. M., De Clercq, B., Frasquilho, D., Elgar, F., Strandh, M.	2019	multiple(N=27)	Global	386402	SES; Family structure	Parental unemployment; Family structure	IV and moderator	Life satisfaction	Life satisfaction	Sectional	family-level factor moderated country-level factor
271		Association of alcohol control policies with adolescent alcohol consumption and with social inequality in adolescent alcohol consumption: A multilevel study in 33 countries and regions	Leal-López, E., Moreno-Maldonado, C., Inchley, J., Deforche, B., Van Havere, T., Van Damme, J., Buijs, T., Sánchez-Queija, I., Currie, D., Vieno, A., De Clercq, B.	2020	multiple(N=33)	EU+NA	671084	SES	FAS; Subjective family wealth	IV and moderator	alcohol consumption	alcohol consumption	Sectional	FAS was IV, as well as moderator
244		Supportive communication with parents moderates the negative effects of electronic media use on life satisfaction during adolescence	Boniel-Nissim, M., Tabak, I., Mazur, J., Borraccino, A., Brooks, F., Gommans, R., van der Sluijs, W., Zsiros, E., Craig, W., Harel-Fisch, Y., Finne, E.	2015	multiple(N=9)	EU+NA	53973	SES; Family structure; Communication with parents	FAS; Family structure; Communication with parents;	IV and moderator	Life satisfaction	Life satisfaction	Sectional	FAS, Family structure--IV; Communication with parents-- moderator
143	1	Psychosocial working conditions: An analysis of emotional symptoms and conduct problems amongst adolescent students	Plenty, S., Ostberg, V., Almquist, Y. B., Augustine, L., Modin, B.	2014	Sweden	EU	3685	School-related parental support	School-related parental support	IV and moderator	Emotional symptoms and conduct problems	The Strengths and Difficulties Questionnaire	Sectional	However, parental support did not moderate the effect of school demand significantly
257		Socioeconomic disparities in diet vary according to migration status among adolescents in Belgium	Rouche, M., De Clercq, B., Lebacq, T., Dierckens, M., Moreau, N., Desbouys, L., Godin, I., Castetbon, K.	2019	Belgium	EU	19172	Immigrant status; SES; Family structure	Immigrant status; Family affluence; Parental employment; Household composition; Siblings	IV and moderator	Food Frequency	Food Frequency Scale	Sectional	Immigrant status -- moderator
123	1	Parents, teachers and peer relations as predictors of risk behaviors and mental well-being among immigrant and Israeli born adolescents	Walsh, S. D., Harel-Fisch, Y., Fogel-Grinvald, H.	2010	Ireland	EU	7866	Immigrant status; Communication with parents; Family activity; Parental monitoring; School-related parental support	Immigrant status; Communication with parents; Family activity; Parental monitoring; School-related parental support	IV and moderator	Health risk behaviours; Wellbeing	Smoking; Drinking; HBSC Symptoms Checklist	Sectional	Immigrant status -- moderator; Relationship with parents --IV
148	1	Mental Health in Adolescents with a Migration Background in 29 European Countries: The Buffering Role of Social Capital	Delaruelle, K., Walsh, S. D., Dierckens, M., Deforche, B., Kern, M. R., Currie, C., Maldonado, C. M., Cosma, A., Stevens, G. W. J. M.	2021	multiple(N=29)	EU	121751	Immigrant status; Family support	Immigrant status; Family support	IV and moderator	Mental health	Life dissatisfaction; HBSC Symptoms Checklist	Sectional	Interaction between immigrant status and family support
65	1	Socioeconomic inequalities in health among Swedish adolescents - adding the subjective perspective	Ahlborg, M., Svedberg, P., Nyholm, M., Morgan, A., Nygren, J. M.	2017	Sweden	EU	23008	SES	subjective family wealth; FAS	IV and moderator	self-rated health	subjective health complaints; lifesatisfaction; health perception	Trend	Interaction between SES and gender
276		The role of community social capital in the relationship between socioeconomic status and adolescent life satisfaction: mediating or moderating? Evidence from Czech data	Buijs, T., Maes, L., Salonna, F., Van Damme, J., Hublet, A., Kebza, V., Costongs, C., Currie, C., De Clercq, B.	2016	Czech	EU	4425	SES	FAS; subjective family wealth	IV and moderator	Life satisfaction	Life satisfaction	Sectional	Interaction between SES and social capital
91	1	Adolescent Socioeconomic Status and Mental Health Inequalities in the Netherlands, 2001-2017	Weinberg, D., Stevens, Gwjm, Duinhof, E. L., Finkenauer, C.	2019	Netherlands	EU	27020	SES	FAS; subjective family wealth; personal education level	IV and moderator	Mental Health Problems	Strengths and Difficulties Questionnaire; life satisfaction	Trend	Interaction between subjective SES and parental SES; interaction between subjective/parental SES and years
260		Exploring Whether Talking With Parents, Siblings, and Friends Moderates the Association Between Peer Victimization and Adverse Psychosocial Outcomes	Hong, J. S., Zhang, S., Gonzalez-Prendes, A. A., Albdour, M.	2020	US	NA	12642	Family structure; SES; communication with parents; communication with siblings	Family structure; subjective family wealth; communication with parents; communication with siblings	IV and moderator	alcohol/tobacco use; delinquent friend affiliation; internalizing problems	alcohol/tobacco use; delinquent friend affiliation; HBSC Symptom Checklist	Sectional	Interaction ParentCommunication*peer
108	1	The Role of the Family in Promoting Responsible Substance Use in Adolescence	Jimenez-Iglesias, A., Moreno, C., Rivera, F., Garcia-Moya, I.	2013	Spain	EU	14825	Parental emotional support; Parental Promotion of Autonomy; Family Activity; Parental monitoring; Sources of parental knowledge	Parental Bonding Inventory-Brief Current Form; Family Activities; Parental monitoring; Perceived Sources of Parental Knowledge	IV and moderator	Substance Use	cigarette/alcohol/cannabis use	Sectional	moderator: parental emotional support, autonomy promotion, parental monitoring, family activity
109	1	What family dimensions are important for health-related quality of life in adolescence?	Jimenez-Iglesias, A., Moreno, C., Ramos, P., Rivera, F.	2015	Spain	EU	14825	Parental emotional support; Parental Promotion of Autonomy; Family Activity; Parental monitoring; Sources of Parental Knowledge	Parental Bonding Inventory-Brief Current Form; Family Activities; Parental monitoring; Perceived Sources of Parental Knowledge	IV and moderator	Health-related quality of life	KIDSCREEN-10 index questionnaire	Sectional	moderator: parental emotional support, autonomy promotion, parental monitoring, family activity
138	1	Factors affecting the well-being of adolescents living with unemployed parents in times of economic recession: findings from the Portuguese HBSC study	Frasquilho, D., de Matos, M. G., Marques, A., Gaspar, T., Caldas-de-Almeida, J. M.	2017	Portugual	EU	1311	SES; Satisfaction with the family relationships	Parental employment; FAS; Satisfaction with the family life	IV and moderator	Emotional well-being	single-item self-rated health scale	Sectional	Parental employment-- IV; SES --IV; Satisfaction with the family life-- moderator
150	1	Social Capital as a Moderator of the Relationship Between Perceived Discrimination and Alcohol and Cannabis Use Among Immigrant and Non-immigrant Adolescents in Israel	Walsh, S. D., Kolobov, T., Harel-Fisch, Y.	2018	Israel	ME	8598	Parental monitoring; SES; Immigrant status	Parental monitoring; FAS; Immigrant status	IV and moderator	Substance Use	Alcohol/cannabis use	Sectional	Parental monitoring- IV and mod; SES, Immigrant status--IV
141	1	Psychosocial work environment in school and students' somatic health complaints: An analysis of buffering resources	Sonmark, K., Modin, B.	2017	Sweden	EU	9427	School-related parental support	School-related parental support	IV and moderator	Somatic health	HBSC symptom checklist	Sectional	Parental support was IV, also moderated the relationship between DV and school demand
85	1	Close relations to parents and emotional symptoms among adolescents: beyond socio-economic impact?	Damsgaard, M. T., Holstein, B. E., Koushede, V., Madsen, K. R., Meilstrup, C., Nelausen, M. K., Nielsen, L., Rayce, S. B.	2014	Denmark	EU	15646	Communication with parents; SES	Communication with parents; parents' occupational class	IV and moderator	Emotional symptoms	HBSC Symptom Check List	Sectional	Relationship - IV; SES - moderator
61	1	Family structure and breakfast consumption of 11-15 year old boys and girls in Scotland, 1994-2010: a repeated cross-sectional study	Levin, K. A., Kirby, J., Currie, C.	2012	Scotland	EU	26626	Family structure	Household composition	IV and moderator	Breakfast consumption	Daily breakfast consumption	Trend	SES inequality trend: Family structure was a moderator in the relationship of year and health outcome
7	1	Social inequality in adolescent daily smoking: Has it changed over time?	Rasmussen, M., Due, P., Damsgaard, M. T., Holstein, B. E.	2009	Denmark	EU	6703	SES	Parents’ occupational social class	IV and moderator	Smoking behaviour	Daily smoking	Trend	SES inequality trend: SES was a moderator in the relationship of year and health outcome
11	1	Trends in socioeconomic differences in daily smoking among 15-year-old Danes 1991-2014	Holstein, B. E., Andersen, A., Damsgaard, M. T., Due, P., Bast, L. S., Rasmussen, M.	2020	Denmark	EU	8641	SES	Parents’ occupational social class	IV and moderator	Smoking	Daily smoking	Trend	SES inequality trend: SES was a moderator in the relationship of year and health outcome
13	1	Brief report: Trends in social inequality in drunkenness among Danish adolescents, 1991–2014	Bendtsen, Pernille, Andersen, Anette, Damsgaard, Mogens Trab, Due, Pernille, Rasmussen, Mette, Holstein, Bjørn E.	2018	Denmark	EU	8655	SES	Parents’ occupational social class	IV and moderator	Frequency of drunkenness	Frequency of drunkenness	Trend	SES inequality trend: SES was a moderator in the relationship of year and health outcome
15	1	Increasing prevalence of emotional symptoms in higher socioeconomic strata: Trend study among Danish schoolchildren 1991–2014	Due, P., Damsgaard, M. T., Madsen, K. R., Nielsen, L., Rayce, S. B., Holstein, B. E.	2019	Denmark	EU	31169	SES	Parents’ occupational social class	IV and moderator	Emotional symptoms	HBSC Symptom Check List	Trend	SES inequality trend: SES was a moderator in the relationship of year and health outcome
16	1	Trends in social inequality in physical inactivity among Danish adolescents 1991–2014	Johnsen, N. F., Toftager, M., Melkevik, O., Holstein, B. E., Rasmussen, M.	2017	Denmark	EU	30974	SES	Parents’ occupational social class	IV and moderator	Physical inactivity	Vigorous physical activity	Trend	SES inequality trend: SES was a moderator in the relationship of year and health outcome
17	1	Persistent social inequality in medicine use for headache among adolescents in Denmark 1991–2014	Holstein, B. E., Denbæk, A. M., Andersen, A., Due, P.	2019	Denmark	EU	26685	SES	Parents’ occupational social class	IV and moderator	Headache	Medication for headache	Trend	SES inequality trend: SES was a moderator in the relationship of year and health outcome
18	1	Trends in social inequality in overweight and obesity among adolescents in Denmark 1998-2018	Rasmussen, M., Damsgaard, M. T., Morgen, C. S., Kierkegaard, L., Toftager, M., Rosenwein, S. V., Krolner, R. F., Due, P., Holstein, B. E.	2020	Denmark	EU	22177	SES	Parents’ occupational social class	IV and moderator	Overweight and obesity	BMI	Trend	SES inequality trend: SES was a moderator in the relationship of year and health outcome
21	1	Persistent social inequality in low intake of vegetables among adolescents, 2002-2014	Rasmussen, M., Pedersen, T. P., Johnsen, N. F., Krolner, R. F., Holstein, B. E.	2018	Denmark	EU	17243	SES	Parents’ occupational social class	IV and moderator	Vegetable intake	Vegetable intake frequency	Trend	SES inequality trend: SES was a moderator in the relationship of year and health outcome
23	1	Intake of sugar sweetened soft drinks among adolescents: Trends and social inequality in Denmark 2002-2018	Holstein, B. E., Damsgaard, M. T., Due, P., Krølner, R. F., Pedersen, T. P., Rasmussen, M.	2020	Denmark	EU	20112	SES	Occupational Social Class; FAS	IV and moderator	Sugar sweetened soft drinks intake	HBSC food frequency questionnaire	Trend	SES inequality trend: SES was a moderator in the relationship of year and health outcome
24	1	Recurrent abdominal pain among adolescents: Trends and social inequality 1991-2018	Holstein, B. E., Damsgaard, M. T., Ammitzbøll, J., Madsen, K. R., Pedersen, T. P., Rasmussen, M.	2021	Denmark	EU	30048	SES	Parents’ occupational social class	IV and moderator	Recurrent abdominal pain	HBSC stomach-ache symptom check	Trend	SES inequality trend: SES was a moderator in the relationship of year and health outcome
40	1	Trends in socio-economic differences in tobacco smoking among German schoolchildren, 1994-2002	Richter, M., Leppin, A.	2007	Germany	EU	11401	SES	FAS	IV and moderator	Tobacco smoking	Weekly smoking	Trend	SES inequality trend: SES was a moderator in the relationship of year and health outcome
46	1	Social Determinants of Smoking, Alcohol and Drug Use Among Lithuanian School-Aged Children: Results From 5 Consecutive HBSC Surveys, 1994-2010	Sumskas, L., Zaborskis, A., Grabauskas, V.	2012	Lithuania	EU	26556	SES; Family structure	Subjective family wealth; Household composition	IV and moderator	Substance use	Tobacco/Alcohol/Cannabis use	Trend	SES inequality trend: SES was a moderator in the relationship of year and health outcome
49	1	Socioeconomic differences in the use of alcohol and drunkenness in adolescents: Trends in the Health Behaviour in School-aged Children study in Finland 1990–2014	Liu, Y., Lintonen, T., Tynjälä, J., Villberg, J., Välimaa, R., Ojala, K., Kannas, L.	2018	Finland	EU	11126	SES	Educational aspiration; Subjective family wealth	IV and moderator	Alcohol use; Drunkenness	Alcohol use frequency; Drunkenness	Trend	SES inequality trend: SES was a moderator in the relationship of year and health outcome
50	1	Trends in socioeconomic inequalities in adolescent alcohol use in Germany between 1994 and 2006	Richter, M., Kuntsche, E., De Looze, M., Pförtner, T. K.	2013	Germany	EU	5074	SES	FAS; Educational track	IV and moderator	Weekly alcohol use	Weekly alcohol use	Trend	SES inequality trend: SES was a moderator in the relationship of year and health outcome
55	1	Family Affluence and the Eating Habits of 11-to 15-Year-Old Czech Adolescents: HBSC 2002 and 2014	Voracova, J., Sigmund, E., Sigmundova, D., Kalman, M.	2016	Czech	EU	10831	SES	FAS	IV and moderator	Eating Habits	fruit/vegetables/sweetened soft drinks/sweets consumption	Trend	SES inequality trend: SES was a moderator in the relationship of year and health outcome
57	1	Vigorous physical activity in relation to family affluence: time trends in Europe and North America	Sigmundová, D., Sigmund, E., Tesler, R., Ng, K. W., Hamrik, Z., Mathisen, F. K. S., Inchley, J., Bucksch, J.	2019	multiple(N=34)	EU+NA	501647	SES	FAS	IV and moderator	Vigorous physical activity	Vigorous physical activity	Trend	SES inequality trend: SES was a moderator in the relationship of year and health outcome
90	1	Changing trends in young people’s food behaviour and wellbeing in England in relation to family affluence between 2005 and 2014	Simon, A., Owen, C., O’Connell, R., Brooks, F.	2018	England	EU	12140	SES	FAS	IV and moderator	food behaviours	consumptions of breakfast/fruits/ vegetables/soft drinks; self-rate health; quality of life	Trend	SES inequality trend: SES was a moderator in the relationship of year and health outcome
119	1	Do societal wealth, family affluence and gender account for trends in adolescent cannabis use? A 30 country cross-national study	ter Bogt, T. F. M., de Looze, M., Molcho, M., Godeau, E., Hublet, A., Kokkevi, A., Kuntsche, E., Gabhainn, S. N., Franelic, I. P., Simons-Morton, B., Sznitman, S., Vieno, A., Vollebergh, W., Pickett, W.	2014	multiple(N=30)	EU+NA	160606	SES	FAS	IV and moderator	Cannabis use	Cannabis use	Trend	SES inequality trend: SES was a moderator in the relationship of year and health outcome
164	1	Socioeconomic inequalities in adolescent health 2002-2010: A time-series analysis of 34 countries participating in the Health Behaviour in School-aged Children study	Elgar, F. J., Pförtner, T. K., Moor, I., De Clercq, B., Stevens, G. W. J. M., Currie, C.	2015	multiple(N=34)	EU+NA	492788	SES	FAS	IV and moderator	Physical activity; BMI; Psychological symptoms; Physical symptoms; Life satisfaction	Physical activity; BMI; HBSC Symptom Checklist; Life satisfaction	Trend	SES inequality trend: SES was a moderator in the relationship of year and health outcome
27	1	Does the association between different dimension of social capital and adolescent smoking vary by socioeconomic status? a pooled cross-national analysis	Pfortner, T. K., De Clercq, B., Lenzi, M., Vieno, A., Rathmann, K., Moor, I., Hublet, A., Molcho, M., Kunst, A. E., Richter, M.	2015	multiple (N=4)	EU+NA	6511	SES; Parental supportive and reciprocal interactions	FAS; Parental support and reciprocity	IV and moderator	Daily smoking	Daily smoking	Sectional	SES- IV and moderator; Family-related social capital - IV
136	1	Adolescent Risk Taking, Neighborhood Social Capital, and Health	Boyce, W. F., Davies, D., Gallupe, O., Shelley, D.	2008	Canada	NA	2288	SES	FAS	IV and moderator	Self-rated health	Self-rated health	Sectional	SES moderated the relationship between health risk behaviours and self-rated health
219	1	Youth injury and parents' unemployment-the importance of socio-economic status and ethnicity context	Maya, S. T., Aviad, T. S., Tanya, K., Orna, B. E., Yossi, H. F.	2020	Israel	ME	13705	SES	Parental employment status; FAS	IV and moderator	Injury	Injury	Sectional	SESinjury is IV, at the same time, it moderated the relationship between parental employment and
41	1	Socioeconomic inequalities in the impact of tobacco control policies on adolescent smoking. A multilevel study in 29 European countries	Pförtner, T. K., Hublet, A., Schnohr, C. W., Rathmann, K., Moor, I., de Looze, M., Baška, T., Molcho, M., Kannas, L., Kunst, A. E., Richter, M.	2016	multiple (N=29)	EU	50338	SES	FAS	IV and moderator	Smoking behaviour	Weekly smoking	Sectional
45	1	The association between family affluence and smoking among 15-year-old adolescents in 33 European countries, Israel and Canada: the role of national wealth	Pfortner, T. K., Moor, I., Rathmann, K., Hublet, A., Molcho, M., Kunst, A. E., Richter, M.	2015	multiple(N=33)	Global	60490	SES	FAS	IV and moderator	Tobacco smoking	Weekly smoking; Early smoking; weekly smoking among former experimenters	Sectional
66	1	Social inequalities in self-rated health: A comparative cross-national study among 32,560 Nordic adolescents	Torsheim, T., Nygren, J. M., Rasmussen, M., Arnarsson, A. M., Bendtsen, P., Schnohr, C. W., Nielsen, L., Nyholm, M.	2018	multiple(N=6)	EU	32560	SES	FAS; subjective family wealth	IV and moderator	Self-rated health	Self-rated health	Sectional
87	1	School- and Family-Level Socioeconomic Status and Health Behaviors: Multilevel Analysis of a National Survey in Wales, United Kingdom	Moore, G. F., Littlecott, H. J.	2015	Wales	EU	9194	SES	FAS	IV and moderator	Health behaviors	smoking; alcohol consumption; fruit and vegetable consumption; physical activity	Sectional
112	1	Emotional and Psychosocial Factors Associated With Drunkenness and the Use of Tobacco and Cannabis in Adolescence: Independent or Interactive Effects?	García-Moya, I., Ortiz Barón, M. J., Moreno, C.	2017	Spain	EU	1752	parental emotional support; communication with parents; parental monitoring; satisfaction with family relationships	parental emotional support; communication with parents; parental monitoring; satisfaction with family relationships	IV and moderator	substance use	drunkenness; tobacco use; cannabisuse	Sectional
153	1	Absolute and relative family affluence and psychosomatic symptoms in adolescents	Elgar, F. J., De Clercq, B., Schnohr, C. W., Bird, P., Pickett, K. E., Torsheim, T., Hofmann, F., Currie, C.	2013	multiple(N=8)	EU+NA	48523	SES	FAS; Yitzhaki Index based on FAS; rank affluence within region or school	IV and moderator	Psychosomatic symptoms	HBSC Symptoms Checklist	Sectional
240	1	A large-scale national study of gambling severity among immigrant and non-immigrant adolescents: The role of the family	Canale, N., Vieno, A., Griffiths, M. D., Borraccino, A., Lazzeri, G., Charrier, L., Lemma, P., Dalmasso, P., Santinello, M.	2017	Italy	EU	1158	Immigrant status; Family structure; SES; Family support	Immigrant status; Biological/adoptive parents; FAS; Family support	IV and moderator	Problem gambling severity	South Oaks Gambling Screen-Revised for Adolescents	Sectional
243		Relative deprivation and disordered gambling in youths	Elgar, F. J., Canale, N., Wohl, M. J. A., Lenzi, M., Vieno, A.	2018	Italy	EU	19321	SES; family support	proportional ranks of FAS; Yitzhaki index based on FAS; family support	IV and moderator	Disordered gambling	South Oaks Gambling Screen-Revised for Adolescents	Sectional
246		Impact of negative life events on positive health in a population of adolescents with special needs, and protective factors	Simoes, C., de Matos, M. G., Tome, G., Ferreira, M.	2008	Portugual	EU	494	Family related resilience resource	Caring Relationships; High Expectations; Meaningful Participation	IV and moderator	Global well-being	Global well-being scale	Sectional
253		What Protects Adolescents with Youth Subculture Affiliation from Excessive Internet Use?	Bobakova, D. F., Holubcikova, J., Geckova, A. M., Veselska, Z. D.	2018	Slovakia	EU	532	SES; Parental monitoring; Family support	Subjective family wealth; Parental monitoring; Family support (subscale of Perceived Social Support Scale)	IV and moderator	Excessive Internet use	Excessive Internet Use Scale	Sectional
259		Fruit and vegetable intake in adolescents: Association with socioeconomic status and exposure to supermarkets and fast food outlets	Svastisalee, C. M., Holstein, B. E., Due, P.	2012	Denmark	EU	6034	SES	Parents’ occupational social class	IV and moderator	Fruit/vegetable consumption	Fruit/vegetable consumption	Sectional
264		How parents can affect excessive spending of time on screen-based activities	Brindova, D., Pavelka, J., Ševčikova, A., Žežula, I., Van Dijk, J. P., Reijneveld, S. A., Geckova, A. M.	2014	multiple(N=2)	EU		Family structure; Screening-time-related parental rules; Family activitiy	Household compostition; Parental restriction of screen related activities; Family activitiy	IV and moderator	Screen-based activities	Screen-based activities	Sectional
270		Persistent social inequality in low life satisfaction among adolescents in Denmark 2002-2018	Holstein, B. E., Damsgaard, M. T., Madsen, K. R., Rasmussen, M.	2020	Denmark	EU	20328	SES	Parents' occupational social class	IV and moderator	Life satisfaction	Life satisfaction	Trend
103	1	Alcohol consumption in adolescence: the role of adolescents? gender, parental control, and family dinners attendance in an Italian HBSC sample	Perasso, G., Carone, N., Barone, L., Celata, C., Coppola, L., Baggio, B., Velasco, V., Lavatelli, M., Gelmi, G., Biffi, L., Marella, M., Pellegrini, C., Perego, O., De Agostini, W., Benedusi, M., Duregon, P., Meconi, A., Zagheno, C., Salinetti, M. V., Salada, M., Mauri, E., Drusetta, V., Use, L. A., Giannellini, A., Di Cosimo, F., Peruzzo, L., Rocco, T. G., Sala, J., Zoppi, C., Artioli, B., Stamp…	2019	Italy	EU	906	Parental monitoring; Family meals	Parental monitoring; Family dinners frequency	mediatior and moderator	Alcohol use	alcohol consumption frequency	Sectional	family control-med; family meal- mod; mod is not sig
254		The role of education, parents and peers in adolescent heavy episodic drinking	Vermeulen-Smit, E., Ter Bogt, T. F. M., Verdurmen, J. E. E., Van Dorsselaer, Safm, Vollebergh, W. A. M.	2012	Netherlands	EU	5169	Parental monitoring; alcohol-drinking-related parental rules	Parental monitoring; Parental rules	mediator	Heavy episodic drinking	Heavy episodic drinking	Sectional
266		The Mediating Effect of Social Controls on Marijuana Use Among Adolescent Bullies, Victims, and Bully-Victims: A Comparison of Various Approaches to Mediation	Cho, S., Norman, L.	2019	US	NA	12642	Parental bonding	Parental bonding	Mediator	Marijuana use	Marijuana use	Sectional
189	1	Is risk-taking behaviour more prevalent among adolescents with learning disabilities?	Palfiova, M., Dankulincova Veselska, Z., Bobakova, D., Holubcikova, J., Cermak, I., Madarasova Geckova, A., Van Dijk, J. P., Reijneveld, S. A.	2017	Slovakia	EU	1517	SES; Family structure	FAS; household composition	Mediator and moderator	Risk behaviours	Early sexual experience; Early smoking initiation; Drunkenness	Sectional
25	1	Time-trends and correlates of obesity in Czech adolescents in relation to family socioeconomic status over a 16-year study period (2002-2018)	Sigmund, E., Sigmundova, D., Badura, P., Voracova, J., Vladimir, H., Hollein, T., Pavelka, J., Puzova, Z., Kalman, M.	2020	Czech	EU	29879	SES	FAS	moderator	Obesity	BMI	Trend	SES inequality trend: SES was a moderator in the relationship of year and health outcome
26	1	Trends and correlates of overweight/obesity in Czech adolescents in relation to family socioeconomic status over a 12-year study period (2002-2014)	Sigmund, E., Badura, P., Sigmundová, D., Voráčová, J., Zacpal, J., Kalman, M., Pavelka, J., Vokacová, J., Hobza, V., Hamrik, Z.	2018	Czech	EU	18250	SES	FAS	moderator	Body weight status	BMI	Trend	SES inequality trend: SES was a moderator in the relationship of year and health outcome
29	1	Body mass index and smoking: cross-sectional study of a representative sample of adolescents in Denmark	Dhariwal, M., Rasmussen, M., Holstein, B. E.	2010	Denmark	EU	2799	SES	Parents’ occupational social class	moderator	Smoking behaviour	Daily smoking	Sectional
238	1	The role of family and computer-mediated communication in adolescent loneliness	Favotto, L., Michaelson, V., Pickett, W., Davison, C.	2019	Canada	NA	30117	Family communication	Family Dynamics Measure II	moderator	Self-perceived loneliness	Self-perceived loneliness	Sectional
