# Supplementary material for: Family Related Variables’ Influences on Adolescents’ Health Based on Health Behaviour in School-Aged Children Database, an AI-Assisted Scoping Review, and Narrative Synthesis
Source: Front Psychol. 2022 Aug 10;13:871795. doi: 10.3389/fpsyg.2022.871795 (PMC9400839; doi:10.3389/fpsyg.2022.871795)
Supplement: Supplementary file 3 [file Table_2.XLSX]

## Sheet: med
Articles that adopted mediation analysis
New ID	Decision	Title	Authors	Publication Year	Country	Area	Sample size	Family Variable	Measurement for family	Family role (IV/Mediator/Moderator)	Children's health outcomes	Measurements for children	Design (Sectional/Trend)	Note
113	1	Socio-demographic variability in adolescent substance use: Mediation by parents and peers	Wang, J., Simons-Morton, B. G., Farhart, T., Luk, J. W.	2009	US	NA	8795	Family structure; SES; parental monitoring	household compositionl; FAS; parental monitoring	IV and mediator	Substance Use	Sdrinking alcohol; being drunk; smoking cigarettes	Sectional	Family structure; family affluence-IV; parental monitoring- mediator
186	1	Family composition and age at menarche: Findings from the international Health Behaviour in School-aged Children study	Steppan, M., Whitehead, R., McEachran, J., Currie, C.	2019	multiple(N=41)	Global	213595	Family member; family wealth	household compostion; FAS; siblings	IV and mediator	Age of menarche	Age of menarche	Sectional	FAS-IV; Family member-mediator
110	1	Family Structure and Adolescent Substance Use: An International Perspective	Hoffmann, J. P.	2017	multiple(N=37)	Global	193202	SES; family structure; communication with parents	FAS; Household composition; communication with parents	IV and mediator	substance use	cigarette/alcohol/cannabis use	Sectional	communication with parents- mediator
254	1	The role of education, parents and peers in adolescent heavy episodic drinking	Vermeulen-Smit, E., Ter Bogt, T. F. M., Verdurmen, J. E. E., Van Dorsselaer, Safm, Vollebergh, W. A. M.	2012	Netherlands	EU	5169	Parental monitoring; alcohol-drinking-related parental rules	Parental monitoring; Parental rules	mediator	Heavy episodic drinking	Heavy episodic drinking	Sectional	parental monitor, parental rule- mediatior
266	1	The Mediating Effect of Social Controls on Marijuana Use Among Adolescent Bullies, Victims, and Bully-Victims: A Comparison of Various Approaches to Mediation	Cho, S., Norman, L.	2019	US	NA	12642	Parental bonding	Parental bonding	Mediator	Marijuana use	Marijuana use	Sectional	parental attachment-mediator
103	1	Alcohol consumption in adolescence: the role of adolescents? gender, parental control, and family dinners attendance in an Italian HBSC sample	Perasso, G., Carone, N., Barone, L., Celata, C., Coppola, L., Baggio, B., Velasco, V., Lavatelli, M., Gelmi, G., Biffi, L., Marella, M., Pellegrini, C., Perego, O., De Agostini, W., Benedusi, M., Duregon, P., Meconi, A., Zagheno, C., Salinetti, M. V., Salada, M., Mauri, E., Drusetta, V., Use, L. A., Giannellini, A., Di Cosimo, F., Peruzzo, L., Rocco, T. G., Sala, J., Zoppi, C., Artioli, B., Stamp…	2019	Italy	EU	906	Parental monitoring; Family meals	Parental monitoring; Family dinners frequency	mediatior and moderator	Alcohol use	alcohol consumption frequency	Sectional	family control-med; family meal- mod; mod is not sig

## Sheet: mod
Articles that adopted moderaion analysis
New ID	Decision	Title	Authors	Publication Year	Country	Area	Sample size	Family Variable	Measurement for family	Family role (IV/Mediator/Moderator)	Children's health outcomes	Measurements for children	Design (Sectional/Trend)	Note
198	1	The Association Between Adolescent Life Satisfaction, Family Structure, Family Affluence and Gender Differences in Parent-Child Communication	Levin, K. A., Dallago, L., Currie, C.	2012	Scotland	EU	5126	Family structure; SES; communication with parents		IV and moderator	Life Satisfaction	Life Satisfaction	Sectional	interaction term between family structure and parent–child communication
239	1	Bullying, family resources, and mental health: A test of the ABC-X theory	Resnick, Elise M.	2014	US	NA	9198	Communication with parents; Seeing parents; Satisfaction with Family Relationships	Communication with parents; Seeing parents; Satisfaction with Family Relationships	IV and moderator	Mental health; Life satisfaction	Mental health; Life satisfaction	Sectional	all family factors are mod
146	1	The influence of parental occupation and the pupils' educational level on lifestyle behaviors among adolescents in Belgium	Vereecken, C. A., Maes, L., De Bacquer, D.	2004	Belgium Flanders	EU	7613	SES	Parental occupational status; children's educational level	IV and moderator	Health lifestyle	food habits; substance use; physical inactivity; dental care	Sectional	But no interaction between SES, gender and age
10	1	Does family communication moderate the association between adverse childhood experiences and emotional and behavioural problems?	Lackova Rebicova, M., Dankulincova Veselska, Z., Husarova, D., Klein, D., Madarasova Geckova, A., Van Dijk, J. P., Reijneveld, S. A.	2020	Slovakia	EU	5202	Communication with parents	Communication with mother; Communication with father	IV and moderator	Internalizing and externalizing problems	Strengths and Difficulties Questionnaire	Sectional	communication mod
174	1	Protective roles of home and school environments for the health of young Canadians	Freeman, J., King, M., Kuntsche, E., Pickett, W.	2011	Canada	NA	5368	Family environment	Parental understanding; Parental trust; communication with parents; happiness of home life	IV and moderator	psychosomatic symptoms; serious injuries	HBSC Symptom Checklist; serious injuries	Trend	Family environment is a composite concept; Interaction between family environment and school environment
236	1	Do social support and eating family meals together play a role in promoting resilience to bullying and cyberbullying in Scottish school children?	Shaw, R. J., Currie, D. B., Smith, G. S., Brown, J., Smith, D. J., Inchley, J. C.	2019	Scotland	EU	2581	Family meals	Family meals	IV and moderator	subjective wellbeing		Sectional	family meal: moderator for cyberbullying experience, but not sig
135	1	Portuguese Adolescents: the Importance of Parents and Peer Groups in Positive Health	Tome, G., de Matos, M. G., Camacho, I., Simoes, C., Diniz, J. A.	2012	Portugual	EU	3636	Communication with Parents	Communication with Parents	IV and moderator	subjective health complaints	HBSC Symptom Checklist	Sectional	Family moderated peer communication effects
175	1	School composition, school culture and socioeconomic inequalities in young people's health: Multi-level analysis of the Health Behaviour in School-aged Children (HBSC) survey in Wales	Moore, G. F., Littlecott, H. J., Evans, R., Murphy, S., Hewitt, G., Fletcher, A.	2017	Wales	EU	9055	SES	FAS	IV and moderator	Health behaviours	physical activity; fruit and vegetable consumption; tobacco/ alcohol/cannabis use	Sectional	Family SES moderated school-level SES
168	1	Irregular breakfast consumption in adolescence and the family environment: Underlying causes by family structure	Levin, K. A., Kirby, J.	2012	Scotland	EU	16406	Family structure; SES; Seeing parents; Perceived parenting; Communication with parents; Communication with siblings	Household composition; FAS; Contact with parents; Perceived parenting; Communication with parents; Communication with siblings	IV and moderator	Irregular breakfast consumption	Daily breakfast consumption	Sectional	Family structure was a moderator
275		Communication in single- and two-parent families and their influence on Portuguese and Spanish adolescents’ life satisfaction	Camacho, I., Jiménez-Iglesias, A., Rivera, F., Moreno, C., Gaspar de Matos, M.	2020	multiple(N=2)	EU	24070	Family structure; communication with parents	Household composition; communication with parents	IV and moderator	Life satisfaction	Life satisfaction	Sectional	Family structure was a moderator, communication was a IV
117	1	School, Peer and Family Relationships and Adolescent Substance Use, Subjective Wellbeing and Mental Health Symptoms in Wales: a Cross Sectional Study	Moore, G. F., Cox, R., Evans, R. E., Hallingberg, B., Hawkins, J., Littlecott, H. J., Long, S. J., Murphy, S.	2018	Wales	EU	8009	family support; family communication	family support; family communication	IV and moderator	substance use; subjective wellbeing; mental health symptoms	tobacco use; cannabis use; alcohol use; subjective wellbeing; HBSC-Symptom checklist	Sectional	Family support-mod
197	1	The interplay between national and parental unemployment in relation to adolescent life satisfaction in 27 countries: Analyses of repeated cross-sectional school surveys	Johansson, K., Petersen, S., Högberg, B., Stevens, G. W. J. M., De Clercq, B., Frasquilho, D., Elgar, F., Strandh, M.	2019	multiple(N=27)	Global	386402	SES; Family structure	Parental unemployment; Family structure	IV and moderator	Life satisfaction	Life satisfaction	Sectional	family-level factor moderated country-level factor
271		Association of alcohol control policies with adolescent alcohol consumption and with social inequality in adolescent alcohol consumption: A multilevel study in 33 countries and regions	Leal-López, E., Moreno-Maldonado, C., Inchley, J., Deforche, B., Van Havere, T., Van Damme, J., Buijs, T., Sánchez-Queija, I., Currie, D., Vieno, A., De Clercq, B.	2020	multiple(N=33)	EU+NA	671084	SES	FAS; Subjective family wealth	IV and moderator	alcohol consumption	alcohol consumption	Sectional	FAS was IV, as well as moderator
244		Supportive communication with parents moderates the negative effects of electronic media use on life satisfaction during adolescence	Boniel-Nissim, M., Tabak, I., Mazur, J., Borraccino, A., Brooks, F., Gommans, R., van der Sluijs, W., Zsiros, E., Craig, W., Harel-Fisch, Y., Finne, E.	2015	multiple(N=9)	EU+NA	53973	SES; Family structure; Communication with parents	FAS; Family structure; Communication with parents;	IV and moderator	Life satisfaction	Life satisfaction	Sectional	FAS, Family structure--IV; Communication with parents-- moderator
143	1	Psychosocial working conditions: An analysis of emotional symptoms and conduct problems amongst adolescent students	Plenty, S., Ostberg, V., Almquist, Y. B., Augustine, L., Modin, B.	2014	Sweden	EU	3685	School-related parental support	School-related parental support	IV and moderator	Emotional symptoms and conduct problems	The Strengths and Difficulties Questionnaire	Sectional	However, parental support did not moderate the effect of school demand significantly
257		Socioeconomic disparities in diet vary according to migration status among adolescents in Belgium	Rouche, M., De Clercq, B., Lebacq, T., Dierckens, M., Moreau, N., Desbouys, L., Godin, I., Castetbon, K.	2019	Belgium	EU	19172	Immigrant status; SES; Family structure	Immigrant status; Family affluence; Parental employment; Household composition; Siblings	IV and moderator	Food Frequency	Food Frequency Scale	Sectional	Immigrant status -- moderator
123	1	Parents, teachers and peer relations as predictors of risk behaviors and mental well-being among immigrant and Israeli born adolescents	Walsh, S. D., Harel-Fisch, Y., Fogel-Grinvald, H.	2010	Ireland	EU	7866	Immigrant status; Communication with parents; Family activity; Parental monitoring; School-related parental support	Immigrant status; Communication with parents; Family activity; Parental monitoring; School-related parental support	IV and moderator	Health risk behaviours; Wellbeing	Smoking; Drinking; HBSC Symptoms Checklist	Sectional	Immigrant status -- moderator; Relationship with parents --IV
148	1	Mental Health in Adolescents with a Migration Background in 29 European Countries: The Buffering Role of Social Capital	Delaruelle, K., Walsh, S. D., Dierckens, M., Deforche, B., Kern, M. R., Currie, C., Maldonado, C. M., Cosma, A., Stevens, G. W. J. M.	2021	multiple(N=29)	EU	121751	Immigrant status; Family support	Immigrant status; Family support	IV and moderator	Mental health	Life dissatisfaction; HBSC Symptoms Checklist	Sectional	Interaction between immigrant status and family support
65	1	Socioeconomic inequalities in health among Swedish adolescents - adding the subjective perspective	Ahlborg, M., Svedberg, P., Nyholm, M., Morgan, A., Nygren, J. M.	2017	Sweden	EU	23008	SES	subjective family wealth; FAS	IV and moderator	self-rated health	subjective health complaints; lifesatisfaction; health perception	Trend	Interaction between SES and gender
276		The role of community social capital in the relationship between socioeconomic status and adolescent life satisfaction: mediating or moderating? Evidence from Czech data	Buijs, T., Maes, L., Salonna, F., Van Damme, J., Hublet, A., Kebza, V., Costongs, C., Currie, C., De Clercq, B.	2016	Czech	EU	4425	SES	FAS; subjective family wealth	IV and moderator	Life satisfaction	Life satisfaction	Sectional	Interaction between SES and social capital
91	1	Adolescent Socioeconomic Status and Mental Health Inequalities in the Netherlands, 2001-2017	Weinberg, D., Stevens, Gwjm, Duinhof, E. L., Finkenauer, C.	2019	Netherlands	EU	27020	SES	FAS; subjective family wealth; personal education level	IV and moderator	Mental Health Problems	Strengths and Difficulties Questionnaire; life satisfaction	Trend	Interaction between subjective SES and parental SES; interaction between subjective/parental SES and years
260		Exploring Whether Talking With Parents, Siblings, and Friends Moderates the Association Between Peer Victimization and Adverse Psychosocial Outcomes	Hong, J. S., Zhang, S., Gonzalez-Prendes, A. A., Albdour, M.	2020	US	NA	12642	Family structure; SES; communication with parents; communication with siblings	Family structure; subjective family wealth; communication with parents; communication with siblings	IV and moderator	alcohol/tobacco use; delinquent friend affiliation; internalizing problems	alcohol/tobacco use; delinquent friend affiliation; HBSC Symptom Checklist	Sectional	Interaction ParentCommunication*peer
108	1	The Role of the Family in Promoting Responsible Substance Use in Adolescence	Jimenez-Iglesias, A., Moreno, C., Rivera, F., Garcia-Moya, I.	2013	Spain	EU	14825	Parental emotional support; Parental Promotion of Autonomy; Family Activity; Parental monitoring; Sources of parental knowledge	Parental Bonding Inventory-Brief Current Form; Family Activities; Parental monitoring; Perceived Sources of Parental Knowledge	IV and moderator	Substance Use	cigarette/alcohol/cannabis use	Sectional	moderator: parental emotional support, autonomy promotion, parental monitoring, family activity
109	1	What family dimensions are important for health-related quality of life in adolescence?	Jimenez-Iglesias, A., Moreno, C., Ramos, P., Rivera, F.	2015	Spain	EU	14825	Parental emotional support; Parental Promotion of Autonomy; Family Activity; Parental monitoring; Sources of Parental Knowledge	Parental Bonding Inventory-Brief Current Form; Family Activities; Parental monitoring; Perceived Sources of Parental Knowledge	IV and moderator	Health-related quality of life	KIDSCREEN-10 index questionnaire	Sectional	moderator: parental emotional support, autonomy promotion, parental monitoring, family activity
138	1	Factors affecting the well-being of adolescents living with unemployed parents in times of economic recession: findings from the Portuguese HBSC study	Frasquilho, D., de Matos, M. G., Marques, A., Gaspar, T., Caldas-de-Almeida, J. M.	2017	Portugual	EU	1311	SES; Satisfaction with the family relationships	Parental employment; FAS; Satisfaction with the family life	IV and moderator	Emotional well-being	single-item self-rated health scale	Sectional	Parental employment-- IV; SES --IV; Satisfaction with the family life-- moderator
150	1	Social Capital as a Moderator of the Relationship Between Perceived Discrimination and Alcohol and Cannabis Use Among Immigrant and Non-immigrant Adolescents in Israel	Walsh, S. D., Kolobov, T., Harel-Fisch, Y.	2018	Israel	ME	8598	Parental monitoring; SES; Immigrant status	Parental monitoring; FAS; Immigrant status	IV and moderator	Substance Use	Alcohol/cannabis use	Sectional	Parental monitoring- IV and mod; SES, Immigrant status--IV
141	1	Psychosocial work environment in school and students' somatic health complaints: An analysis of buffering resources	Sonmark, K., Modin, B.	2017	Sweden	EU	9427	School-related parental support	School-related parental support	IV and moderator	Somatic health	HBSC symptom checklist	Sectional	Parental support was IV, also moderated the relationship between DV and school demand
85	1	Close relations to parents and emotional symptoms among adolescents: beyond socio-economic impact?	Damsgaard, M. T., Holstein, B. E., Koushede, V., Madsen, K. R., Meilstrup, C., Nelausen, M. K., Nielsen, L., Rayce, S. B.	2014	Denmark	EU	15646	Communication with parents; SES	Communication with parents; parents' occupational class	IV and moderator	Emotional symptoms	HBSC Symptom Check List	Sectional	Relationship - IV; SES - moderator
61	1	Family structure and breakfast consumption of 11-15 year old boys and girls in Scotland, 1994-2010: a repeated cross-sectional study	Levin, K. A., Kirby, J., Currie, C.	2012	Scotland	EU	26626	Family structure	Household composition	IV and moderator	Breakfast consumption	Daily breakfast consumption	Trend	inequality trend: Family structure was a moderator in the relationship of year and health outcome
7	1	Social inequality in adolescent daily smoking: Has it changed over time?	Rasmussen, M., Due, P., Damsgaard, M. T., Holstein, B. E.	2009	Denmark	EU	6703	SES	Parents’ occupational social class	IV and moderator	Smoking behaviour	Daily smoking	Trend	SES inequality trend: SES was a moderator in the relationship of year and health outcome
11	1	Trends in socioeconomic differences in daily smoking among 15-year-old Danes 1991-2014	Holstein, B. E., Andersen, A., Damsgaard, M. T., Due, P., Bast, L. S., Rasmussen, M.	2020	Denmark	EU	8641	SES	Parents’ occupational social class	IV and moderator	Smoking	Daily smoking	Trend	SES inequality trend: SES was a moderator in the relationship of year and health outcome
13	1	Brief report: Trends in social inequality in drunkenness among Danish adolescents, 1991–2014	Bendtsen, Pernille, Andersen, Anette, Damsgaard, Mogens Trab, Due, Pernille, Rasmussen, Mette, Holstein, Bjørn E.	2018	Denmark	EU	8655	SES	Parents’ occupational social class	IV and moderator	Frequency of drunkenness	Frequency of drunkenness	Trend	SES inequality trend: SES was a moderator in the relationship of year and health outcome
15	1	Increasing prevalence of emotional symptoms in higher socioeconomic strata: Trend study among Danish schoolchildren 1991–2014	Due, P., Damsgaard, M. T., Madsen, K. R., Nielsen, L., Rayce, S. B., Holstein, B. E.	2019	Denmark	EU	31169	SES	Parents’ occupational social class	IV and moderator	Emotional symptoms	HBSC Symptom Check List	Trend	SES inequality trend: SES was a moderator in the relationship of year and health outcome
16	1	Trends in social inequality in physical inactivity among Danish adolescents 1991–2014	Johnsen, N. F., Toftager, M., Melkevik, O., Holstein, B. E., Rasmussen, M.	2017	Denmark	EU	30974	SES	Parents’ occupational social class	IV and moderator	Physical inactivity	Vigorous physical activity	Trend	SES inequality trend: SES was a moderator in the relationship of year and health outcome
17	1	Persistent social inequality in medicine use for headache among adolescents in Denmark 1991–2014	Holstein, B. E., Denbæk, A. M., Andersen, A., Due, P.	2019	Denmark	EU	26685	SES	Parents’ occupational social class	IV and moderator	Headache	Medication for headache	Trend	SES inequality trend: SES was a moderator in the relationship of year and health outcome
18	1	Trends in social inequality in overweight and obesity among adolescents in Denmark 1998-2018	Rasmussen, M., Damsgaard, M. T., Morgen, C. S., Kierkegaard, L., Toftager, M., Rosenwein, S. V., Krolner, R. F., Due, P., Holstein, B. E.	2020	Denmark	EU	22177	SES	Parents’ occupational social class	IV and moderator	Overweight and obesity	BMI	Trend	SES inequality trend: SES was a moderator in the relationship of year and health outcome
21	1	Persistent social inequality in low intake of vegetables among adolescents, 2002-2014	Rasmussen, M., Pedersen, T. P., Johnsen, N. F., Krolner, R. F., Holstein, B. E.	2018	Denmark	EU	17243	SES	Parents’ occupational social class	IV and moderator	Vegetable intake	Vegetable intake frequency	Trend	SES inequality trend: SES was a moderator in the relationship of year and health outcome
23	1	Intake of sugar sweetened soft drinks among adolescents: Trends and social inequality in Denmark 2002-2018	Holstein, B. E., Damsgaard, M. T., Due, P., Krølner, R. F., Pedersen, T. P., Rasmussen, M.	2020	Denmark	EU	20112	SES	Occupational Social Class; FAS	IV and moderator	Sugar sweetened soft drinks intake	HBSC food frequency questionnaire	Trend	SES inequality trend: SES was a moderator in the relationship of year and health outcome
24	1	Recurrent abdominal pain among adolescents: Trends and social inequality 1991-2018	Holstein, B. E., Damsgaard, M. T., Ammitzbøll, J., Madsen, K. R., Pedersen, T. P., Rasmussen, M.	2021	Denmark	EU	30048	SES	Parents’ occupational social class	IV and moderator	Recurrent abdominal pain	HBSC stomach-ache symptom check	Trend	SES inequality trend: SES was a moderator in the relationship of year and health outcome
40	1	Trends in socio-economic differences in tobacco smoking among German schoolchildren, 1994-2002	Richter, M., Leppin, A.	2007	Germany	EU	11401	SES	FAS	IV and moderator	Tobacco smoking	Weekly smoking	Trend	SES inequality trend: SES was a moderator in the relationship of year and health outcome
46	1	Social Determinants of Smoking, Alcohol and Drug Use Among Lithuanian School-Aged Children: Results From 5 Consecutive HBSC Surveys, 1994-2010	Sumskas, L., Zaborskis, A., Grabauskas, V.	2012	Lithuania	EU	26556	SES; Family structure	Subjective family wealth; Household composition	IV and moderator	Substance use	Tobacco/Alcohol/Cannabis use	Trend	SES inequality trend: SES was a moderator in the relationship of year and health outcome
49	1	Socioeconomic differences in the use of alcohol and drunkenness in adolescents: Trends in the Health Behaviour in School-aged Children study in Finland 1990–2014	Liu, Y., Lintonen, T., Tynjälä, J., Villberg, J., Välimaa, R., Ojala, K., Kannas, L.	2018	Finland	EU	11126	SES	Educational aspiration; Subjective family wealth	IV and moderator	Alcohol use; Drunkenness	Alcohol use frequency; Drunkenness	Trend	SES inequality trend: SES was a moderator in the relationship of year and health outcome
50	1	Trends in socioeconomic inequalities in adolescent alcohol use in Germany between 1994 and 2006	Richter, M., Kuntsche, E., De Looze, M., Pförtner, T. K.	2013	Germany	EU	5074	SES	FAS; Educational track	IV and moderator	Weekly alcohol use	Weekly alcohol use	Trend	SES inequality trend: SES was a moderator in the relationship of year and health outcome
55	1	Family Affluence and the Eating Habits of 11-to 15-Year-Old Czech Adolescents: HBSC 2002 and 2014	Voracova, J., Sigmund, E., Sigmundova, D., Kalman, M.	2016	Czech	EU	10831	SES	FAS	IV and moderator	Eating Habits	fruit/vegetables/sweetened soft drinks/sweets consumption	Trend	SES inequality trend: SES was a moderator in the relationship of year and health outcome
57	1	Vigorous physical activity in relation to family affluence: time trends in Europe and North America	Sigmundová, D., Sigmund, E., Tesler, R., Ng, K. W., Hamrik, Z., Mathisen, F. K. S., Inchley, J., Bucksch, J.	2019	multiple(N=34)	EU+NA	501647	SES	FAS	IV and moderator	Vigorous physical activity	Vigorous physical activity	Trend	SES inequality trend: SES was a moderator in the relationship of year and health outcome
90	1	Changing trends in young people’s food behaviour and wellbeing in England in relation to family affluence between 2005 and 2014	Simon, A., Owen, C., O’Connell, R., Brooks, F.	2018	England	EU	12140	SES	FAS	IV and moderator	food behaviours	consumptions of breakfast/fruits/ vegetables/soft drinks; self-rate health; quality of life	Trend	SES inequality trend: SES was a moderator in the relationship of year and health outcome
119	1	Do societal wealth, family affluence and gender account for trends in adolescent cannabis use? A 30 country cross-national study	ter Bogt, T. F. M., de Looze, M., Molcho, M., Godeau, E., Hublet, A., Kokkevi, A., Kuntsche, E., Gabhainn, S. N., Franelic, I. P., Simons-Morton, B., Sznitman, S., Vieno, A., Vollebergh, W., Pickett, W.	2014	multiple(N=30)	EU+NA	160606	SES	FAS	IV and moderator	Cannabis use	Cannabis use	Trend	SES inequality trend: SES was a moderator in the relationship of year and health outcome
164	1	Socioeconomic inequalities in adolescent health 2002-2010: A time-series analysis of 34 countries participating in the Health Behaviour in School-aged Children study	Elgar, F. J., Pförtner, T. K., Moor, I., De Clercq, B., Stevens, G. W. J. M., Currie, C.	2015	multiple(N=34)	EU+NA	492788	SES	FAS	IV and moderator	Physical activity; BMI; Psychological symptoms; Physical symptoms; Life satisfaction	Physical activity; BMI; HBSC Symptom Checklist; Life satisfaction	Trend	SES inequality trend: SES was a moderator in the relationship of year and health outcome
27	1	Does the association between different dimension of social capital and adolescent smoking vary by socioeconomic status? a pooled cross-national analysis	Pfortner, T. K., De Clercq, B., Lenzi, M., Vieno, A., Rathmann, K., Moor, I., Hublet, A., Molcho, M., Kunst, A. E., Richter, M.	2015	multiple (N=4)	EU+NA	6511	SES; Parental supportive and reciprocal interactions	FAS; Parental support and reciprocity	IV and moderator	Daily smoking	Daily smoking	Sectional	SES- IV and moderator; Family-related social capital - IV
136	1	Adolescent Risk Taking, Neighborhood Social Capital, and Health	Boyce, W. F., Davies, D., Gallupe, O., Shelley, D.	2008	Canada	NA	2288	SES	FAS	IV and moderator	Self-rated health	Self-rated health	Sectional	SES moderated the relationship between health risk behaviours and self-rated health
219	1	Youth injury and parents' unemployment-the importance of socio-economic status and ethnicity context	Maya, S. T., Aviad, T. S., Tanya, K., Orna, B. E., Yossi, H. F.	2020	Israel	ME	13705	SES	Parental employment status; FAS	IV and moderator	Injury	Injury	Sectional	SESinjury is IV, at the same time, it moderated the relationship between parental employment and
41	1	Socioeconomic inequalities in the impact of tobacco control policies on adolescent smoking. A multilevel study in 29 European countries	Pförtner, T. K., Hublet, A., Schnohr, C. W., Rathmann, K., Moor, I., de Looze, M., Baška, T., Molcho, M., Kannas, L., Kunst, A. E., Richter, M.	2016	multiple (N=29)	EU	50338	SES	FAS	IV and moderator	Smoking behaviour	Weekly smoking	Sectional	SES-mod
45	1	The association between family affluence and smoking among 15-year-old adolescents in 33 European countries, Israel and Canada: the role of national wealth	Pfortner, T. K., Moor, I., Rathmann, K., Hublet, A., Molcho, M., Kunst, A. E., Richter, M.	2015	multiple(N=33)	Global	60490	SES	FAS	IV and moderator	Tobacco smoking	Weekly smoking; Early smoking; weekly smoking among former experimenters	Sectional	SES-mod
66	1	Social inequalities in self-rated health: A comparative cross-national study among 32,560 Nordic adolescents	Torsheim, T., Nygren, J. M., Rasmussen, M., Arnarsson, A. M., Bendtsen, P., Schnohr, C. W., Nielsen, L., Nyholm, M.	2018	multiple(N=6)	EU	32560	SES	FAS; subjective family wealth	IV and moderator	Self-rated health	Self-rated health	Sectional	SES-mod
87	1	School- and Family-Level Socioeconomic Status and Health Behaviors: Multilevel Analysis of a National Survey in Wales, United Kingdom	Moore, G. F., Littlecott, H. J.	2015	Wales	EU	9194	SES	FAS	IV and moderator	Health behaviors	smoking; alcohol consumption; fruit and vegetable consumption; physical activity	Sectional	SES-mod
112	1	Emotional and Psychosocial Factors Associated With Drunkenness and the Use of Tobacco and Cannabis in Adolescence: Independent or Interactive Effects?	García-Moya, I., Ortiz Barón, M. J., Moreno, C.	2017	Spain	EU	1752	parental emotional support; communication with parents; parental monitoring; satisfaction with family relationships	parental emotional support; communication with parents; parental monitoring; satisfaction with family relationships	IV and moderator	substance use	drunkenness; tobacco use; cannabisuse	Sectional	Emotional control × depression; Parent–child relationships × peers’conventional behavior
153	1	Absolute and relative family affluence and psychosomatic symptoms in adolescents	Elgar, F. J., De Clercq, B., Schnohr, C. W., Bird, P., Pickett, K. E., Torsheim, T., Hofmann, F., Currie, C.	2013	multiple(N=8)	EU+NA	48523	SES	FAS; Yitzhaki Index based on FAS; rank affluence within region or school	IV and moderator	Psychosomatic symptoms	HBSC Symptoms Checklist	Sectional	SES-mod
240	1	A large-scale national study of gambling severity among immigrant and non-immigrant adolescents: The role of the family	Canale, N., Vieno, A., Griffiths, M. D., Borraccino, A., Lazzeri, G., Charrier, L., Lemma, P., Dalmasso, P., Santinello, M.	2017	Italy	EU	1158	Immigrant status; Family structure; SES; Family support	Immigrant status; Biological/adoptive parents; FAS; Family support	IV and moderator	Problem gambling severity	South Oaks Gambling Screen-Revised for Adolescents	Sectional	SES * Immigrant status
243		Relative deprivation and disordered gambling in youths	Elgar, F. J., Canale, N., Wohl, M. J. A., Lenzi, M., Vieno, A.	2018	Italy	EU	19321	SES; family support	proportional ranks of FAS; Yitzhaki index based on FAS; family support	IV and moderator	Disordered gambling	South Oaks Gambling Screen-Revised for Adolescents	Sectional	SES ×family support
246		Impact of negative life events on positive health in a population of adolescents with special needs, and protective factors	Simoes, C., de Matos, M. G., Tome, G., Ferreira, M.	2008	Portugual	EU	494	Family related resilience resource	Caring Relationships; High Expectations; Meaningful Participation	IV and moderator	Global well-being	Global well-being scale	Sectional	Family resources-mod
253		What Protects Adolescents with Youth Subculture Affiliation from Excessive Internet Use?	Bobakova, D. F., Holubcikova, J., Geckova, A. M., Veselska, Z. D.	2018	Slovakia	EU	532	SES; Parental monitoring; Family support	Subjective family wealth; Parental monitoring; Family support (subscale of Perceived Social Support Scale)	IV and moderator	Excessive Internet use	Excessive Internet Use Scale	Sectional	Subculture Affiliation × Family support/Parental monitoring
259		Fruit and vegetable intake in adolescents: Association with socioeconomic status and exposure to supermarkets and fast food outlets	Svastisalee, C. M., Holstein, B. E., Due, P.	2012	Denmark	EU	6034	SES	Parents’ occupational social class	IV and moderator	Fruit/vegetable consumption	Fruit/vegetable consumption	Sectional	SES-mod
264		How parents can affect excessive spending of time on screen-based activities	Brindova, D., Pavelka, J., Ševčikova, A., Žežula, I., Van Dijk, J. P., Reijneveld, S. A., Geckova, A. M.	2014	multiple(N=2)	EU		Family structure; Screening-time-related parental rules; Family activitiy	Household compostition; Parental restriction of screen related activities; Family activitiy	IV and moderator	Screen-based activities	Screen-based activities	Sectional	parental rule-mod
270		Persistent social inequality in low life satisfaction among adolescents in Denmark 2002-2018	Holstein, B. E., Damsgaard, M. T., Madsen, K. R., Rasmussen, M.	2020	Denmark	EU	20328	SES	Parents' occupational social class	IV and moderator	Life satisfaction	Life satisfaction	Trend	SES inequality trend: SES was a moderator in the relationship of year and health outcome
25	1	Time-trends and correlates of obesity in Czech adolescents in relation to family socioeconomic status over a 16-year study period (2002-2018)	Sigmund, E., Sigmundova, D., Badura, P., Voracova, J., Vladimir, H., Hollein, T., Pavelka, J., Puzova, Z., Kalman, M.	2020	Czech	EU	29879	SES	FAS	moderator	Obesity	BMI	Trend	SES inequality trend: SES was a moderator in the relationship of year and health outcome
26	1	Trends and correlates of overweight/obesity in Czech adolescents in relation to family socioeconomic status over a 12-year study period (2002-2014)	Sigmund, E., Badura, P., Sigmundová, D., Voráčová, J., Zacpal, J., Kalman, M., Pavelka, J., Vokacová, J., Hobza, V., Hamrik, Z.	2018	Czech	EU	18250	SES	FAS	moderator	Body weight status	BMI	Trend	SES inequality trend: SES was a moderator in the relationship of year and health outcome
29	1	Body mass index and smoking: cross-sectional study of a representative sample of adolescents in Denmark	Dhariwal, M., Rasmussen, M., Holstein, B. E.	2010	Denmark	EU	2799	SES	Parents’ occupational social class	moderator	Smoking behaviour	Daily smoking	Sectional	SES-mod
238	1	The role of family and computer-mediated communication in adolescent loneliness	Favotto, L., Michaelson, V., Pickett, W., Davison, C.	2019	Canada	NA	30117	Family communication	Family Dynamics Measure II	moderator	Self-perceived loneliness	Self-perceived loneliness	Sectional	Family communication quality -mod
103	1	Alcohol consumption in adolescence: the role of adolescents? gender, parental control, and family dinners attendance in an Italian HBSC sample	Perasso, G., Carone, N., Barone, L., Celata, C., Coppola, L., Baggio, B., Velasco, V., Lavatelli, M., Gelmi, G., Biffi, L., Marella, M., Pellegrini, C., Perego, O., De Agostini, W., Benedusi, M., Duregon, P., Meconi, A., Zagheno, C., Salinetti, M. V., Salada, M., Mauri, E., Drusetta, V., Use, L. A., Giannellini, A., Di Cosimo, F., Peruzzo, L., Rocco, T. G., Sala, J., Zoppi, C., Artioli, B., Stamp…	2019	Italy	EU	906	Parental monitoring; Family meals	Parental monitoring; Family dinners frequency	mediatior and moderator	Alcohol use	alcohol consumption frequency	Sectional	family control-med; family meal- mod; mod is not sig

## Sheet: Med a Mod
Articles that adopted both mediation and moderation analysis
New ID	Decision	Title	Authors	Publication Year	Country	Area	Sample size	Family Variable	Measurement for family	Family role (IV/Mediator/Moderator)	Children's health outcomes	Measurements for children	Design (Sectional/Trend)	Note
189	1	Is risk-taking behaviour more prevalent among adolescents with learning disabilities?	Palfiova, M., Dankulincova Veselska, Z., Bobakova, D., Holubcikova, J., Cermak, I., Madarasova Geckova, A., Van Dijk, J. P., Reijneveld, S. A.	2017	Slovakia	EU	1517	SES; Family structure	FAS; household composition	Mediator and moderator	Risk behaviours	Early sexual experience; Early smoking initiation; Drunkenness	Sectional
