# Supplementary material for: Family Related Variables’ Influences on Adolescents’ Health Based on Health Behaviour in School-Aged Children Database, an AI-Assisted Scoping Review, and Narrative Synthesis
Source: Front Psychol. 2022 Aug 10;13:871795. doi: 10.3389/fpsyg.2022.871795 (PMC9400839; doi:10.3389/fpsyg.2022.871795)
Supplement: Supplementary file 5 [file Table_4.XLSX]

## Sheet: Sheet1
Synthesis of articles using household composition to describe family structure
New ID	Decision	Title	Authors	Publication Year	Country	Area	Sample size	Family Variable	Measurement for family	Family role (IV/Mediator/Moderator)	Children's health outcomes	Measurements for children	Design (Sectional/Trend)	Note
4	1	Socioeconomic and behavioral determinants of tooth brushing frequency: results from the representative French 2010 HBSC cross-sectional study	de Grado, G. F., Ehlinger, V., Godeau, E., Sentenac, M., Arnaud, C., Nabet, C., Monsarrat, P.	2018	France	EU	7567	SES; Family structure; Relationships with parents; School-related parental support	FAS; Perceived family wealth; Both parents of high socio-professional category; Household composition; Communication with parents; Parental monitoring; Parental bonding; Number of children in family; School-related parental support	IV	Tooth brushing	Tooth brushing	Sectional	"relationship with parents": a composite variable
5	1	Mental health problems in early adolescents in the Netherlands	Vollebergh, W. A. M., van Dorsselaer, S., Monshouwer, K., Verdurmen, J., van der Ende, J., ter Bogt, T.	2006	Netherlands; Bergen; Norway (Dutch Children)	EU	7556	Immigrant status; SES; Family structure	Immigrant status; FAS; Employment status of parents ; Household composition	IV	Mental health;	YSR	Sectional
8	1	Individual and social determinants of early sexual activity: A study of gender-based differences using the 2018 Canadian Health Behaviour in School-aged Children Study (HBSC)	Gazendam, N., Cleverley, K., King, N., Pickett, W., Phillips, S. P.	2020	Canada	NA	6154	SES; Family support; Family structure	Subjective family wealth; Family support; Household composition	IV	Early Sexual Activity	Sexual activity	Sectional
20	1	What role do family composition and functioning play in emotional and behavioural problems among adolescent boys and girls?	Paclikova, K., Dankulincova Veselska, Z., Filakovska Bobakova, D., Palfiova, M., Madarasova Geckova, A.	2019	Slovakia	EU	2908	Family structure; Family support; Family communication; SES	Household composition; Multidimensional Scale of Perceived Social Support; family communication; FAS	IV	Internalizing and externalizing problems	Strengths and Difficulties Questionnaire	Sectional
31	1	Emotional symptoms among adolescents: epidemiological analysis of individual-, classroom- and school-level factors	Meilstrup, C., Ersboll, A. K., Nielsen, L., Koushede, V., Bendtsen, P., Due, P., Holstein, B. E.	2015	Denmark	EU	4032	Family structure; Immigrant status; SES	Household composition; Migration status; Parents’ occupational social class	IV	Emotional symptoms	HBSC Symptom Check List	Sectional
32	1	Associations of behavioural, psychosocial and socioeconomic factors with over- and underweight among German adolescents	Mikolajczyk, R. T., Richter, M.	2008	Germany	EU	5650	Family structure; SES; communication with parents	Household composition; Parents’ occupational social class ; FAS; communication with parents	IV	Underweight/overweight	BMI	Sectional	SES had two indicators: FAS and parents' OSC
34	1	Familial determinants of current smoking among adolescents of Lithuania: a cross-sectional survey 2014	Zaborskis, A., Sirvyte, D.	2015	Lithuania	EU	3696	SES; Family structure; Communication with parents; Family communication; Satisfaction with family relationships; Parental monitoring; Parental emotional support; Parental promotion of autonomy; Family time together; School-related parental support; Parenting style; Electronic media communication with parents; Seeing of parents	FAS; Household composition; Communication with parents;Short Version of Family Dynamics Measure II; Satisfaction with family relationships; Parental monitoring; Parental bonding (two-dimension); Joint family activity; School-related parental support; Parental disciplinary styles measurement; Electronic media communication with parents; Seeing of parents	IV	Smoking behaviour	Smoking behaviour	Sectional
37	1	Socioeconomic inequalities in adolescent smoking across 35 countries: A multilevel analysis of the role of family, school and peers	Moor, I., Rathmann, K., Lenzi, M., Pförtner, T. K., Nagelhout, G. E., De Looze, M., Bendtsen, P., Willemsen, M., Kannas, L., Kunst, A. E., Richter, M.	2015	multiple(N=35)	Global	52907	SES; Communication with parents; Family structure	FAS; Communication with parents; Household composition	IV	Tobacco smoking	Weekly smoking	Sectional
42	1	The effect of structural and functional social relations on smoking among adolescents - data from HBSC Greenland 2018	Hansen, S. K., Holm, L. A. B., Niclasen, B. V. L., Schnohr, C.	2020	Greenland	EU	2118	Family structure	Household composition	IV	Smoking behaviour	Smoking behaviour	Sectional
43	1	Family as a child development context and smoking behaviour among schoolchildren in Greenland	Granado Alcon, M. C., Pedersen, J. M.	2001	Greenland	EU	1648	SES; Family structure	Father's occupational social class; Household composition; Biological/broken/restructured family	IV	Smoking behaviour	Smoking frequency	Sectional
51	1	Family Social Environment and Parenting Predictors of Alcohol Use among Adolescents in Lithuania	Sumskas, L., Zaborskis, A.	2017	Lithuania	EU	3715	Family structure; SES; Satisfaction with family relationships; Communication with parents; Parental monitoring; Family communication; school-related parental support; Parental emotional support; Parenting style; Family activity; Electronic media communication with parents; Seeing parents	Household composition; FAS; Satisfaction with family relationships; Communication with parents; Parental monitoring; Quality of communication with family; school-related parental support; Parental emotional support; Parenting style; Family time together; Electronic media communication with parents; Seeing parents	IV	Weekly alcohol use	Weekly alcohol use	Sectional
52	1	Alcohol consumption in early adolescence: Associations with sociodemographic and psychosocial factors according to gender	Pedroni, C., Dujeu, M., Lebacq, T., Desnouck, V., Holmberg, E., Castetbon, K.	2021	Belgium	EU	4364	Family support; family structure; SES	Multidimensional Scale of Perceived Social Support; Household composition; FAS	IV	Alcohol consumption	Daily alcohol consumption	Sectional
56	1	Greenlandic family structure and communication with parents: influence on schoolchildren's drinking behaviour	del Carmen, M., Alcón, G., Pedersen, J. M., María, A., González, C.	2002	Greenland	EU	1648	SES; Family structure; communication with parents	parents' occupational level; Household composition; communication with parents	IV	Alcohol consumption	Alcohol consumption	Sectional
58	1	EXPERIENCE OF CZECH CHILDREN WITH ALCOHOL CONSUMPTION IN RELATION TO SELECTED FAMILY INDICATORS	Hodacova, L., Smejkalova, J., Cermakova, E., Kalman, M.	2017	Czech	EU	4293	Family structure; family activity; communication with parents	Household composition; time with family; communication with parents	IV	alcohol consumption; experience of drunkenness	alcohol consumption; experience of drunkenness	Sectional
67	1	Associations between family structure and adolescents' food habits	Fismen, A. S., Smith, O. R. F., Samdal, O., Helleve, A., Haug, E.	2020	Norway	EU	4475	Family structure; SES	household composition; siblings; FAS	IV	Food habits	vegetables/sweets/sugar-added soft drinks consumption	Sectional
68	1	Trends in adolescent eating behaviour: a multilevel cross-sectional study of 11-15 year olds in Scotland, 2002-2010	Levin, K. A., Kirby, J., Currie, C., Inchley, J.	2012	Scotland	EU	16368	SES; family structure	FAS; household composition	IV	Eating behaviour	fruit/vegetables/sweets/crisps/chips consumption	Sectional
69	1	The influence of family structure on breakfast habits among adolescents	Jorgensen, A., Pedersen, T. P., Meilstrup, C. R., Rasmussen, M.	2011	Denmark	EU	6269	Family structure; SES	Household composition; Parents' occupational social class	IV	Breakfast consumption	Breakfast consumption during weekdays	Sectional
79	1	Adolescent risk behaviours and mealtime routines: does family meal frequency alter the association between family structure and risk behaviour?	Levin, K. A., Kirby, J., Currie, C.	2012	Scotland	EU	4257	Family structure; family meals	Household composition; family mealtime	IV	Health risk behaviour	Substance use; sex	Sectional
97	1	The Effects of Family Structure on Consumption and Exercise Patterns for Adolescent Youth	Yelick, A.	2017	US	NA	7447	Family structure	household composition	IV	consumption pattern; exercise pattern	consumptions of breakfast/fruits/vegetables/soft drinks/fast food; physical exercise frequency; MVPA	Sectional
98	1	An investigation of the impact of family dynamics on obesity among African American adolescent girls	McDyess, Tina D.	2018	US	NA	806	SES; family structure; Parental promotion of autonomy; Parental emotional support	FAS; Household composition; perceived parental promotion of autonomy;Parental emotional support	IV	Obesity	BMI	Sectional
100	1	Gender-specific substance use patterns and associations with individual, family, peer, and school factors in 15-year-old Portuguese adolescents: A latent class regression analysis	Picoito, J., Santos, C., Loureiro, I., Aguiar, P., Nunes, C.	2019	Portugual	EU	1553	SES; family structure; communication with parents	FAS; household composition; communication with parents	IV	use of alcohol, tobacco; drunkenness	use of alcohol, tobacco; drunkenness	Sectional
106	1	The Associations between Family-Related Factors and Excessive Internet Use in Adolescents	Faltynkova, A., Blinka, L., Sevcikova, A., Husarova, D.	2020	Slovakia	EU	2547	SES; family structure; parental emotional support; Parental promotion of autonomy; Parental monitoring ; Family activity; communication with parents	Subjective family wealth; Household composition; Parental Bonding Instrument; Parental monitoring; Family activities; communication with parents	IV	Excessive Internet Use	Excessive Internet Use scale	Sectional
110	1	Family Structure and Adolescent Substance Use: An International Perspective	Hoffmann, J. P.	2017	multiple(N=37)	Global	193202	SES; family structure; communication with parents	FAS; Household composition; communication with parents	IV and mediator	substance use	cigarette/alcohol/cannabis use	Sectional
113	1	Socio-demographic variability in adolescent substance use: Mediation by parents and peers	Wang, J., Simons-Morton, B. G., Farhart, T., Luk, J. W.	2009	US	NA	8795	Family structure; SES; parental monitoring	household compositionl; FAS; parental monitoring	IV and mediator	Substance Use	Sdrinking alcohol; being drunk; smoking cigarettes	Sectional	Family structure; family affluence-IV; parental monitoring- mediator
115	1	Adolescent substance abuse, the importance of family, school and peers: data from the health behaviour in school children	Jovic-Vranes, A. S., Vranes, B., Marinkovic, J., Cucic, V.	2005	Serbia	EU	1540	Family structure; communication with parents	Household composition; communication with parents	IV	Substance Use	alcohol consumption; drug use;	Sectional
118	1	Clustering of health-related behaviours and its relationship with individual and contextual factors in Portuguese adolescents: results from a cross-sectional study	dos Santos, C. S., Picoito, J., Loureiro, I., Nunes, C.	2020	Portugual	EU	4036	SES; Family structure;Family communication	FAS; Household composition; communication with parents	IV	Health behaviours	physical activity; eating habit; substance use	Sectional
126	1	Adolescents' sleep quality in relation to peer, family and school factors: findings from the 2017/2018 HBSC study in Flanders	Delaruelle, K., Dierckens, M., Vandendriessche, A., Deforche, B., Poppe, L.	2021	Belgium Flanders	EU	8153	SES; Family structure; Family support	Parental eduation; subjective family wealth; Household composition; Family support;	IV	sleep quality	sleep quality scale	Sectional
130	1	Parent, school, and peer factors related to US adolescents' diet and exercise	Chung, S. J., Ersig, A. L., McCarthy, A. M.	2018	US	NA	5248	Family structure; communication with parents; parental monitoring	Household composition; communication with parents; parental monitoring	IV	Eating behaviour	breakfast and soft drink consumption	Sectional
133	1	Physical activity and features of the environment in which school children grow up as low mood determinants	Kleszczewska, D., Siedlecka, J., Mazur, J.	2019	Poland	EU	5195	SES; Family structure;Family support	FAS; Household composition; Family support	IV	general wellbeing;	WHO-5 wellbeing screen test	Sectional
140	1	The role of individual and macro-level social determinants on young adolescents' psychosomatic complaints	Ottova, V., Erhart, M., Vollebergh, W., Kökönyei, G., Morgan, A., Gobina, I., Jericek, H., Cavallo, F., Välimaa, R., de Matos, M. G., Gaspar, T., Schnohr, C. W., Ravens-Sieberer, U.	2012	multiple(N=34)	EU	98773	communication with parents; family structure; SES	communication with parents; household composition; FAS	IV	Psychosomatic complaints	HBSC symptom checklist	Sectional
142	1	What is worse? A hierarchy of family-related risk factors predicting alcohol use in adolescence	Kuntsche, E. N., Kuendig, H.	2006	Switzerland	EU	3127	Family Structure; Family drinking; Family communication; Family activity; Family support	household composition; Perception of excessive drinking in the family; Family communication; Family activity; Family support	IV	alcohol use	Frequency of alcoholic beverage intake; drunkenness	Sectional
152	1	Prevalence and familial predictors of suicidal behaviour among adolescents in Lithuania: a cross-sectional survey 2014	Zaborskis, A., Sirvyte, D., Zemaitiene, N.	2016	Lithuania	EU	2542	SES; Family structure; Family communication; Satisfaction with family relationships; Parental monitoring; Emotional support; School-related parental support; Parenting style; Family activity; Electronic media communication with parents; Seeing the parents	FAS; Household composition; Communication with Parents; Family Dynamics Measure; Satisfaction with family relationships; Parental monitoring; Parental bonding; parental disciplinary styles; Family activities; Electronic media communication with parents; Seeing the parents	IV	Suicide and self-harm	Youth Risk Behaviour Survey	Sectional
155	1	Subjective health complaints among boys and girls in the Swedish HBSC study: Focussing on parental foreign background	Carlerby, H., Viitasara, E., Knutsson, A., Gillander Gådin, K.	2011	Sweden	EU	11268	Immigrant Status; SES; Family Structure	Parental Immigrant Status; FAS; Household composition	IV	Subjective health complaints	HBSC Symptoms Checklist	Sectional
167	1	Breakfast consumption and its socio-demographic and lifestyle correlates in schoolchildren in 41 countries participating in the HBSC study	Vereecken, C., Dupuy, M., Rasmussen, M., Kelly, C., Nansel, T. R., Al Sabbah, H., Baldassari, D., Jordan, M. D., Maes, L., Niclasen, B. V. L., Ahluwalia, N., Mager, U., de Smet, P., Alexandrova, A., Janssen, I., Krch, F., Maser, M., Ojala, K., Niclassen, B., Németh, Á, Giacchi, M., Dalmasso, P., Rossi, S., Lazzeri, G., Pudule, I., Kololo, H., Craciun, C., Szentagotai, A., Baskova, M., Delgrande, …	2009	multiple(N=41)	EU+NA	204534	SES; Family Structure	FAS; Household composition	IV	Daily breakfast consumption	Daily breakfast consumption	Sectional
168	1	Irregular breakfast consumption in adolescence and the family environment: Underlying causes by family structure	Levin, K. A., Kirby, J.	2012	Scotland	EU	16406	Family structure; SES; Seeing parents; Perceived parenting; Communication with parents; Communication with siblings	Household composition; FAS; Contact with parents; Perceived parenting; Communication with parents; Communication with siblings	IV and moderator	Irregular breakfast consumption	Daily breakfast consumption	Sectional	Family structure was a moderator
169	1	Associations between family structure and young people's physical activity and screen time behaviors	Langoy, A., Smith, O. R. F., Wold, B., Samdal, O., Haug, E. M.	2019	Norway	EU	4475	Family structure; SES	Household composition; FAS	IV	Moderate to vigorous physical activity; Organized sport; Screen-based behaviors	Moderate to vigorous physical activity; Organized sport; Screen-based behaviors	Sectional
171	1	Family structure and children's living conditions. A comparative study of 24 countries	Låftman, S. B.	2010	multiple(N=24)	Global	90808	Family structure; communication with parents	Household composition; communication with parents	IV	Health complaints; self-rated health	HBSC Symptom Checklist; self-rated health	Sectional
181	1	Inequalities in toothbrushing among adolescents in Scotland 1998-2006	Levin, K. A., Currie, C.	2009	Scotland	EU	15460	Family structure; SES; parental monitoring	Household composition; FAS	IV	toothbrushing	toothbrushing	Sectional
182	1	Characterization of Resilient Adolescents in the Context of Parental Unemployment	Moreno-Maldonado, C., Jimenez-Iglesias, A., Rivera, F., Moreno, C.	2020	Spain	EU	908	SES; Family structure; Family support; Satisfaction with family relationships	Parental educational level; subjective family wealth; Household composition; Family support; Family satisfaction	IV	Global Health Score	life satisfaction; heath-related quality of life; self-reported health	Sectional
184	1	Adolescent toothbrushing and the home environment: sociodemographic factors, family relationships and mealtime routines and disorganisation	Levin, K. A., Currie, C.	2010	Scotland	EU	6190	Family structure; SES; Satisfaction with family relationships; Family meals	Household composition; number of siblings; have (not) the second home; FAS; Parental employment; Contact with parents; Perceived parenting; Comunication with parents/siblings; Family evening meal	IV	Tooth brushing	Tooth brushing	Sectional
185	1	Sexual behaviour in 15-year-old adolescents: Insights into the role of family, peer, teacher, and classmate support	Borraccino, A., Lo Moro, G., Dalmasso, P., Nardone, P., Donati, S., Berchialla, P., Charrier, L., Lenzi, M., Spinelli, A., Lemma, P.	2020	Italy	EU	18918	Family structure; family support	Household composition; Family support	IV	Early sexual intercourse	Sexual intercourse	Sectional
189	1	Is risk-taking behaviour more prevalent among adolescents with learning disabilities?	Palfiova, M., Dankulincova Veselska, Z., Bobakova, D., Holubcikova, J., Cermak, I., Madarasova Geckova, A., Van Dijk, J. P., Reijneveld, S. A.	2017	Slovakia	EU	1517	SES; Family structure	FAS; household composition	Mediator and moderator	Risk behaviours	Early sexual experience; Early smoking initiation; Drunkenness	Sectional
196	1	Gender and Age Differences in Social Inequality on Adolescent Life Satisfaction: A Comparative Analysis of Health Behaviour Data from 41 Countries	Zaborskis, A., Grincaite, M.	2018	multiple(N=41)	Global	192718	Family structure; SES	household composition; FAS	IV	Life satisfaction	Life satisfaction	Sectional
197	1	The interplay between national and parental unemployment in relation to adolescent life satisfaction in 27 countries: Analyses of repeated cross-sectional school surveys	Johansson, K., Petersen, S., Högberg, B., Stevens, G. W. J. M., De Clercq, B., Frasquilho, D., Elgar, F., Strandh, M.	2019	multiple(N=27)	Global	386402	SES; Family structure	Parental unemployment; household composition	IV and moderator	Life satisfaction	Life satisfaction	Sectional	family-level factor moderated country-level factor
200	1	Shared physical custody after family split-up: implications for health and well-being in Swedish schoolchildren	Carlsund, A., Eriksson, U., Sellstrom, E.	2013	Sweden	EU	10286	Family structure; communication with parents	Household composition; communication with parents	IV	subjective health complaints; subjective wellbeing	HBSC Symptom Checklist; Wellbeing scale	Sectional
201	1	Risk behaviour in Swedish adolescents: is shared physical custody after divorce a risk or a protective factor?	Carlsund, A., Eriksson, U., Lofstedt, P., Sellstrom, E.	2013	Sweden	EU	3699	SES; Immigrant status; Communication with parents; Family structure	Parental employment; subjective family wealth; Immigrant status; Communication with parents; Household composition	IV	Smoking; Drinking; Sexual debut; Conduct problems	Smoking; Drinking; Sexual debut; Strengths and Difficulties Questionnaire	Sectional
205	1	Social Inequality in Adolescent Life Satisfaction: Comparison of Measure Approaches and Correlation with Macro-level Indices in 41 Countries	Zaborskis, A., Grincaite, M., Lenzi, M., Tesler, R., Moreno-Maldonado, C., Mazur, J.	2019	multiple(N=41)	Global	192718	SES; family structure	FAS; Household composition	IV	Life satisfaction	Life satisfaction	Sectional
218	1	Associations between life contexts and early sexual initiation among young women in France	Jovic, Sonia, Delpierre, Cyrille, Ehlinger, Virginie, Sentenac, Mariane, Young, Honor, Arnaud, Catherine, Godeau, Emmanuelle	2014	France	EU	1094	Family structure; communication with parents; parental bonding; parental monitoring	Household compositionl;communication with parents; bonding; parental monitoring	IV	Early sexual initiation	Early sexual initiation	Sectional
221	1	Suicidal thoughts and depressive feelings amongst Estonian schoolchildren: effect of family relationship and family structure	Samm, A., Tooding, L. M., Sisask, M., Kolves, K., Aasvee, K., Varnik, A.	2010	Estonia	EU	4389	satisfaction with family relationships; communication with parents; family structures; SES	family satisfaction; communication with parents; household composition; family economic deprivation based on FAS	IV	suicidal ideation; depressive feelings	suicidal ideation; depressive feelings	Sectional
224	1	Weight concerns among adolescent boys	Kelly, C., Fitzgerald, A., Sentenac, M., Gakewski, J., Molcho, M., Nic Gabhainn, S.	2016	Ireland	EU	6187	Family meals; Communication with parents; SES; Family structure	Breakfast with family; Communication with parents; Maternal employment; household composition	IV	Weight concerns	Weight concerns	Sectional
225	1	Lunch frequency among adolescents: Associations with sociodemographic factors and school characteristics	Pedersen, T. P., Holstein, B. E., Krolner, R., Ersbøll, A. K., Jørgensen, T. S., Aarestrup, A. K., Utter, J., McNaughton, S. A., Neumark-Stzainer, D., Rasmussen, M.	2016	Denmark	EU	4429	SES; immigrant status; family structure	family occupational social class; immigrant status; household composition	IV	lunch frequency		Sectional
237	1	Socialization instances linked to cannabis experimentation among French teenagers	Jovic, S., Genolini, C., Delpierre, C., Spilka, S., Ehlinger, V., Ross, J., Arnaud, C., Godeau, E.	2014	France	EU	4175	SES; Family structure;Communication with parents; Parental monitoring	Parents’ occupational social class; FAS; Household composition; Communication with parents; Parental monitoring	IV	Cannabis Experimentation	cannabis consumption	Sectional
241		The Happiest Kids on Earth. Gender Equality and Adolescent Life Satisfaction in Europe and North America	de Looze, M. E., Huijts, T., Stevens, G. W. J. M., Torsheim, T., Vollebergh, W. A. M.	2018	multiple(N=34)	EU+NA	171528	SES; Family structure; Communication with parents	Rank of FAS; household composition; Communication with parents	IV	Life satisfaction	Life satisfaction	Sectional
242		Ethnic differences in youth well-being: The role of sociodemographic background and social support	Runarsdottir, E. M., Vilhjalmsson, R.	2015	Iceland	EU	11435	SES; Family structure; Communication with parents	FAS; Parental employment; Household composition; Communication with parents	IV	Life satisfaction; Subjective psychosomatic complaints	Life satisfaction; HBSC symptom Checklist	Sectional
244		Supportive communication with parents moderates the negative effects of electronic media use on life satisfaction during adolescence	Boniel-Nissim, M., Tabak, I., Mazur, J., Borraccino, A., Brooks, F., Gommans, R., van der Sluijs, W., Zsiros, E., Craig, W., Harel-Fisch, Y., Finne, E.	2015	multiple(N=9)	EU+NA	53973	SES; Family structure; Communication with parents	FAS; household composition; Communication with parents;	IV and moderator	Life satisfaction	Life satisfaction	Sectional	FAS, Family structure--IV; Communication with parents-- moderator
248		Sustaining a positive body image in adolescence: an assets-based analysis	Fenton, C., Brooks, F., Spencer, N. H., Morgan, A.	2010	England	EU	6425	SES; Family structure; Communication with parents	FAS; Household composition; Communication with parents	IV	Body image	Body image	Sectional
257		Socioeconomic disparities in diet vary according to migration status among adolescents in Belgium	Rouche, M., De Clercq, B., Lebacq, T., Dierckens, M., Moreau, N., Desbouys, L., Godin, I., Castetbon, K.	2019	Belgium	EU	19172	Immigrant status; SES; Family structure	Immigrant status; Family affluence; Parental employment; Household composition; Siblings	IV and moderator	Food Frequency	Food Frequency Scale	Sectional	Immigrant status -- moderator
260		Exploring Whether Talking With Parents, Siblings, and Friends Moderates the Association Between Peer Victimization and Adverse Psychosocial Outcomes	Hong, J. S., Zhang, S., Gonzalez-Prendes, A. A., Albdour, M.	2020	US	NA	12642	Family structure; SES; communication with parents; communication with siblings	household composition; subjective family wealth; communication with parents; communication with siblings	IV and moderator	alcohol/tobacco use; delinquent friend affiliation; internalizing problems	alcohol/tobacco use; delinquent friend affiliation; HBSC Symptom Checklist	Sectional
264		How parents can affect excessive spending of time on screen-based activities	Brindova, D., Pavelka, J., Ševčikova, A., Žežula, I., Van Dijk, J. P., Reijneveld, S. A., Geckova, A. M.	2014	multiple(N=2)	EU		Family structure; Screening-time-related parental rules; Family activitiy	Household composition; Parental restriction of screen related activities; Family activitiy	IV and moderator	Screen-based activities	Screen-based activities	Sectional
274		National Income and Income Inequality, Family Affluence and Life Satisfaction Among 13 year Old Boys and Girls: A Multilevel Study in 35 Countries	Levin, K. A., Torsheim, T., Vollebergh, W., Richter, M., Davies, C. A., Schnohr, C. W., Due, P., Currie, C.	2011	multiple(N=35)	Global	58364	family structure; SES	Household composition; Ridit transformations of FAS	IV	Life satisfaction	Life satisfaction	Sectional
275		Communication in single- and two-parent families and their influence on Portuguese and Spanish adolescents’ life satisfaction	Camacho, I., Jiménez-Iglesias, A., Rivera, F., Moreno, C., Gaspar de Matos, M.	2020	multiple(N=2)	EU	24070	Family structure; communication with parents	Household composition; communication with parents	IV and moderator	Life satisfaction	Life satisfaction	Sectional	Family structure was a moderator, communication was a IV
278		Income Inequality and Adolescent Gambling Severity: Findings from a Large-Scale Italian Representative Survey	Canale, N., Vieno, A., Lenzi, M., Griffiths, M. D., Borraccino, A., Lazzeri, G., Lemma, P., Scacchi, L., Santinello, M.	2017	Italy	EU	20791	Family structure; SES; Family support	household composition; FAS; Family support	IV	At-risk or problem gambling	South Oaks Gambling Screen-Revised for Adolescents	Sectional
279		Early adolescent sexual initiation as a problem behavior: A comparative study of five nations	Madkour, A. S., Farhat, T., Halpern, C. T., Godeau, E., Gabhainn, S. N.	2010	multiple(N=5)	EU+NA	5624	family structure; SES	Household composition; parental education; FAS	IV	sexual initiation	sexual initiation	Sectional
46	1	Social Determinants of Smoking, Alcohol and Drug Use Among Lithuanian School-Aged Children: Results From 5 Consecutive HBSC Surveys, 1994-2010	Sumskas, L., Zaborskis, A., Grabauskas, V.	2012	Lithuania	EU	26556	SES; Family structure	Subjective family wealth; Household composition	IV and moderator	Substance use	Tobacco/Alcohol/Cannabis use	Trend
61	1	Family structure and breakfast consumption of 11-15 year old boys and girls in Scotland, 1994-2010: a repeated cross-sectional study	Levin, K. A., Kirby, J., Currie, C.	2012	Scotland	EU	26626	Family structure	Household composition	IV and moderator	Breakfast consumption	Daily breakfast consumption	Trend
161	1	Mental well-being and subjective health of 11- to 15-year-old boys and girls in Scotland, 1994-2006	Levin, K. A., Currie, C., Muldoon, J.	2009	Scotland	EU	19393	Family structure; SES	Household composition; Family affluence	IV	Mental wellbeing	Happiness; Confidence; Helplessness; Feeling of Left out; Multiple Health Complaints	Trend
166	1	Trends from 2002 to 2010 in Daily Breakfast Consumption and its Socio-Demographic Correlates in Adolescents across 31 Countries Participating in the HBSC Study	Lazzeri, G., Ahluwalia, N., Niclasen, B., Pammolli, A., Vereecken, C., Rasmussen, M., Pedersen, T. P., Kelly, C.	2016	multiple(N=31)	EU+NA	455391	SES; Family Structure	FAS; Household composition	IV	Daily breakfast consumption	Daily breakfast consumption	Trend
