# Supplementary material for: Family Related Variables’ Influences on Adolescents’ Health Based on Health Behaviour in School-Aged Children Database, an AI-Assisted Scoping Review, and Narrative Synthesis
Source: Front Psychol. 2022 Aug 10;13:871795. doi: 10.3389/fpsyg.2022.871795 (PMC9400839; doi:10.3389/fpsyg.2022.871795)
Supplement: Supplementary file 6 [file Table_5.XLSX]

## Sheet: Sheet1
Parental Education
New ID	Decision	Title	Authors	Publication Year	Country	Area	Sample size	Family Variable	Measurement for family	Family role (IV/Mediator/Moderator)	Children's health outcomes	Measurements for children	Design (Sectional/Trend)	Note
81	1	Lack of parental rule-setting on eating is associated with a wide range of adolescent unhealthy eating behaviour both for boys and girls	Holubcikova, J., Kolarcik, P., Madarasova Geckova, A., Van Dijk, J. P., Reijneveld, S. A.	2016	Slovakia	EU	2765	Eating-related parental rules; SES	Eating-related parental rules; subjective family wealth; Parents' education	IV	Eating Habits	Breakfast habit; Fruit/vegetables/sweets/Soft drinks/energy drinks consumption;	Sectional
188	1	Self-Reported Oral Health Related Behaviour and Gum Bleeding of Adolescents in Slovakia in Relation to Socioeconomic Status of Their Parents: Cross-Sectional Study Based on Representative Data Collection	Timkova, S., Kolarcik, P., Geckova, A. M.	2019	Slovakia	EU	5074	SES	Family affluence; parental educational level; parental employment	IV	oral health promoting behaviour; oral health	Dental hygiene; Toothbrush changing; Preventive dental check-up; Gum bleeding	Sectional
120	1	Adolescents, family status, education and health: New insights into health behaviour in school-aged children in Portugal	Gaspar de Matos, Margarida, Borges, Antonio, Capucha, Luis	2011	Portugual	EU	4877	SES	FAS; Parental eduational level	IV	Health-related quality of life; Life satisfaction	KIDSCREEN-10; Life satisfaction scale	Sectional
279		Early adolescent sexual initiation as a problem behavior: A comparative study of five nations	Madkour, A. S., Farhat, T., Halpern, C. T., Godeau, E., Gabhainn, S. N.	2010	multiple(N=5)	EU+NA	5624	family structure; SES	Household compostion; parental education; FAS	IV	sexual initiation	sexual initiation	Sectional
126	1	Adolescents' sleep quality in relation to peer, family and school factors: findings from the 2017/2018 HBSC study in Flanders	Delaruelle, K., Dierckens, M., Vandendriessche, A., Deforche, B., Poppe, L.	2021	Belgium Flanders	EU	8153	SES; Family structure; Family support	Parental eduation; subjective family wealth; Household composition; Family support;	IV	sleep quality	sleep quality scale	Sectional
28	1	Overweight among students aged 11-15 years and its relationship with breakfast, area of residence and parents' education: results from the Italian HBSC 2010 cross-sectional study	Lazzeri, G., Giacchi, M. V., Spinelli, A., Pammolli, A., Dalmasso, P., Nardone, P., Lamberti, A., Cavallo, F.	2014	Italy	EU	58000	SES	Parental educational level	IV	Overweight	Cole’s classification based on BMI	Sectional
134	1	Parental educational level and psychological positive health and health complaints in Spanish children and adolescents	Padilla-Moledo, C., Ruiz, J. R., Castro-Piñero, J.	2016	Spain	EU	685	SES	Parental educational level	IV	Psychological positive health; Health complaints	Perceived health status; Life satisfaction; HBSC symptom Checklist	Sectional
84	1	How family socioeconomic status, peer behaviors, and school-based intervention on healthy habits influence adolescent eating behaviors	Moreno-Maldonado, C., Ramos, P., Moreno, C., Rivera, F.	2018	Spain	EU	6851	SES	Parental educational level; Parental employment; FAS	IV	Eating Habits	Breakfast/fruit/sweets/Soft drinks consumption	Sectional
93	1	Contributing factors in adolescents’ mental well-being—the role of socioeconomic status, social support, and health behavior	Nagy-Pénzes, G., Vincze, F., Bíró, É	2020	Hungary	EU	253	SES	Parental educational level; subjective family wealth; FAS	IV	Life Satisfaction; Depression; Psychosomatic Symptoms	Life Satisfaction; Child Depression Inventory; HBSC Symptom Checklist	Sectional
182	1	Characterization of Resilient Adolescents in the Context of Parental Unemployment	Moreno-Maldonado, C., Jimenez-Iglesias, A., Rivera, F., Moreno, C.	2020	Spain	EU	908	SES; Family structure; Family support; Satisfaction with family relationships	Parental educational level; subjective family wealth; Household composition; Family support; Family satisfaction	IV	Global Health Score	life satisfaction; heath-related quality of life; self-reported health	Sectional
107	1	Does Life Satisfaction Mediate the Association between Socioeconomic Status and Excessive Internet Use?	Urbanova, L. B., Holubcikova, J., Geckova, A. M., Reijneveld, S. A., van Dijk, J. P.	2019	Slovakia	EU	2844	SES	subjective family wealth; parental highest education; parental (un)employment	IV	Excessive Internet Use	Excessive Internet Use scale	Sectional
Personal Education
New ID	Decision	Title	Authors	Publication Year	Country	Area	Sample size	Family Variable	Measurement for family	Family role (IV/Mediator/Moderator)	Children's health outcomes	Measurements for children	Design (Sectional/Trend)
49	1	Socioeconomic differences in the use of alcohol and drunkenness in adolescents: Trends in the Health Behaviour in School-aged Children study in Finland 1990–2014	Liu, Y., Lintonen, T., Tynjälä, J., Villberg, J., Välimaa, R., Ojala, K., Kannas, L.	2018	Finland	EU	11126	SES	Educational aspiration; Subjective family wealth	IV and moderator	Alcohol use; Drunkenness	Alcohol use frequency; Drunkenness	Trend
50	1	Trends in socioeconomic inequalities in adolescent alcohol use in Germany between 1994 and 2006	Richter, M., Kuntsche, E., De Looze, M., Pförtner, T. K.	2013	Germany	EU	5074	SES	FAS; Educational track	IV and moderator	Weekly alcohol use	Weekly alcohol use	Trend
91	1	Adolescent Socioeconomic Status and Mental Health Inequalities in the Netherlands, 2001-2017	Weinberg, D., Stevens, Gwjm, Duinhof, E. L., Finkenauer, C.	2019	Netherlands	EU	27020	SES	FAS; subjective family wealth; personal education level	IV and moderator	Mental Health Problems	Strengths and Difficulties Questionnaire; life satisfaction	Trend
146	1	The influence of parental occupation and the pupils' educational level on lifestyle behaviors among adolescents in Belgium	Vereecken, C. A., Maes, L., De Bacquer, D.	2004	Belgium Flanders	EU	7613	SES	Parental occupational status; children's educational level	IV and moderator	Health lifestyle	food habits; substance use; physical inactivity; dental care	Sectional
