# Supplementary material for: Family Related Variables’ Influences on Adolescents’ Health Based on Health Behaviour in School-Aged Children Database, an AI-Assisted Scoping Review, and Narrative Synthesis
Source: Front Psychol. 2022 Aug 10;13:871795. doi: 10.3389/fpsyg.2022.871795 (PMC9400839; doi:10.3389/fpsyg.2022.871795)
Supplement: Supplementary file 7 [file Table_6.XLSX]

## Sheet: Sheet1
Synthesis of articles adopting FAS to measure SES
New ID	Decision	Title	Authors	Publication Year	Country	Area	Sample size	Family Variable	Measurement for family	Family role (IV/Mediator/Moderator)	Children's health outcomes	Measurements for children	Design (Sectional/Trend)	Note
124	1	Social capital and adolescent smoking in schools and communities: A cross-classified multilevel analysis	De Clercq, B., Pfoertner, T. K., Elgar, F. J., Hublet, A., Maes, L.	2014	Belgium Flanders	EU	8453	Parental smoking; SES; School-related parental support	Parental smoking; FAS; School-related support	IV	Smoking	Smoking frequency	Sectional
224	1	Weight concerns among adolescent boys	Kelly, C., Fitzgerald, A., Sentenac, M., Gakewski, J., Molcho, M., Nic Gabhainn, S.	2016	Ireland	EU	6187	Family meals; Communication with parents; SES; Family structure	Breakfast with family; Communication with parents; Maternal employment; Family structure	IV	Weight concerns	Weight concerns	Sectional
140	1	The role of individual and macro-level social determinants on young adolescents' psychosomatic complaints	Ottova, V., Erhart, M., Vollebergh, W., Kökönyei, G., Morgan, A., Gobina, I., Jericek, H., Cavallo, F., Välimaa, R., de Matos, M. G., Gaspar, T., Schnohr, C. W., Ravens-Sieberer, U.	2012	multiple(N=34)	EU	98773	communication with parents; family structure; SES	communication with parents; family structure; FAS	IV	Psychosomatic complaints	HBSC symptom checklist	Sectional
221	1	Suicidal thoughts and depressive feelings amongst Estonian schoolchildren: effect of family relationship and family structure	Samm, A., Tooding, L. M., Sisask, M., Kolves, K., Aasvee, K., Varnik, A.	2010	Estonia	EU	4389	satisfaction with family relationships; communication with parents; family structures; SES	family satisfaction; communication with parents; household composition; family economic deprivation based on FAS	IV	suicidal ideation; depressive feelings	suicidal ideation; depressive feelings	Sectional
278		Income Inequality and Adolescent Gambling Severity: Findings from a Large-Scale Italian Representative Survey	Canale, N., Vieno, A., Lenzi, M., Griffiths, M. D., Borraccino, A., Lazzeri, G., Lemma, P., Scacchi, L., Santinello, M.	2017	Italy	EU	20791	Family structure; SES; Family support	Family structure; FAS; Family support	IV	At-risk or problem gambling	South Oaks Gambling Screen-Revised for Adolescents	Sectional
6	1	Trends in adolescent overweight prevalence in Italy according to socioeconomic position	Lazzeri, G., Dalmasso, P., Berchialla, P., Borraccino, A., Charrier, L., Giacchi, M. V., Simi, R., Lenzi, M., Vieno, A., Lemma, P., Cavallo, F.	2017	Italy	EU	15035	SES	FAS	IV	Overweight	BMI	Trend
22	1	Socioeconomic differences in emotional symptoms among adolescents in the Nordic countries: Recommendations on how to present inequality	Nielsen, L., Damsgaard, M. T., Meilstrup, C., Due, P., Madsen, K. R., Koushede, V., Holstein, B. E.	2015	multiple (N=5)	EU	29642	SES	FAS	IV	Emotional symptoms	HBSC Symptom Check List	Sectional
25	1	Time-trends and correlates of obesity in Czech adolescents in relation to family socioeconomic status over a 16-year study period (2002-2018)	Sigmund, E., Sigmundova, D., Badura, P., Voracova, J., Vladimir, H., Hollein, T., Pavelka, J., Puzova, Z., Kalman, M.	2020	Czech	EU	29879	SES	FAS	moderator	Obesity	BMI	Trend
26	1	Trends and correlates of overweight/obesity in Czech adolescents in relation to family socioeconomic status over a 12-year study period (2002-2014)	Sigmund, E., Badura, P., Sigmundová, D., Voráčová, J., Zacpal, J., Kalman, M., Pavelka, J., Vokacová, J., Hobza, V., Hamrik, Z.	2018	Czech	EU	18250	SES	FAS	moderator	Body weight status	BMI	Trend
33	1	Socio-demographic and lifestyle factors associated with overweight in a representative sample of 11-15 year olds in France: Results from the WHO-Collaborative Health Behaviour in School-aged Children (HBSC) cross-sectional study	Dupuy, M., Godeau, E., Vignes, C., Ahluwalia, N.	2011	France	EU	6604	SES	FAS	IV	Overweight	BMI	Sectional
36	1	Socioeconomic differences in adolescents' smoking: A comparison between Finland and Beijing, China	Liu, Y., Wang, M., Tynjälä, J., Villberg, J., Lv, Y., Kannas, L.	2016	Finland	EU	1685	SES	FAS	IV	Tobacco smoking	Ever smoked; Weekly smoker; Early onset of smoking	Sectional
38	1	The role of socioeconomic status, peer and school context for adolescent smoking	Richter, M., Lampert, T.	2008	Germany	EU	5650	SES	FAS	IV	Tobacco smoking	Weekly smoking	Sectional
40	1	Trends in socio-economic differences in tobacco smoking among German schoolchildren, 1994-2002	Richter, M., Leppin, A.	2007	Germany	EU	11401	SES	FAS	IV and moderator	Tobacco smoking	Weekly smoking	Trend
41	1	Socioeconomic inequalities in the impact of tobacco control policies on adolescent smoking. A multilevel study in 29 European countries	Pförtner, T. K., Hublet, A., Schnohr, C. W., Rathmann, K., Moor, I., de Looze, M., Baška, T., Molcho, M., Kannas, L., Kunst, A. E., Richter, M.	2016	multiple (N=29)	EU	50338	SES	FAS	IV and moderator	Smoking behaviour	Weekly smoking	Sectional
44	1	The role of behavioural factors in explaining socio-economic differences in adolescent health: A multilevel study in 33 countries	Richter, M., Erhart, M., Vereecken, C. A., Zambon, A., Boyce, W., Gabhainn, S. N.	2009	multiple(N=33)	Global	97721	SES	FAS	IV	Self-rated health; Health behaviours	Self-rated health; Substance use; Physical activities; Nutrition	Sectional
45	1	The association between family affluence and smoking among 15-year-old adolescents in 33 European countries, Israel and Canada: the role of national wealth	Pfortner, T. K., Moor, I., Rathmann, K., Hublet, A., Molcho, M., Kunst, A. E., Richter, M.	2015	multiple(N=33)	Global	60490	SES	FAS	IV and moderator	Tobacco smoking	Weekly smoking; Early smoking; weekly smoking among former experimenters	Sectional
48	1	School-related mediators in social inequalities in smoking: a comparative cross-sectional study of 20,399 adolescents	Schnohr, C. W., Kreiner, S., Rasmussen, M., Due, P., Diderichsen, F.	2009	multiple(N=32)	Global	20339	SES	FAS	IV	Smoking behaviour	Daily smoking	Sectional
54	1	Socio-economic inequality in multiple health complaints among adolescents: international comparative study in 37 countries	Holstein, B. E., Currie, C., Boyce, W., Damsgaard, M. T., Gobina, I., Kokonyei, G., Hetland, J., de Looze, M., Richter, M., Due, P., Grp, Hbsc Social Inequalities Focus	2009	multiple(N=37)	Global	204573	SES	FAS	IV	Subjective health complaints	HBSC Symptom Check List	Sectional
55	1	Family Affluence and the Eating Habits of 11-to 15-Year-Old Czech Adolescents: HBSC 2002 and 2014	Voracova, J., Sigmund, E., Sigmundova, D., Kalman, M.	2016	Czech	EU	10831	SES	FAS	IV and moderator	Eating Habits	fruit/vegetables/sweetened soft drinks/sweets consumption	Trend
57	1	Vigorous physical activity in relation to family affluence: time trends in Europe and North America	Sigmundová, D., Sigmund, E., Tesler, R., Ng, K. W., Hamrik, Z., Mathisen, F. K. S., Inchley, J., Bucksch, J.	2019	multiple(N=34)	EU+NA	501647	SES	FAS	IV and moderator	Vigorous physical activity	Vigorous physical activity	Trend
71	1	Inequalities in Croatian pupils' unhealthy behaviours and health outcomes: role of school, peers and family affluence	Simetin, I. P., Kuzman, M., Franelic, I. P., Pristas, I., Benjak, T., Dezeljin, J. D.	2011	Crotia	EU	3296	SES	FAS	IV	Unhealthy behaviours; health outcomes	smoking; drunkenness; physical inactivity; irregular breakfast; soft drink consumption; self-rated health; health complaints; life satisfaction	Sectional
86	1	Diet-Related Behaviors and Diet Quality among School-Aged Adolescents Living in Greece	Benetou, V., Kanellopoulou, A., Kanavou, E., Fotiou, A., Stavrou, M., Richardson, C., Orfanos, P., Kokkevi, A.	2020	Greece	EU	3525	SES	FAS	IV	Diet Quality Score	consumptions of fruits, vegetables/salads, sweets (including chocolates and candies), sugar-sweetened beverages, coffee, and energy drinks	Sectional
73	1	Factors associated with unhealthy behaviours and health outcomes: a cross-sectional study among tuscan adolescents (Italy)	Lazzeri, G., Azzolini, E., Pammolli, A., Simi, R., Meoni, V., Giacchi, M. V.	2014	Italy	EU	3291	SES	FAS	IV	unhealthy behaviour; health outcomes	smoking; alcohol consumption; physical inactivity; sedentary lifestyle; irregular breakfast consumption; subjective health complaints; self-reported health; life satisfaction	Sectional
87	1	School- and Family-Level Socioeconomic Status and Health Behaviors: Multilevel Analysis of a National Survey in Wales, United Kingdom	Moore, G. F., Littlecott, H. J.	2015	Wales	EU	9194	SES	FAS	IV and moderator	Health behaviors	smoking; alcohol consumption; fruit and vegetable consumption; physical activity	Sectional
90	1	Changing trends in young people’s food behaviour and wellbeing in England in relation to family affluence between 2005 and 2014	Simon, A., Owen, C., O’Connell, R., Brooks, F.	2018	England	EU	12140	SES	FAS	IV and moderator	food behaviours	consumptions of breakfast/fruits/ vegetables/soft drinks; self-rate health; quality of life	Trend
119	1	Do societal wealth, family affluence and gender account for trends in adolescent cannabis use? A 30 country cross-national study	ter Bogt, T. F. M., de Looze, M., Molcho, M., Godeau, E., Hublet, A., Kokkevi, A., Kuntsche, E., Gabhainn, S. N., Franelic, I. P., Simons-Morton, B., Sznitman, S., Vieno, A., Vollebergh, W., Pickett, W.	2014	multiple(N=30)	EU+NA	160606	SES	FAS	IV and moderator	Cannabis use	Cannabis use	Trend
136	1	Adolescent Risk Taking, Neighborhood Social Capital, and Health	Boyce, W. F., Davies, D., Gallupe, O., Shelley, D.	2008	Canada	NA	2288	SES	FAS	IV and moderator	Self-rated health	Self-rated health	Sectional	SES moderated the relationship between health risk behaviours and self-rated health
151	1	Problematic Social Media Use and Health among Adolescents	Paakkari, L., Tynjala, J., Lahti, H., Ojala, K., Lyyra, N.	2021	Finland	EU	3408	SES	FAS	IV	Problematic social media use	Social Media Disorder Scale	Sectional
164	1	Socioeconomic inequalities in adolescent health 2002-2010: A time-series analysis of 34 countries participating in the Health Behaviour in School-aged Children study	Elgar, F. J., Pförtner, T. K., Moor, I., De Clercq, B., Stevens, G. W. J. M., Currie, C.	2015	multiple(N=34)	EU+NA	492788	SES	FAS	IV and moderator	Physical activity; BMI; Psychological symptoms; Physical symptoms; Life satisfaction	Physical activity; BMI; HBSC Symptom Checklist; Life satisfaction	Trend
175	1	School composition, school culture and socioeconomic inequalities in young people's health: Multi-level analysis of the Health Behaviour in School-aged Children (HBSC) survey in Wales	Moore, G. F., Littlecott, H. J., Evans, R., Murphy, S., Hewitt, G., Fletcher, A.	2017	Wales	EU	9055	SES	FAS	IV and moderator	Health behaviours	physical activity; fruit and vegetable consumption; tobacco/ alcohol/cannabis use	Sectional	Family SES moderated school-level SES
176	1	Psychosomatic symptoms among schoolchildren	Kelly, C., Molcho, M., Doyle, P., Gabhainn, S. N.	2010	Ireland	EU	9969	SES	FAS	IV	Psychosomatic symptom	HBSC symptom Checklist	Sectional
191	1	Revisiting Factors Associated With Screen Time Media Use: A Structural Study Among School-Aged Adolescents	Ngantcha, M., Janssen, E., Godeau, E., Ehlinger, V., Le-Nezet, O., Beck, F., Spilka, S.	2018	France	EU	10434	SES	FAS	IV	Screening time	Screening time	Sectional
193	1	Socioeconomic Effects on Meeting Physical Activity Guidelines: Comparisons among 32 Countries	Borraccino, A., Lemma, P., Iannotti, R. J., Zambon, A., Dalmasso, P., Lazzeri, G., Giacchi, M., Cavallo, F.	2009	multiple(N=32)	Global	160976	SES	FAS	IV	Physical activity; Sedentary behaviors	Physical activity; Sedentary behaviors	Sectional
229	1	International trends in 'bottom-end' inequality in adolescent physical activity and nutrition: HBSC study 2002-2014	Chzhen, Y., Moor, I., Pickett, W., Toczydlowska, E., Stevens, G. W. J. M.	2018	multiple(N=34)	Global	185355	SES	FAS	IV	physical activity; healthy diet; unhealthy diet; ‘bottom-end’ health	MVPA; healthy eating indexl; mean in the lower half of the distribution of MVPA/diet	Trend
235	1	Socio-Economic Inequalities in Adolescent Summer Holiday Experiences, and Mental Wellbeing on Return to School: Analysis of the School Health Research Network/Health Behaviour in School-Aged Children Survey in Wales	Morgan, K., Melendez-Torres, G. J., Bond, A., Hawkins, J., Hewitt, G., Murphy, S., Moore, G.	2019	Wales	EU	101910	SES	FAS	IV	Mental wellbeing	Short Warwick-Edinburgh Mental Wellbeing Scale ; Internalising Symptoms	Sectional
251		Medically Attended Injuries among Slovak Adolescents: Relationships with Socio-Economic Factors, Physical Fighting, and Physical Activity	Bakalar, P., Rosicova, K.	2020	Slovakia	EU	7928	SES	FAS	IV	Medically Attended Injuries	Medically Attended Injuries	Sectional
261		Greenlandic schoolchildren's compliance with national dietary guidelines	Niclasen, B., Schnohr, C. W.	2010	Greenland	EU	2462	SES	FAS	IV	Diet habbit	National Diet Guidelines	Sectional
262		How Are Adolescents Sleeping? Adolescent Sleep Patterns and Sociodemographic Differences in 24 European and North American Countries	Gariepy, G., Danna, S., Gobiņa, I., Rasmussen, M., Gaspar de Matos, M., Tynjälä, J., Janssen, I., Kalman, M., Villeruša, A., Husarova, D., Brooks, F., Elgar, F. J., Klavina-Makrecka, S., Šmigelskas, K., Gaspar, T., Schnohr, C.	2020	multiple(N=24)	EU+NA	165793	SES	FAS	IV	Sleep patterns	Sleep patterns	Sectional
267		Subjective health literacy among school-aged children	Paakkari, O., Torppa, M., Villberg, J., Kannas, L., Paakkari, L.	2018	Finland	EU	3732	SES	FAS	IV	Health Literacy	Health Literacy Scale	Sectional
269		Demographic and social inequalities in need for orthodontic treatment among schoolchildren in Lithuania	Kavaliauskiene, A., Sidlauskas, A., Zaborskis, A.	2010	Lithuania	EU	5632	SES	FAS	IV	Orthodontic complaints; Use of orthodontic appliances	Orthodontic complaints; Use of orthodontic appliances	Sectional
280		The influence of individual and regional factors on association between leisure time physical activity and psychological complaints among adolescents in europe	Petronyte, G., Zaborskis, A.	2009	multiple(N=20)	EU	106319	SES	FAS	IV	subjective psychological complaints	HBSC Symptom Checklist	Sectional
282		Regular energy drink consumption is associated with the risk of health and behavioural problems in adolescents	Holubcikova, J., Kolarcik, P., Madarasova Geckova, A., Reijneveld, S. A., van Dijk, J. P.	2017	Slovakia	EU	8977	SES	FAS	IV	energy drink consumption	energy drink consumption	Sectional
177	1	Influence on self-rated health of socio-demographic, lifestyle and affluence factors: an analysis of the Irish and International Health Behaviours Among School-Aged Children (HBSC) datasets 1998	Kelleher, C. C., Tay, J., Gabhainn, S. N.	2007	Ireland and Global(N=15)	Ireland and Global	115327	SES; Communication with parents	FAS; Communication with parents	IV	self rated health	self rated health	Sectional
62	1	Psychosocial and behavioural factors in the explanation of socioeconomic inequalities in adolescent health: a multilevel analysis in 28 European and North American countries	Moor, I., Rathmann, K., Stronks, K., Levin, K., Spallek, J., Richter, M.	2014	multiple(N=28)	EU+NA	117460	SES; communication with parents	FAS; communication with parents	IV	Self-rated health	Self-rated health	Sectional
82	1	Socio-economic position and adolescents' health in Italy: the role of the quality of social relations	Zambon, A., Lemma, P., Borraccino, A., Dalmasso, P., Cavallo, F.	2006	Italy	EU	4386	SES; Communication with parents	FAS; communication with parents	IV	health behaviours	smoking; alcohol use; frequency of physical activity; cannabis use.	Sectional
37	1	Socioeconomic inequalities in adolescent smoking across 35 countries: A multilevel analysis of the role of family, school and peers	Moor, I., Rathmann, K., Lenzi, M., Pförtner, T. K., Nagelhout, G. E., De Looze, M., Bendtsen, P., Willemsen, M., Kannas, L., Kunst, A. E., Richter, M.	2015	multiple(N=35)	Global	52907	SES; Communication with parents; Family structure	FAS; Communication with parents; Household composition	IV	Tobacco smoking	Weekly smoking	Sectional
102	1	Individual and environmental predictors of health risk behaviours among Dutch adolescents: The HBSC study	Harakeh, Z., De Looze, M. E., Schrijvers, C. T. M., van Dorsselaer, S. A. F. M., Vollebergh, W. A. M.	2012	Netherlands	EU	1742	SES; communication with parents; parental monitoring; alcohol drinking-related parental rules	FAS; communication with parents; mother's monitoring; Parental rules on alcohol drinking	IV	Health risk behaviour	Tobacco smoking; binge drinking; cannabis smoking; early sexual intercours	Sectional
3	1	Parental, peer and school experiences as predictors of alcohol drinking among first and second generation immigrant adolescents in Israel	Walsh, S. D., Djalovski, A., Boniel-Nissim, M., Harel-Fisch, Y.	2014	Israel	ME	3059	SES; Communication with parents; Parental monitoring	FAS; Communication with parents; Parental monitoring	IV	Alcohol drinking	Casual drinking; Drunkenness; Binge drinking	Sectional
245		Food-related family lifestyle associated with fruit and vegetable consumption among young adolescents in Belgium Flanders and the Veneto Region of Italy	Verzeletti, C., Maes, L., Santinello, M., Baldassari, D., Vereecken, C. A.	2010	multiple(N=2)	EU	14407	SES;family meals; eating-related parental rules	FAS; Dinner with family; Family rules of eating	IV	Fruit/vegetable consumption	Fruit/vegetable consumption	Sectional
50	1	Trends in socioeconomic inequalities in adolescent alcohol use in Germany between 1994 and 2006	Richter, M., Kuntsche, E., De Looze, M., Pförtner, T. K.	2013	Germany	EU	5074	SES	FAS; Educational track	IV and moderator	Weekly alcohol use	Weekly alcohol use	Trend
122	1	Social capital does matter for adolescent health: evidence from the English HBSC study	Morgan, A., Haglund, B. J. A.	2009	England	EU	6425	SES; Family activity; Parental emotional support; Parental promotion of autonomy	FAS; Family activities; Parental control	IV	Self-reported health; physical activity; smoking; drinking	Self-reported health; physical activity; smoking; drinking	Sectional
226	1	Social and behavioral predictors of adolescents’ positive attitude towards life and self	Malinowska-Cieślik, M., Mazur, J., Nałęcz, H., Małkowska-Szkutnik, A.	2019	Poland	EU	2939	SES; family communication	FAS; Family Dynamics Measure II	IV	Positive Attitude	Positive Attitude Scale	Sectional
244		Supportive communication with parents moderates the negative effects of electronic media use on life satisfaction during adolescence	Boniel-Nissim, M., Tabak, I., Mazur, J., Borraccino, A., Brooks, F., Gommans, R., van der Sluijs, W., Zsiros, E., Craig, W., Harel-Fisch, Y., Finne, E.	2015	multiple(N=9)	EU+NA	53973	SES; Family structure; Communication with parents	FAS; Family structure; Communication with parents;	IV and moderator	Life satisfaction	Life satisfaction	Sectional	FAS, Family structure--IV; Communication with parents-- moderator
77	1	Connectedness as a protective factor in immigrant youth: results from the Health Behaviours in School-aged Children (HBSC) Italian study	Borraccino, A., Berchialla, P., Dalmasso, P., Sciannameo, V., Vieno, A., Lazzeri, G., Charrier, L., Lemma, P.	2020	Italy	EU	47399	SES; Family support	FAS; Family support	IV	Life satisfaction; Health complaints;	Life satisfaction; HBSC Symptom Checklist	Sectional
68	1	Trends in adolescent eating behaviour: a multilevel cross-sectional study of 11-15 year olds in Scotland, 2002-2010	Levin, K. A., Kirby, J., Currie, C., Inchley, J.	2012	Scotland	EU	16368	SES; family structure	FAS; household composition	IV	Eating behaviour	fruit/vegetables/sweets/crisps/chips consumption	Sectional
189	1	Is risk-taking behaviour more prevalent among adolescents with learning disabilities?	Palfiova, M., Dankulincova Veselska, Z., Bobakova, D., Holubcikova, J., Cermak, I., Madarasova Geckova, A., Van Dijk, J. P., Reijneveld, S. A.	2017	Slovakia	EU	1517	SES; Family structure	FAS; household composition	Mediator and moderator	Risk behaviours	Early sexual experience; Early smoking initiation; Drunkenness	Sectional
205	1	Social Inequality in Adolescent Life Satisfaction: Comparison of Measure Approaches and Correlation with Macro-level Indices in 41 Countries	Zaborskis, A., Grincaite, M., Lenzi, M., Tesler, R., Moreno-Maldonado, C., Mazur, J.	2019	multiple(N=41)	Global	192718	SES; family structure	FAS; Household composition	IV	Life satisfaction	Life satisfaction	Sectional
110	1	Family Structure and Adolescent Substance Use: An International Perspective	Hoffmann, J. P.	2017	multiple(N=37)	Global	193202	SES; family structure; communication with parents	FAS; Household composition; communication with parents	IV and mediator	substance use	cigarette/alcohol/cannabis use	Sectional
118	1	Clustering of health-related behaviours and its relationship with individual and contextual factors in Portuguese adolescents: results from a cross-sectional study	dos Santos, C. S., Picoito, J., Loureiro, I., Nunes, C.	2020	Portugual	EU	4036	SES; Family structure;Family communication	FAS; Household composition; communication with parents	IV	Health behaviours	physical activity; eating habit; substance use	Sectional
248		Sustaining a positive body image in adolescence: an assets-based analysis	Fenton, C., Brooks, F., Spencer, N. H., Morgan, A.	2010	England	EU	6425	SES; Family structure; Communication with parents	FAS; Household composition; Communication with parents	IV	Body image	Body image	Sectional
152	1	Prevalence and familial predictors of suicidal behaviour among adolescents in Lithuania: a cross-sectional survey 2014	Zaborskis, A., Sirvyte, D., Zemaitiene, N.	2016	Lithuania	EU	2542	SES; Family structure; Family communication; Satisfaction with family relationships; Parental monitoring; Emotional support; School-related parental support; Parenting style; Family activity; Electronic media communication with parents; Seeing the parents	FAS; Household composition; Communication with Parents; Family Dynamics Measure; Satisfaction with family relationships; Parental monitoring; Parental bonding; parental disciplinary styles; Family activities; Electronic media communication with parents; Seeing the parents	IV	Suicide and self-harm	Youth Risk Behaviour Survey	Sectional
34	1	Familial determinants of current smoking among adolescents of Lithuania: a cross-sectional survey 2014	Zaborskis, A., Sirvyte, D.	2015	Lithuania	EU	3696	SES; Family structure; Communication with parents; Family communication; Satisfaction with family relationships; Parental monitoring; Parental emotional support; Parental promotion of autonomy; Family time together; School-related parental support; Parenting style; Electronic media communication with parents; Seeing of parents	FAS; Household composition; Communication with parents;Short Version of Family Dynamics Measure II; Satisfaction with family relationships; Parental monitoring; Parental bonding (two-dimension); Joint family activity; School-related parental support; Parental disciplinary styles measurement; Electronic media communication with parents; Seeing of parents	IV	Smoking behaviour	Smoking behaviour	Sectional
133	1	Physical activity and features of the environment in which school children grow up as low mood determinants	Kleszczewska, D., Siedlecka, J., Mazur, J.	2019	Poland	EU	5195	SES; Family structure;Family support	FAS; Household composition; Family support	IV	general wellbeing;	WHO-5 wellbeing screen test	Sectional
166	1	Trends from 2002 to 2010 in Daily Breakfast Consumption and its Socio-Demographic Correlates in Adolescents across 31 Countries Participating in the HBSC Study	Lazzeri, G., Ahluwalia, N., Niclasen, B., Pammolli, A., Vereecken, C., Rasmussen, M., Pedersen, T. P., Kelly, C.	2016	multiple(N=31)	EU+NA	455391	SES; Family Structure	FAS; Household compostion	IV	Daily breakfast consumption	Daily breakfast consumption	Trend
167	1	Breakfast consumption and its socio-demographic and lifestyle correlates in schoolchildren in 41 countries participating in the HBSC study	Vereecken, C., Dupuy, M., Rasmussen, M., Kelly, C., Nansel, T. R., Al Sabbah, H., Baldassari, D., Jordan, M. D., Maes, L., Niclasen, B. V. L., Ahluwalia, N., Mager, U., de Smet, P., Alexandrova, A., Janssen, I., Krch, F., Maser, M., Ojala, K., Niclassen, B., Németh, Á, Giacchi, M., Dalmasso, P., Rossi, S., Lazzeri, G., Pudule, I., Kololo, H., Craciun, C., Szentagotai, A., Baskova, M., Delgrande, …	2009	multiple(N=41)	EU+NA	204534	SES; Family Structure	FAS; Household compostion	IV	Daily breakfast consumption	Daily breakfast consumption	Sectional
100	1	Gender-specific substance use patterns and associations with individual, family, peer, and school factors in 15-year-old Portuguese adolescents: A latent class regression analysis	Picoito, J., Santos, C., Loureiro, I., Aguiar, P., Nunes, C.	2019	Portugual	EU	1553	SES; family structure; communication with parents	FAS; household compostion; communication with parents	IV	use of alcohol, tobacco; drunkenness	use of alcohol, tobacco; drunkenness	Sectional
98	1	An investigation of the impact of family dynamics on obesity among African American adolescent girls	McDyess, Tina D.	2018	US	NA	806	SES; family structure; Parental promotion of autonomy; Parental emotional support	FAS; Household compostion; perceived parental promotion of autonomy;Parental emotional support	IV	Obesity	BMI	Sectional
120	1	Adolescents, family status, education and health: New insights into health behaviour in school-aged children in Portugal	Gaspar de Matos, Margarida, Borges, Antonio, Capucha, Luis	2011	Portugual	EU	4877	SES	FAS; Parental eduational level	IV	Health-related quality of life; Life satisfaction	KIDSCREEN-10; Life satisfaction scale	Sectional
242		Ethnic differences in youth well-being: The role of sociodemographic background and social support	Runarsdottir, E. M., Vilhjalmsson, R.	2015	Iceland	EU	11435	SES; Family structure; Communication with parents	FAS; Parental employment; Household compostion; Communication with parents	IV	Life satisfaction; Subjective psychosomatic complaints	Life satisfaction; HBSC symptom Checklist	Sectional
27	1	Does the association between different dimension of social capital and adolescent smoking vary by socioeconomic status? a pooled cross-national analysis	Pfortner, T. K., De Clercq, B., Lenzi, M., Vieno, A., Rathmann, K., Moor, I., Hublet, A., Molcho, M., Kunst, A. E., Richter, M.	2015	multiple (N=4)	EU+NA	6511	SES; Parental supportive and reciprocal interactions	FAS; Parental support and reciprocity	IV and moderator	Daily smoking	Daily smoking	Sectional	SES- IV and moderator; Family-related social capital - IV
4	1	Socioeconomic and behavioral determinants of tooth brushing frequency: results from the representative French 2010 HBSC cross-sectional study	de Grado, G. F., Ehlinger, V., Godeau, E., Sentenac, M., Arnaud, C., Nabet, C., Monsarrat, P.	2018	France	EU	7567	SES; Family structure; Relationships with parents; School-related parental support	FAS; Perceived family wealth; Both parents of high socio-professional category; Household composition; Communication with parents; Parental monitoring; Parental bonding; Number of children in family; School-related parental support	IV	Tooth brushing	Tooth brushing	Sectional	"relationship with parents": a composite variable
66	1	Social inequalities in self-rated health: A comparative cross-national study among 32,560 Nordic adolescents	Torsheim, T., Nygren, J. M., Rasmussen, M., Arnarsson, A. M., Bendtsen, P., Schnohr, C. W., Nielsen, L., Nyholm, M.	2018	multiple(N=6)	EU	32560	SES	FAS; subjective family wealth	IV and moderator	Self-rated health	Self-rated health	Sectional
271		Association of alcohol control policies with adolescent alcohol consumption and with social inequality in adolescent alcohol consumption: A multilevel study in 33 countries and regions	Leal-López, E., Moreno-Maldonado, C., Inchley, J., Deforche, B., Van Havere, T., Van Damme, J., Buijs, T., Sánchez-Queija, I., Currie, D., Vieno, A., De Clercq, B.	2020	multiple(N=33)	EU+NA	671084	SES	FAS; Subjective family wealth	IV and moderator	alcohol consumption	alcohol consumption	Sectional	FAS was IV, as well as moderator
276		The role of community social capital in the relationship between socioeconomic status and adolescent life satisfaction: mediating or moderating? Evidence from Czech data	Buijs, T., Maes, L., Salonna, F., Van Damme, J., Hublet, A., Kebza, V., Costongs, C., Currie, C., De Clercq, B.	2016	Czech	EU	4425	SES	FAS; subjective family wealth	IV and moderator	Life satisfaction	Life satisfaction	Sectional	Interaction between SES and social capital
101	1	Associations between socioeconomic and family determinants and weight-control behaviours among adolescents	Tur-Sinai, A., Kolobov, T., Tesler, R., Baron-Epel, O., Dvir, K., Harel-Fisch, Y.	2020	Israel	ME	4390	SES; communication with parents; family support; parental monitoring; family meals	FAS; subjective family wealth; communication with parents; family support; parental monitoring; family meal	IV	Weight-control behaviours	Weight-control behaviours	Sectional
91	1	Adolescent Socioeconomic Status and Mental Health Inequalities in the Netherlands, 2001-2017	Weinberg, D., Stevens, Gwjm, Duinhof, E. L., Finkenauer, C.	2019	Netherlands	EU	27020	SES	FAS; subjective family wealth; personal education level	IV and moderator	Mental Health Problems	Strengths and Difficulties Questionnaire; life satisfaction	Trend	all as IV; subjective family wealth and personal education level - moderator
64	1	Explaining socioeconomic differences in adolescent self-rated health: the contribution of material, psychosocial and behavioural factors	Richter, M., Moor, I., van Lenthe, F. J.	2012	Germany	EU	7274	SES; School-related parental support	FAS; subjective family wealth; school-related parental support	IV	Self-rated health	Self-rated health	Sectional
153	1	Absolute and relative family affluence and psychosomatic symptoms in adolescents	Elgar, F. J., De Clercq, B., Schnohr, C. W., Bird, P., Pickett, K. E., Torsheim, T., Hofmann, F., Currie, C.	2013	multiple(N=8)	EU+NA	48523	SES	FAS; Yitzhaki Index based on FAS; rank affluence within region or school	IV and moderator	Psychosomatic symptoms	HBSC Symptoms Checklist	Sectional
129	1	Social support and family communication as factors protecting adolescents against multiple recurrent health complaints related to school stress	Tabak, I., Mazur, J.	2016	Poland	EU	4432	SES; Family communication; Family support	FAS;Family Dynamics Measure; Family support	IV	subjective health complaints	HBSC Symptom Checklist	Sectional
169	1	Associations between family structure and young people's physical activity and screen time behaviors	Langoy, A., Smith, O. R. F., Wold, B., Samdal, O., Haug, E. M.	2019	Norway	EU	4475	Family structure; SES	Household composition; FAS	IV	Moderate to vigorous physical activity; Organized sport; Screen-based behaviors	Moderate to vigorous physical activity; Organized sport; Screen-based behaviors	Sectional
181	1	Inequalities in toothbrushing among adolescents in Scotland 1998-2006	Levin, K. A., Currie, C.	2009	Scotland	EU	15460	Family structure; SES; parental monitoring	Household composition; FAS	IV	toothbrushing	toothbrushing	Sectional
196	1	Gender and Age Differences in Social Inequality on Adolescent Life Satisfaction: A Comparative Analysis of Health Behaviour Data from 41 Countries	Zaborskis, A., Grincaite, M.	2018	multiple(N=41)	Global	192718	Family structure; SES	household composition; FAS	IV	Life satisfaction	Life satisfaction	Sectional
51	1	Family Social Environment and Parenting Predictors of Alcohol Use among Adolescents in Lithuania	Sumskas, L., Zaborskis, A.	2017	Lithuania	EU	3715	Family structure; SES; Satisfaction with family relationships; Communication with parents; Parental monitoring; Family communication; school-related parental support; Parental emotional support; Parenting style; Family activity; Electronic media communication with parents; Seeing parents	Household composition; FAS; Satisfaction with family relationships; Communication with parents; Parental monitoring; Quality of communication with family; school-related parental support; Parental emotional support; Parenting style; Family time together; Electronic media communication with parents; Seeing parents	IV	Weekly alcohol use	Weekly alcohol use	Sectional
168	1	Irregular breakfast consumption in adolescence and the family environment: Underlying causes by family structure	Levin, K. A., Kirby, J.	2012	Scotland	EU	16406	Family structure; SES; Seeing parents; Perceived parenting; Communication with parents; Communication with siblings	Household composition; FAS; Contact with parents; Perceived parenting; Communication with parents; Communication with siblings	IV and moderator	Irregular breakfast consumption	Daily breakfast consumption	Sectional	Family structure was a moderator
20	1	What role do family composition and functioning play in emotional and behavioural problems among adolescent boys and girls?	Paclikova, K., Dankulincova Veselska, Z., Filakovska Bobakova, D., Palfiova, M., Madarasova Geckova, A.	2019	Slovakia	EU	2908	Family structure; Family support; Family communication; SES	Household composition; Multidimensional Scale of Perceived Social Support; family communication; FAS	IV	Internalizing and externalizing problems	Strengths and Difficulties Questionnaire	Sectional
184	1	Adolescent toothbrushing and the home environment: sociodemographic factors, family relationships and mealtime routines and disorganisation	Levin, K. A., Currie, C.	2010	Scotland	EU	6190	Family structure; SES; Satisfaction with family relationships; Family meals	Household composition; number of siblings; have (not) the second home; FAS; Parental employment; Contact with parents; Perceived parenting; Comunication with parents/siblings; Family evening meal	IV	Tooth brushing	Tooth brushing	Sectional
32	1	Associations of behavioural, psychosocial and socioeconomic factors with over- and underweight among German adolescents	Mikolajczyk, R. T., Richter, M.	2008	Germany	EU	5650	Family structure; SES; communication with parents	Household composition; Parents’ occupational social class ; FAS; communication with parents	IV	Underweight/overweight	BMI	Sectional	SES had two indicators: FAS and parents' OSC
274		National Income and Income Inequality, Family Affluence and Life Satisfaction Among 13 year Old Boys and Girls: A Multilevel Study in 35 Countries	Levin, K. A., Torsheim, T., Vollebergh, W., Richter, M., Davies, C. A., Schnohr, C. W., Due, P., Currie, C.	2011	multiple(N=35)	Global	58364	family structure; SES	Household composition; Ridit transformations of FAS	IV	Life satisfaction	Life satisfaction	Sectional
113	1	Socio-demographic variability in adolescent substance use: Mediation by parents and peers	Wang, J., Simons-Morton, B. G., Farhart, T., Luk, J. W.	2009	US	NA	8795	Family structure; SES; parental monitoring	household compositionl; FAS; parental monitoring	IV and mediator	Substance Use	Sdrinking alcohol; being drunk; smoking cigarettes	Sectional	Family structure; family affluence-IV; parental monitoring- mediator
279		Early adolescent sexual initiation as a problem behavior: A comparative study of five nations	Madkour, A. S., Farhat, T., Halpern, C. T., Godeau, E., Gabhainn, S. N.	2010	multiple(N=5)	EU+NA	5624	family structure; SES	Household compostion; parental education; FAS	IV	sexual initiation	sexual initiation	Sectional
67	1	Associations between family structure and adolescents' food habits	Fismen, A. S., Smith, O. R. F., Samdal, O., Helleve, A., Haug, E.	2020	Norway	EU	4475	Family structure; SES	household compostion; siblings; FAS	IV	Food habits	vegetables/sweets/sugar-added soft drinks consumption	Sectional
240	1	A large-scale national study of gambling severity among immigrant and non-immigrant adolescents: The role of the family	Canale, N., Vieno, A., Griffiths, M. D., Borraccino, A., Lazzeri, G., Charrier, L., Lemma, P., Dalmasso, P., Santinello, M.	2017	Italy	EU	1158	Immigrant status; Family structure; SES; Family support	Immigrant status; Biological/adoptive parents; FAS; Family support	IV and moderator	Problem gambling severity	South Oaks Gambling Screen-Revised for Adolescents	Sectional
5	1	Mental health problems in early adolescents in the Netherlands	Vollebergh, W. A. M., van Dorsselaer, S., Monshouwer, K., Verdurmen, J., van der Ende, J., ter Bogt, T.	2006	Netherlands; Bergen; Norway (Dutch Children)	EU	7556	Immigrant status; SES; Family structure	Immigrant status; FAS; Employment status of parents ; Household composition	IV	Mental health;	YSR	Sectional
52	1	Alcohol consumption in early adolescence: Associations with sociodemographic and psychosocial factors according to gender	Pedroni, C., Dujeu, M., Lebacq, T., Desnouck, V., Holmberg, E., Castetbon, K.	2021	Belgium	EU	4364	Family support; family structure; SES	Multidimensional Scale of Perceived Social Support; Household composition; FAS	IV	Alcohol consumption	Daily alcohol consumption	Sectional
23	1	Intake of sugar sweetened soft drinks among adolescents: Trends and social inequality in Denmark 2002-2018	Holstein, B. E., Damsgaard, M. T., Due, P., Krølner, R. F., Pedersen, T. P., Rasmussen, M.	2020	Denmark	EU	20112	SES	Occupational Social Class; FAS	IV and moderator	Sugar sweetened soft drinks intake	HBSC food frequency questionnaire	Trend
84	1	How family socioeconomic status, peer behaviors, and school-based intervention on healthy habits influence adolescent eating behaviors	Moreno-Maldonado, C., Ramos, P., Moreno, C., Rivera, F.	2018	Spain	EU	6851	SES	Parental educational level; Parental employment; FAS	IV	Eating Habits	Breakfast/fruit/sweets/Soft drinks consumption	Sectional
93	1	Contributing factors in adolescents’ mental well-being—the role of socioeconomic status, social support, and health behavior	Nagy-Pénzes, G., Vincze, F., Bíró, É	2020	Hungary	EU	253	SES	Parental educational level; subjective family wealth; FAS	IV	Life Satisfaction; Depression; Psychosomatic Symptoms	Life Satisfaction; Child Depression Inventory; HBSC Symptom Checklist	Sectional
219	1	Youth injury and parents' unemployment-the importance of socio-economic status and ethnicity context	Maya, S. T., Aviad, T. S., Tanya, K., Orna, B. E., Yossi, H. F.	2020	Israel	ME	13705	SES	Parental employment status; FAS	IV and moderator	Injury	Injury	Sectional	SESinjury is IV, at the same time, it moderated the relationship between parental employment and
138	1	Factors affecting the well-being of adolescents living with unemployed parents in times of economic recession: findings from the Portuguese HBSC study	Frasquilho, D., de Matos, M. G., Marques, A., Gaspar, T., Caldas-de-Almeida, J. M.	2017	Portugual	EU	1311	SES; Satisfaction with the family relationships	Parental employment; FAS; Satisfaction with the family life	IV and moderator	Emotional well-being	single-item self-rated health scale	Sectional	Parental employment-- IV; SES --IV; Satisfaction with the family life-- moderator
163	1	Risk behaviour, parental background, and wealth: A cluster analysis among Swedish boys and girls in the HBSC study	Carlerby, H., Viitasara, E., Knutsson, A., Gådin, K. G.	2012	Sweden	EU	11972	Immigrant Status; SES	Parental Immigrant Status; FAS	IV	Drunkenness; Smoking; Physical activity; Wish to lose weight; Inadequate tooth brushing; Vegetables and soft-drink consumption	Drunkenness; Smoking; Physical activity; Wish to lose weight; Inadequate tooth brushing; Vegetables and soft-drink consumption	Sectional
155	1	Subjective health complaints among boys and girls in the Swedish HBSC study: Focussing on parental foreign background	Carlerby, H., Viitasara, E., Knutsson, A., Gillander Gådin, K.	2011	Sweden	EU	11268	Immigrant Status; SES; Family Structure	Parental Immigrant Status; FAS; Household composition	IV	Subjective health complaints	HBSC Symptoms Checklist	Sectional
150	1	Social Capital as a Moderator of the Relationship Between Perceived Discrimination and Alcohol and Cannabis Use Among Immigrant and Non-immigrant Adolescents in Israel	Walsh, S. D., Kolobov, T., Harel-Fisch, Y.	2018	Israel	ME	8598	Parental monitoring; SES; Immigrant status	Parental monitoring; FAS; Immigrant status	IV and moderator	Substance Use	Alcohol/cannabis use	Sectional	Parental monitoring- IV and mod; SES, Immigrant status--IV
47	1	The relationship between parental socio-economic status and episodes of drunkenness among adolescents: findings from a cross-national survey	Richter, M., Leppin, A., Gabhainn, S. N.	2006	multiple(N=28)	EU+NA	142868	SES	parents' occupational level; FAS	IV	Drunkenness	Drunkenness	Sectional
237	1	Socialization instances linked to cannabis experimentation among French teenagers	Jovic, S., Genolini, C., Delpierre, C., Spilka, S., Ehlinger, V., Ross, J., Arnaud, C., Godeau, E.	2014	France	EU	4175	SES; Family structure;Communication with parents; Parental monitoring	Parents’ occupational social class; FAS; Household composition; Communication with parents; Parental monitoring	IV	Cannabis Experimentation	cannabis consumption	Sectional
243		Relative deprivation and disordered gambling in youths	Elgar, F. J., Canale, N., Wohl, M. J. A., Lenzi, M., Vieno, A.	2018	Italy	EU	19321	SES; family support	proportional ranks of FAS; Yitzhaki index based on FAS; family support	IV and moderator	Disordered gambling	South Oaks Gambling Screen-Revised for Adolescents	Sectional
241		The Happiest Kids on Earth. Gender Equality and Adolescent Life Satisfaction in Europe and North America	de Looze, M. E., Huijts, T., Stevens, G. W. J. M., Torsheim, T., Vollebergh, W. A. M.	2018	multiple(N=34)	EU+NA	171528	SES; Family structure; Communication with parents	Rank of FAS; Family structure; Communication with parents	IV	Life satisfaction	Life satisfaction	Sectional
65	1	Socioeconomic inequalities in health among Swedish adolescents - adding the subjective perspective	Ahlborg, M., Svedberg, P., Nyholm, M., Morgan, A., Nygren, J. M.	2017	Sweden	EU	23008	SES	subjective family wealth; FAS	IV and moderator	self-rated health	subjective health complaints; lifesatisfaction; health perception	Trend
75	1	Socioeconomic Inequalities in Health among Armenian Adolescents	Torchyan, A. A., Bosma, H.	2020	Armenia	ME	3679	SES	subjective family wealth; FAS	IV	Perceived health status; Psychosocial well-being ; psychosomatic symptoms	self-rated health; Cantril Ladder wellbeing scale; HBSC Symptom Check List	Sectional
89	1	Mental health inequalities in Slovenia 15-year-old adolescents explained by personal social position and family socioeconomic status	Klanšček, H. J., Žiberna, J., Korošec, A., Zurc, J., Albreht, T.	2014	Slovenia	EU	1644	SES	subjective family wealth; FAS; parental employment; family structure; personal social position	IV	Mental health	KIDSCREEN-10; Feelings of depression; Life satisfaction; The Strengths and Difficulties Questionnaire	Sectional
156	1	Relative deprivation and risk factors for obesity in Canadian adolescents	Elgar, F. J., Xie, A., Pförtner, T. K., White, J., Pickett, K. E.	2016	Canada	NA	25311	SES	Subjective family wealth; School-level absolute deprivation based on FAS; Yitzhaki index based on FAS	IV	lifestyle risk factors of obesity	Breakfasts; Physical activity; Healthful food choices; Unhealthful food choices	Sectional
160	1	Relative deprivation and episodes of drunkenness among French and Canadian adolescents	Sentenac, M., Ehlinger, V., Napoletano, A., Spilka, S., Gariepy, G., Godeau, E., Elgar, F. J.	2017	multiple(N=3)	EU+NA	5901	SES	sum of FAS; Group-mean centred deprivation; Rank in the deprivation distribution; Yitzhaki index based on FAS; School-level affluence based on FAS	IV	Drunkenness	Drunkenness	Sectional
