# Supplementary material for: Family Related Variables’ Influences on Adolescents’ Health Based on Health Behaviour in School-Aged Children Database, an AI-Assisted Scoping Review, and Narrative Synthesis
Source: Front Psychol. 2022 Aug 10;13:871795. doi: 10.3389/fpsyg.2022.871795 (PMC9400839; doi:10.3389/fpsyg.2022.871795)
Supplement: Supplementary file 8 [file Table_7.XLSX]

## Sheet: Sheet1
Synthesis of articles adopting parental occupational social class to measure SES
New ID	Decision	Title	Authors	Publication Year	Country	Area	Sample size	Family Variable	Measurement for family	Family role (IV/Mediator/Moderator)	Children's health outcomes	Measurements for children	Design (Sectional/Trend)	Note
145	1	Family-related school issues and the mental health of adolescents: Post hoc analyses of the Portuguese national health behaviour in school-aged children survey data	Matos, M. G., Dadds, M. R., Barrett, P. M.	2006	Portugual	EU	5326	Communcation with parents; School-related parental support; SES	Communcation with parents; School related parental support; Father’s occupational social class	IV	Anxiety/Depression; Physical Health	HBSC Symptom Checklist; Self-rated health; Depression	Sectional
85	1	Close relations to parents and emotional symptoms among adolescents: beyond socio-economic impact?	Damsgaard, M. T., Holstein, B. E., Koushede, V., Madsen, K. R., Meilstrup, C., Nelausen, M. K., Nielsen, L., Rayce, S. B.	2014	Denmark	EU	15646	Communication with parents; SES	Communication with parents; parents' occupational class	IV and moderator	Emotional symptoms	HBSC Symptom Check List	Sectional	Relationship - IV; SES - moderator
63	1	Breakfast frequency among adolescents: associations with measures of family functioning	Pedersen, T. P., Holstein, B. E., Damsgaard, M. T., Rasmussen, M.	2016	Denmark	EU	3054	SES; communication with parents; family communication; family support	communication with parents; Quality of family communication; family support; parents' occupational social class; migration status; household composition	IV	Breakfast consumption	Breakfast consumption during weekdays	Sectional
225	1	Lunch frequency among adolescents: Associations with sociodemographic factors and school characteristics	Pedersen, T. P., Holstein, B. E., Krolner, R., Ersbøll, A. K., Jørgensen, T. S., Aarestrup, A. K., Utter, J., McNaughton, S. A., Neumark-Stzainer, D., Rasmussen, M.	2016	Denmark	EU	4429	SES; immigrant status; family structure	family occupational social class; immigrant status; household composition	IV	lunch frequency		Sectional
43	1	Family as a child development context and smoking behaviour among schoolchildren in Greenland	Granado Alcon, M. C., Pedersen, J. M.	2001	Greenland	EU	1648	SES; Family structure	Father's occupational social class; Household composition; Biological/broken/restructured family	IV	Smoking behaviour	Smoking frequency	Sectional
31	1	Emotional symptoms among adolescents: epidemiological analysis of individual-, classroom- and school-level factors	Meilstrup, C., Ersboll, A. K., Nielsen, L., Koushede, V., Bendtsen, P., Due, P., Holstein, B. E.	2015	Denmark	EU	4032	Family structure; Immigrant status; SES	Household composition; Migration status; Parents’ occupational social class	IV	Emotional symptoms	HBSC Symptom Check List	Sectional
32	1	Associations of behavioural, psychosocial and socioeconomic factors with over- and underweight among German adolescents	Mikolajczyk, R. T., Richter, M.	2008	Germany	EU	5650	Family structure; SES; communication with parents	Household composition; Parents’ occupational social class ; FAS; communication with parents	IV	Underweight/overweight	BMI	Sectional	SES had two indicators: FAS and parents' OSC
69	1	The influence of family structure on breakfast habits among adolescents	Jorgensen, A., Pedersen, T. P., Meilstrup, C. R., Rasmussen, M.	2011	Denmark	EU	6269	Family structure; SES	Household compostion; Parents' occupational social class	IV	Breakfast consumption	Breakfast consumption during weekdays	Sectional
23	1	Intake of sugar sweetened soft drinks among adolescents: Trends and social inequality in Denmark 2002-2018	Holstein, B. E., Damsgaard, M. T., Due, P., Krølner, R. F., Pedersen, T. P., Rasmussen, M.	2020	Denmark	EU	20112	SES	Occupational Social Class; FAS	IV and moderator	Sugar sweetened soft drinks intake	HBSC food frequency questionnaire	Trend
146	1	The influence of parental occupation and the pupils' educational level on lifestyle behaviors among adolescents in Belgium	Vereecken, C. A., Maes, L., De Bacquer, D.	2004	Belgium Flanders	EU	7613	SES	Parental occupational status; children's educational level	IV and moderator	Health lifestyle	food habits; substance use; physical inactivity; dental care	Sectional	But no interaction between SES, gender and age
47	1	The relationship between parental socio-economic status and episodes of drunkenness among adolescents: findings from a cross-national survey	Richter, M., Leppin, A., Gabhainn, S. N.	2006	multiple(N=28)	EU+NA	142868	SES	parents' occupational level; FAS	IV	Drunkenness	Drunkenness	Sectional
56	1	Greenlandic family structure and communication with parents: influence on schoolchildren's drinking behaviour	del Carmen, M., Alcón, G., Pedersen, J. M., María, A., González, C.	2002	Greenland	EU	1648	SES; Family structure; communication with parents	parents' occupational level; Household composition; communication with parents	IV	Alcohol consumption	Alcohol consumption	Sectional
270		Persistent social inequality in low life satisfaction among adolescents in Denmark 2002-2018	Holstein, B. E., Damsgaard, M. T., Madsen, K. R., Rasmussen, M.	2020	Denmark	EU	20328	SES	Parents' occupational social class	IV and moderator	Life satisfaction	Life satisfaction	Trend
7	1	Social inequality in adolescent daily smoking: Has it changed over time?	Rasmussen, M., Due, P., Damsgaard, M. T., Holstein, B. E.	2009	Denmark	EU	6703	SES	Parents’ occupational social class	IV and moderator	Smoking behaviour	Daily smoking	Trend
228	1	High and low levels of positive mental health: are there socioeconomic differences among adolescents?	Nielsen, L., Stewart-Brown, S., Vinther-Larsen, M., Meilstrup, C., Holstein, B. E., Koushede, V.	2016	Denmark	EU	3670	SES	Parents’ occupational social class	IV	Positive mental health	self-esteem; social competence	Sectional
259		Fruit and vegetable intake in adolescents: Association with socioeconomic status and exposure to supermarkets and fast food outlets	Svastisalee, C. M., Holstein, B. E., Due, P.	2012	Denmark	EU	6034	SES	Parents’ occupational social class	IV and moderator	Fruit/vegetable consumption	Fruit/vegetable consumption	Sectional
11	1	Trends in socioeconomic differences in daily smoking among 15-year-old Danes 1991-2014	Holstein, B. E., Andersen, A., Damsgaard, M. T., Due, P., Bast, L. S., Rasmussen, M.	2020	Denmark	EU	8641	SES	Parents’ occupational social class	IV and moderator	Smoking	Daily smoking	Trend
13	1	Brief report: Trends in social inequality in drunkenness among Danish adolescents, 1991–2014	Bendtsen, Pernille, Andersen, Anette, Damsgaard, Mogens Trab, Due, Pernille, Rasmussen, Mette, Holstein, Bjørn E.	2018	Denmark	EU	8655	SES	Parents’ occupational social class	IV and moderator	Frequency of drunkenness	Frequency of drunkenness	Trend
15	1	Increasing prevalence of emotional symptoms in higher socioeconomic strata: Trend study among Danish schoolchildren 1991–2014	Due, P., Damsgaard, M. T., Madsen, K. R., Nielsen, L., Rayce, S. B., Holstein, B. E.	2019	Denmark	EU	31169	SES	Parents’ occupational social class	IV and moderator	Emotional symptoms	HBSC Symptom Check List	Trend
16	1	Trends in social inequality in physical inactivity among Danish adolescents 1991–2014	Johnsen, N. F., Toftager, M., Melkevik, O., Holstein, B. E., Rasmussen, M.	2017	Denmark	EU	30974	SES	Parents’ occupational social class	IV and moderator	Physical inactivity	Vigorous physical activity	Trend
17	1	Persistent social inequality in medicine use for headache among adolescents in Denmark 1991–2014	Holstein, B. E., Denbæk, A. M., Andersen, A., Due, P.	2019	Denmark	EU	26685	SES	Parents’ occupational social class	IV and moderator	Headache	Medication for headache	Trend
18	1	Trends in social inequality in overweight and obesity among adolescents in Denmark 1998-2018	Rasmussen, M., Damsgaard, M. T., Morgen, C. S., Kierkegaard, L., Toftager, M., Rosenwein, S. V., Krolner, R. F., Due, P., Holstein, B. E.	2020	Denmark	EU	22177	SES	Parents’ occupational social class	IV and moderator	Overweight and obesity	BMI	Trend
21	1	Persistent social inequality in low intake of vegetables among adolescents, 2002-2014	Rasmussen, M., Pedersen, T. P., Johnsen, N. F., Krolner, R. F., Holstein, B. E.	2018	Denmark	EU	17243	SES	Parents’ occupational social class	IV and moderator	Vegetable intake	Vegetable intake frequency	Trend
24	1	Recurrent abdominal pain among adolescents: Trends and social inequality 1991-2018	Holstein, B. E., Damsgaard, M. T., Ammitzbøll, J., Madsen, K. R., Pedersen, T. P., Rasmussen, M.	2021	Denmark	EU	30048	SES	Parents’ occupational social class	IV and moderator	Recurrent abdominal pain	HBSC stomach-ache symptom check	Trend
29	1	Body mass index and smoking: cross-sectional study of a representative sample of adolescents in Denmark	Dhariwal, M., Rasmussen, M., Holstein, B. E.	2010	Denmark	EU	2799	SES	Parents’ occupational social class	moderator	Smoking behaviour	Daily smoking	Sectional
237	1	Socialization instances linked to cannabis experimentation among French teenagers	Jovic, S., Genolini, C., Delpierre, C., Spilka, S., Ehlinger, V., Ross, J., Arnaud, C., Godeau, E.	2014	France	EU	4175	SES; Family structure;Communication with parents; Parental monitoring	Parents’ occupational social class; FAS; Household composition; Communication with parents; Parental monitoring	IV	Cannabis Experimentation	cannabis consumption	Sectional
149	1	Social class variation in medicine use among adolescents	Holstein, B. E., Hansen, E. H., Due, P.	2004	Denmark	EU	5205	SES	parents’ occupational status	IV	Use of medicine		Sectional
