# Supplementary material for: Family Related Variables’ Influences on Adolescents’ Health Based on Health Behaviour in School-Aged Children Database, an AI-Assisted Scoping Review, and Narrative Synthesis
Source: Front Psychol. 2022 Aug 10;13:871795. doi: 10.3389/fpsyg.2022.871795 (PMC9400839; doi:10.3389/fpsyg.2022.871795)
Supplement: Supplementary file 9 [file Table_8.XLSX]

## Sheet: FamilyCommunication
Synthesis of articles that measured family communication
New ID	Decision	Title	Authors	Publication Year	Country	Area	Sample size	Family Variable	Measurement for family	Family role (IV/Mediator/Moderator)	Children's health outcomes	Measurements for children	Design (Sectional/Trend)	Note
20	1	What role do family composition and functioning play in emotional and behavioural problems among adolescent boys and girls?	Paclikova, K., Dankulincova Veselska, Z., Filakovska Bobakova, D., Palfiova, M., Madarasova Geckova, A.	2019	Slovakia	EU	2908	Family structure; Family support; Family communication; SES	Household composition; Multidimensional Scale of Perceived Social Support; family communication; FAS	IV	Internalizing and externalizing problems	Strengths and Difficulties Questionnaire	Sectional
34	1	Familial determinants of current smoking among adolescents of Lithuania: a cross-sectional survey 2014	Zaborskis, A., Sirvyte, D.	2015	Lithuania	EU	3696	SES; Family structure; Communication with parents; Family communication; Satisfaction with family relationships; Parental monitoring; Parental emotional support; Parental promotion of autonomy; Family time together; School-related parental support; Parenting style; Electronic media communication with parents; Seeing of parents	FAS; Household composition; Communication with parents;Short Version of Family Dynamics Measure II; Satisfaction with family relationships; Parental monitoring; Parental bonding (two-dimension); Joint family activity; School-related parental support; Parental disciplinary styles measurement; Electronic media communication with parents; Seeing of parents	IV	Smoking behaviour	Smoking behaviour	Sectional
51	1	Family Social Environment and Parenting Predictors of Alcohol Use among Adolescents in Lithuania	Sumskas, L., Zaborskis, A.	2017	Lithuania	EU	3715	Family structure; SES; Satisfaction with family relationships; Communication with parents; Parental monitoring; Family communication; school-related parental support; Parental emotional support; Parenting style; Family activity; Electronic media communication with parents; Seeing parents	Household composition; FAS; Satisfaction with family relationships; Communication with parents; Parental monitoring; Quality of communication with family; school-related parental support; Parental emotional support; Parenting style; Family time together; Electronic media communication with parents; Seeing parents	IV	Weekly alcohol use	Weekly alcohol use	Sectional
63	1	Breakfast frequency among adolescents: associations with measures of family functioning	Pedersen, T. P., Holstein, B. E., Damsgaard, M. T., Rasmussen, M.	2016	Denmark	EU	3054	SES; communication with parents; family communication; family support	communication with parents; Quality of family communication; family support; parents' occupational social class; migration status; household composition	IV	Breakfast consumption	Breakfast consumption during weekdays	Sectional
117	1	School, Peer and Family Relationships and Adolescent Substance Use, Subjective Wellbeing and Mental Health Symptoms in Wales: a Cross Sectional Study	Moore, G. F., Cox, R., Evans, R. E., Hallingberg, B., Hawkins, J., Littlecott, H. J., Long, S. J., Murphy, S.	2018	Wales	EU	8009	family support; family communication	family support; family communication	IV and moderator	substance use; subjective wellbeing; mental health symptoms	tobacco use; cannabis use; alcohol use; subjective wellbeing; HBSC-Symptom checklist	Sectional
118	1	Clustering of health-related behaviours and its relationship with individual and contextual factors in Portuguese adolescents: results from a cross-sectional study	dos Santos, C. S., Picoito, J., Loureiro, I., Nunes, C.	2020	Portugual	EU	4036	SES; Family structure;Family communication	FAS; Household composition; communication with parents	IV	Health behaviours	physical activity; eating habit; substance use	Sectional
129	1	Social support and family communication as factors protecting adolescents against multiple recurrent health complaints related to school stress	Tabak, I., Mazur, J.	2016	Poland	EU	4432	SES; Family communication; Family support	FAS;Family Dynamics Measure; Family support	IV	subjective health complaints	HBSC Symptom Checklist	Sectional
142	1	What is worse? A hierarchy of family-related risk factors predicting alcohol use in adolescence	Kuntsche, E. N., Kuendig, H.	2006	Switzerland	EU	3127	Family Structure; Family drinking; Family communication; Family activity; Family support	Family Structure; Perception of excessive drinking in the family; Family communication; Family activity; Family support	IV	alcohol use	Frequency of alcoholic beverage intake; drunkenness	Sectional
152	1	Prevalence and familial predictors of suicidal behaviour among adolescents in Lithuania: a cross-sectional survey 2014	Zaborskis, A., Sirvyte, D., Zemaitiene, N.	2016	Lithuania	EU	2542	SES; Family structure; Family communication; Satisfaction with family relationships; Parental monitoring; Emotional support; School-related parental support; Parenting style; Family activity; Electronic media communication with parents; Seeing the parents	FAS; Household composition; Communication with Parents; Family Dynamics Measure; Satisfaction with family relationships; Parental monitoring; Parental bonding; parental disciplinary styles; Family activities; Electronic media communication with parents; Seeing the parents	IV	Suicide and self-harm	Youth Risk Behaviour Survey	Sectional
180	1	Interpersonal relationships as predictors of positive health among Irish youth: the more the merrier?	Molcho, M., Gabhainn, S. N., Kelleher, C. C.	2007	Ireland	EU	8424	Family communications	Communcation with parents and siblings	IV	physical/emotional symptoms; Life satisfaction; positive life; happiness	HBSC Symptom Checklist; Life satisfaction; Wellbeing scale; General lifer happiness	Sectional
226	1	Social and behavioral predictors of adolescents’ positive attitude towards life and self	Malinowska-Cieślik, M., Mazur, J., Nałęcz, H., Małkowska-Szkutnik, A.	2019	Poland	EU	2939	SES; family communication	FAS; Family Dynamics Measure II	IV	Positive Attitude	Positive Attitude Scale	Sectional
238	1	The role of family and computer-mediated communication in adolescent loneliness	Favotto, L., Michaelson, V., Pickett, W., Davison, C.	2019	Canada	NA	30117	Family communication	Family Dynamics Measure II	moderator	Self-perceived loneliness	Self-perceived loneliness	Sectional

## Sheet: SatisfactionWithFamilyRelation
Synthesis of articles that measured satisfaction with family relation
New ID	Decision	Title	Authors	Publication Year	Country	Area	Sample size	Family Variable	Measurement for family	Family role (IV/Mediator/Moderator)	Children's health outcomes	Measurements for children	Design (Sectional/Trend)	Note
34	1	Familial determinants of current smoking among adolescents of Lithuania: a cross-sectional survey 2014	Zaborskis, A., Sirvyte, D.	2015	Lithuania	EU	3696	SES; Family structure; Communication with parents; Family communication; Satisfaction with family relationships; Parental monitoring; Parental emotional support; Parental promotion of autonomy; Family time together; School-related parental support; Parenting style; Electronic media communication with parents; Seeing of parents	FAS; Household composition; Communication with parents;Short Version of Family Dynamics Measure II; Satisfaction with family relationships; Parental monitoring; Parental bonding (two-dimension); Joint family activity; School-related parental support; Parental disciplinary styles measurement; Electronic media communication with parents; Seeing of parents	IV	Smoking behaviour	Smoking behaviour	Sectional
51	1	Family Social Environment and Parenting Predictors of Alcohol Use among Adolescents in Lithuania	Sumskas, L., Zaborskis, A.	2017	Lithuania	EU	3715	Family structure; SES; Satisfaction with family relationships; Communication with parents; Parental monitoring; Family communication; school-related parental support; Parental emotional support; Parenting style; Family activity; Electronic media communication with parents; Seeing parents	Household composition; FAS; Satisfaction with family relationships; Communication with parents; Parental monitoring; Quality of communication with family; school-related parental support; Parental emotional support; Parenting style; Family time together; Electronic media communication with parents; Seeing parents	IV	Weekly alcohol use	Weekly alcohol use	Sectional
99	1	Psychosocial factors of different health behaviour patterns in adolescents: Association with overweight and weight control behaviours	Veloso, S. M., Matos, M. G., Carvalho, M., Diniz, J. A.	2012	Portugual	EU	3069	satisfaction with family relationships; communication with parents;	satisfaction with family relationships; communication with parents;	IV	Health Behaviours	physical activity; sedentary behaviours	Sectional
112	1	Emotional and Psychosocial Factors Associated With Drunkenness and the Use of Tobacco and Cannabis in Adolescence: Independent or Interactive Effects?	García-Moya, I., Ortiz Barón, M. J., Moreno, C.	2017	Spain	EU	1752	parental emotional support; communication with parents; parental monitoring; satisfaction with family relationships	parental emotional support; communication with parents; parental monitoring; satisfaction with family relationships	IV and moderator	substance use	drunkenness; tobacco use; cannabisuse	Sectional
152	1	Prevalence and familial predictors of suicidal behaviour among adolescents in Lithuania: a cross-sectional survey 2014	Zaborskis, A., Sirvyte, D., Zemaitiene, N.	2016	Lithuania	EU	2542	SES; Family structure; Family communication; Satisfaction with family relationships; Parental monitoring; Emotional support; School-related parental support; Parenting style; Family activity; Electronic media communication with parents; Seeing the parents	FAS; Household composition; Communication with Parents; Family Dynamics Measure; Satisfaction with family relationships; Parental monitoring; Parental bonding; parental disciplinary styles; Family activities; Electronic media communication with parents; Seeing the parents	IV	Suicide and self-harm	Youth Risk Behaviour Survey	Sectional
182	1	Characterization of Resilient Adolescents in the Context of Parental Unemployment	Moreno-Maldonado, C., Jimenez-Iglesias, A., Rivera, F., Moreno, C.	2020	Spain	EU	908	SES; Family structure; Family support; Satisfaction with family relationships	Parental educational level; subjective family wealth; Household composition; Family support; Family satisfaction	IV	Global Health Score	life satisfaction; heath-related quality of life; self-reported health	Sectional
184	1	Adolescent toothbrushing and the home environment: sociodemographic factors, family relationships and mealtime routines and disorganisation	Levin, K. A., Currie, C.	2010	Scotland	EU	6190	Family structure; SES; Satisfaction with family relationships; Family meals	Household composition; number of siblings; have (not) the second home; FAS; Parental employment; Contact with parents; Perceived parenting; Comunication with parents/siblings; Family evening meal	IV	Tooth brushing	Tooth brushing	Sectional
199	1	Factors associated with life satisfaction of adolescents living with employed and unemployed parents in Spain and Portugal: A person focused approach	Moreno-Maldonado, C., Jimenez-Iglesias, A., Camacho, I., Rivera, F., Moreno, C., Matos, M. G.	2020	multiple(N=2)	EU	21081	Satisfaction with family relationships; SES	family satisfaction; Parental employment status	IV	Life satisfaction	Life satisfaction	Sectional
209	1	Life Satisfaction, Physical Activity and Quality of Life Associated with the Health of School-Age Adolescents	Urchaga, J. D., Guevara, R. M., Cabaco, A. S., Moral-Garcia, J. E.	2020	Spain	EU	1226	Satisfaction with family relationships	Family life satisfaction	IV	Sports physical activity; personal life satisfaction; Quality of Life Associated with Health	Sports physical activity; personal life satisfaction; Quality of Life Associated with Health	Sectional
221	1	Suicidal thoughts and depressive feelings amongst Estonian schoolchildren: effect of family relationship and family structure	Samm, A., Tooding, L. M., Sisask, M., Kolves, K., Aasvee, K., Varnik, A.	2010	Estonia	EU	4389	satisfaction with family relationships; communication with parents; family structures; SES	family satisfaction; communication with parents; household composition; family economic deprivation based on FAS	IV	suicidal ideation; depressive feelings	suicidal ideation; depressive feelings	Sectional
239	1	Bullying, family resources, and mental health: A test of the ABC-X theory	Resnick, Elise M.	2014	US	NA	9198	Communication with parents; Seeing parents; Satisfaction with Family Relationships	Communication with parents; Seeing parents; Satisfaction with Family Relationships	IV and moderator	Mental health; Life satisfaction	Mental health; Life satisfaction	Sectional	no sig mod effect
283		Exploring Sex Differences in the Association between Bullying Involvement and Alcohol and Marijuana Use among US Adolescents in 6(th) to 10(th) Grade	Lee, J., Choi, M. J., Thornberg, R., Hong, J. S.	2020	US	NA	7084	Parental monitoring; parental emotional support; SES; Satisfaction with family relationships	Parental monitoring; parental emotional support; subjective family wealth; Family satisfaction	IV	alcohol use; marijuana use	alcohol use; marijuana use	Sectional

## Sheet: Family support
Synthesis of articles that measured family support
New ID	Decision	Title	Authors	Publication Year	Country	Area	Sample size	Family Variable	Measurement for family	Family role (IV/Mediator/Moderator)	Children's health outcomes	Theme_outcome	Measurements for children	Design (Sectional/Trend)	Note
129	1	Social support and family communication as factors protecting adolescents against multiple recurrent health complaints related to school stress	Tabak, I., Mazur, J.	2016	Poland	EU	4432	SES; Family communication; Family support	FAS;Family Dynamics Measure; Family support	IV	subjective health complaints	Global health	HBSC Symptom Checklist	Sectional
182	1	Characterization of Resilient Adolescents in the Context of Parental Unemployment	Moreno-Maldonado, C., Jimenez-Iglesias, A., Rivera, F., Moreno, C.	2020	Spain	EU	908	SES; Family structure; Family support; Satisfaction with family relationships	Parental educational level; subjective family wealth; Household composition; Family support; Family satisfaction	IV	Global Health Score	Global health	life satisfaction; heath-related quality of life; self-reported health	Sectional
255		Empowerment-enabling home and school environments and self-rated health among Finnish adolescents	Simonsen, N., Lahti, A., Suominen, S., Välimaa, R., Tynjälä, J., Roos, E., Kannas, L.	2020	Finland	EU	7802	Home atmosphere; Family support	Home atmosphere; Family support	IV	Self-rated health	Global health	Self-rated health	Sectional
258		The sources of support and their relation on the global health of adopted and non-adopted adolescents	Paniagua, C., Moreno, C., Rivera, F., Ramos, P.	2019	Spain	EU	28768	Family support	Family support	IV	Global Health Score	Global health	Life satisfaction; Self-reported health; Health-related quality of life (Kidscreen-10); Psychosomatic complaints (HBSC Symptom Checklist)	Sectional
52	1	Alcohol consumption in early adolescence: Associations with sociodemographic and psychosocial factors according to gender	Pedroni, C., Dujeu, M., Lebacq, T., Desnouck, V., Holmberg, E., Castetbon, K.	2021	Belgium	EU	4364	Family support; family structure; SES	Multidimensional Scale of Perceived Social Support; Household composition; FAS	IV	Alcohol consumption	Health Behave	Daily alcohol consumption	Sectional
63	1	Breakfast frequency among adolescents: associations with measures of family functioning	Pedersen, T. P., Holstein, B. E., Damsgaard, M. T., Rasmussen, M.	2016	Denmark	EU	3054	SES; communication with parents; family communication; family support	communication with parents; Quality of family communication; family support; parents' occupational social class; migration status; household composition	IV	Breakfast consumption	Health Behave	Breakfast consumption during weekdays	Sectional
101	1	Associations between socioeconomic and family determinants and weight-control behaviours among adolescents	Tur-Sinai, A., Kolobov, T., Tesler, R., Baron-Epel, O., Dvir, K., Harel-Fisch, Y.	2020	Israel	ME	4390	SES; communication with parents; family support; parental monitoring; family meals	FAS; subjective family wealth; communication with parents; family support; parental monitoring; family meal	IV	Weight-control behaviours	Health Behave	Weight-control behaviours	Sectional
117	1	School, Peer and Family Relationships and Adolescent Substance Use, Subjective Wellbeing and Mental Health Symptoms in Wales: a Cross Sectional Study	Moore, G. F., Cox, R., Evans, R. E., Hallingberg, B., Hawkins, J., Littlecott, H. J., Long, S. J., Murphy, S.	2018	Wales	EU	8009	family support; family communication	family support; family communication	IV and moderator	substance use; subjective wellbeing; mental health symptoms	Health Behave	tobacco use; cannabis use; alcohol use; subjective wellbeing; HBSC-Symptom checklist	Sectional	family support: moderator
142	1	What is worse? A hierarchy of family-related risk factors predicting alcohol use in adolescence	Kuntsche, E. N., Kuendig, H.	2006	Switzerland	EU	3127	Family Structure; Family drinking; Family communication; Family activity; Family support	Family Structure; Perception of excessive drinking in the family; Family communication; Family activity; Family support	IV	alcohol use	Health Behave	Frequency of alcoholic beverage intake; drunkenness	Sectional
8	1	Individual and social determinants of early sexual activity: A study of gender-based differences using the 2018 Canadian Health Behaviour in School-aged Children Study (HBSC)	Gazendam, N., Cleverley, K., King, N., Pickett, W., Phillips, S. P.	2020	Canada	NA	6154	SES; Family support; Family structure	Subjective family wealth; Family support; Household composition	IV	Early Sexual Activity	Health behave	Sexual activity	Sectional
185	1	Sexual behaviour in 15-year-old adolescents: Insights into the role of family, peer, teacher, and classmate support	Borraccino, A., Lo Moro, G., Dalmasso, P., Nardone, P., Donati, S., Berchialla, P., Charrier, L., Lenzi, M., Spinelli, A., Lemma, P.	2020	Italy	EU	18918	Family structure; family support	Household composition; Family support	IV	Early sexual intercourse	health behave	Sexual intercourse	Sectional
268		Social support from developmental contexts and adolescent substance use and well-being: A comparative study of Spain and Portugal	Jiménez-Iglesias, A., Camacho, I., Rivera, F., Moreno, C., De Matos, M. G.	2017	multiple(N=2)	EU	28394	Family support	Family support	IV	Substance Use; wellbeing	Health Behave, mental health	Life satisfaction; Health-related quality of life(KIDSCREEN-10)	Sectional
20	1	What role do family composition and functioning play in emotional and behavioural problems among adolescent boys and girls?	Paclikova, K., Dankulincova Veselska, Z., Filakovska Bobakova, D., Palfiova, M., Madarasova Geckova, A.	2019	Slovakia	EU	2908	Family structure; Family support; Family communication; SES	Household composition; Multidimensional Scale of Perceived Social Support; family communication; FAS	IV	Internalizing and externalizing problems	Mental health	Strengths and Difficulties Questionnaire	Sectional
77	1	Connectedness as a protective factor in immigrant youth: results from the Health Behaviours in School-aged Children (HBSC) Italian study	Borraccino, A., Berchialla, P., Dalmasso, P., Sciannameo, V., Vieno, A., Lazzeri, G., Charrier, L., Lemma, P.	2020	Italy	EU	47399	SES; Family support	FAS; Family support	IV	Life satisfaction; Health complaints;	Mental health	Life satisfaction; HBSC Symptom Checklist	Sectional
133	1	Physical activity and features of the environment in which school children grow up as low mood determinants	Kleszczewska, D., Siedlecka, J., Mazur, J.	2019	Poland	EU	5195	SES; Family structure;Family support	FAS; Household composition; Family support	IV	general wellbeing;	Mental health	WHO-5 wellbeing screen test	Sectional
148	1	Mental Health in Adolescents with a Migration Background in 29 European Countries: The Buffering Role of Social Capital	Delaruelle, K., Walsh, S. D., Dierckens, M., Deforche, B., Kern, M. R., Currie, C., Maldonado, C. M., Cosma, A., Stevens, G. W. J. M.	2021	multiple(N=29)	EU	121751	Immigrant status; Family support	Immigrant status; Family support	IV and moderator	Mental health	Mental health	Life dissatisfaction; HBSC Symptoms Checklist	Sectional	Family support*Immigrant
172	1	Self-harm in adolescence: protective health assets in the family, school and community	Klemera, E., Brooks, F. M., Chester, K. L., Magnusson, J., Spencer, N.	2017	England	EU	1521	Communication with parents; family activity; Parental promotion of autonomy; Family support	Communication with parents; family activites; Personal autonomy in relation to family; Family support	IV	Self-harm	Mental health	Self-harm	Sectional
215	1	Life Satisfaction in Adolescents: The Role of Individual and Social Health Assets	Calmeiro, L., Camacho, I., de Matos, M. G.	2018	Portugual	EU	3494	Family support; Parental monitoring	Family support; Parental monitoring	IV	Life Satisfaction	Mental health	Life Satisfaction	Sectional
222	1	The Prevalence and Predictors of Suicidal Ideation Among Slovene Adolescents	Bračič, M., Roškar, S., Zager Kocjan, G., Jeriček Klanšček, H.	2019	Slovenia	EU	1547	Family support	family support	IV	suicidal ideation	Mental health	suicidal ideation	Sectional
240	1	A large-scale national study of gambling severity among immigrant and non-immigrant adolescents: The role of the family	Canale, N., Vieno, A., Griffiths, M. D., Borraccino, A., Lazzeri, G., Charrier, L., Lemma, P., Dalmasso, P., Santinello, M.	2017	Italy	EU	1158	Immigrant status; Family structure; SES; Family support	Immigrant status; Biological/adoptive parents; FAS; Family support	IV and moderator	Problem gambling severity	Mental health	South Oaks Gambling Screen-Revised for Adolescents	Sectional
243		Relative deprivation and disordered gambling in youths	Elgar, F. J., Canale, N., Wohl, M. J. A., Lenzi, M., Vieno, A.	2018	Italy	EU	19321	SES; family support	proportional ranks of FAS; Yitzhaki index based on FAS; family support	IV and moderator	Disordered gambling	Mental health	South Oaks Gambling Screen-Revised for Adolescents	Sectional
249		Worries, coping strategies and well-being in adolescence: highlights from HBSC study in Portugal	Matos, M. G. D., Camacho, I., Reis, M., Costa, D., Galvão, D.	2016	Portugual	EU	3869	Family support	Family support	IV	feeling better when facing worries	Mental health	feeling better when facing worries	Sectional
253		What Protects Adolescents with Youth Subculture Affiliation from Excessive Internet Use?	Bobakova, D. F., Holubcikova, J., Geckova, A. M., Veselska, Z. D.	2018	Slovakia	EU	532	SES; Parental monitoring; Family support	Subjective family wealth; Parental monitoring; Family support (subscale of Perceived Social Support Scale)	IV and moderator	Excessive Internet use	Mental health	Excessive Internet Use Scale	Sectional
278		Income Inequality and Adolescent Gambling Severity: Findings from a Large-Scale Italian Representative Survey	Canale, N., Vieno, A., Lenzi, M., Griffiths, M. D., Borraccino, A., Lazzeri, G., Lemma, P., Scacchi, L., Santinello, M.	2017	Italy	EU	20791	Family structure; SES; Family support	Family structure; FAS; Family support	IV	At-risk or problem gambling	Mental health	South Oaks Gambling Screen-Revised for Adolescents	Sectional
126	1	Adolescents' sleep quality in relation to peer, family and school factors: findings from the 2017/2018 HBSC study in Flanders	Delaruelle, K., Dierckens, M., Vandendriessche, A., Deforche, B., Poppe, L.	2021	Belgium Flanders	EU	8153	SES; Family structure; Family support	Parental eduation; subjective family wealth; Household composition; Family support;	IV	sleep quality	Phy health	sleep quality scale	Sectional

## Sheet: SpecialCase
Synthesis of articles including special family psychosocial factors
Family Environment
New ID	Decision	Title	Authors	Publication Year	Country	Area	Sample size	Family Variable	Measurement for family	Family role (IV/Mediator/Moderator)	Children's health outcomes	Measurements for children	Design (Sectional/Trend)	Note
174	1	Protective roles of home and school environments for the health of young Canadians	Freeman, J., King, M., Kuntsche, E., Pickett, W.	2011	Canada	NA	5368	Family environment	Parental understanding; Parental trust; communication with parents; happiness of home life	IV and moderator	psychosomatic symptoms; serious injuries	HBSC Symptom Checklist; serious injuries	Trend	Family environment is a composite concept
Home atmosphere
New ID	Decision	Title	Authors	Publication Year	Country	Area	Sample size	Family Variable	Measurement for family	Family role (IV/Mediator/Moderator)	Children's health outcomes	Measurements for children	Design (Sectional/Trend)	Note
255	1	Empowerment-enabling home and school environments and self-rated health among Finnish adolescents	Simonsen, N., Lahti, A., Suominen, S., Välimaa, R., Tynjälä, J., Roos, E., Kannas, L.	2020	Finland	EU	7802	Home atmosphere; Family support	Home atmosphere; Family support	IV	Self-rated health	Self-rated health	Sectional
Combination
New ID	Decision	Title	Authors	Publication Year	Country	Area	Sample size	Family Variable	Measurement for family	Family role (IV/Mediator/Moderator)	Children's health outcomes	Measurements for children	Design (Sectional/Trend)	Note
246		Impact of negative life events on positive health in a population of adolescents with special needs, and protective factors	Simoes, C., de Matos, M. G., Tome, G., Ferreira, M.	2008	Portugual	EU	494	Family related resilience resource	Caring Relationships; High Expectations; Meaningful Participation	IV and moderator	Global well-being	Global well-being scale	Sectional
256		Testing the theory of holism: A study of family systems and adolescent health	Michaelson, V., Pickett, W., King, N., Davison, C.	2016	Canada	NA	19333	Family meals; Family support; SES	Frequency of family meals; Family support; Subjective family wealth	IV	Physical activity; risk behaviour; life satisfaction; psychosomatic symptoms	Physical activity; risk behaviour (substance use, fighting, bullying and energy drink consumption); life satisfaction; HBSC Symptom Checklist	Sectional

## Sheet: AllFamilyPsySocio
Synthesis of all articles including family psychosocial factors
New ID	Decision	Title	Authors	Publication Year	Country	Area	Sample size	Family Variable	Measurement for family	Family role (IV/Mediator/Moderator)	Children's health outcomes	Measurements for children	Design (Sectional/Trend)	Note
20	1	What role do family composition and functioning play in emotional and behavioural problems among adolescent boys and girls?	Paclikova, K., Dankulincova Veselska, Z., Filakovska Bobakova, D., Palfiova, M., Madarasova Geckova, A.	2019	Slovakia	EU	2908	Family structure; Family support; Family communication; SES	Household composition; Multidimensional Scale of Perceived Social Support; family communication; FAS	IV	Internalizing and externalizing problems	Strengths and Difficulties Questionnaire	Sectional
34	1	Familial determinants of current smoking among adolescents of Lithuania: a cross-sectional survey 2014	Zaborskis, A., Sirvyte, D.	2015	Lithuania	EU	3696	SES; Family structure; Communication with parents; Family communication; Satisfaction with family relationships; Parental monitoring; Parental emotional support; Parental promotion of autonomy; Family time together; School-related parental support; Parenting style; Electronic media communication with parents; Seeing of parents	FAS; Household composition; Communication with parents;Short Version of Family Dynamics Measure II; Satisfaction with family relationships; Parental monitoring; Parental bonding (two-dimension); Joint family activity; School-related parental support; Parental disciplinary styles measurement; Electronic media communication with parents; Seeing of parents	IV	Smoking behaviour	Smoking behaviour	Sectional
51	1	Family Social Environment and Parenting Predictors of Alcohol Use among Adolescents in Lithuania	Sumskas, L., Zaborskis, A.	2017	Lithuania	EU	3715	Family structure; SES; Satisfaction with family relationships; Communication with parents; Parental monitoring; Family communication; school-related parental support; Parental emotional support; Parenting style; Family activity; Electronic media communication with parents; Seeing parents	Household composition; FAS; Satisfaction with family relationships; Communication with parents; Parental monitoring; Quality of communication with family; school-related parental support; Parental emotional support; Parenting style; Family time together; Electronic media communication with parents; Seeing parents	IV	Weekly alcohol use	Weekly alcohol use	Sectional
63	1	Breakfast frequency among adolescents: associations with measures of family functioning	Pedersen, T. P., Holstein, B. E., Damsgaard, M. T., Rasmussen, M.	2016	Denmark	EU	3054	SES; communication with parents; family communication; family support	communication with parents; Quality of family communication; family support; parents' occupational social class; migration status; household composition	IV	Breakfast consumption	Breakfast consumption during weekdays	Sectional
117	1	School, Peer and Family Relationships and Adolescent Substance Use, Subjective Wellbeing and Mental Health Symptoms in Wales: a Cross Sectional Study	Moore, G. F., Cox, R., Evans, R. E., Hallingberg, B., Hawkins, J., Littlecott, H. J., Long, S. J., Murphy, S.	2018	Wales	EU	8009	family support; family communication	family support; family communication	IV and moderator	substance use; subjective wellbeing; mental health symptoms	tobacco use; cannabis use; alcohol use; subjective wellbeing; HBSC-Symptom checklist	Sectional
118	1	Clustering of health-related behaviours and its relationship with individual and contextual factors in Portuguese adolescents: results from a cross-sectional study	dos Santos, C. S., Picoito, J., Loureiro, I., Nunes, C.	2020	Portugual	EU	4036	SES; Family structure;Family communication	FAS; Household composition; communication with parents	IV	Health behaviours	physical activity; eating habit; substance use	Sectional
129	1	Social support and family communication as factors protecting adolescents against multiple recurrent health complaints related to school stress	Tabak, I., Mazur, J.	2016	Poland	EU	4432	SES; Family communication; Family support	FAS;Family Dynamics Measure; Family support	IV	subjective health complaints	HBSC Symptom Checklist	Sectional
142	1	What is worse? A hierarchy of family-related risk factors predicting alcohol use in adolescence	Kuntsche, E. N., Kuendig, H.	2006	Switzerland	EU	3127	Family Structure; Family drinking; Family communication; Family activity; Family support	Family Structure; Perception of excessive drinking in the family; Family communication; Family activity; Family support	IV	alcohol use	Frequency of alcoholic beverage intake; drunkenness	Sectional
152	1	Prevalence and familial predictors of suicidal behaviour among adolescents in Lithuania: a cross-sectional survey 2014	Zaborskis, A., Sirvyte, D., Zemaitiene, N.	2016	Lithuania	EU	2542	SES; Family structure; Family communication; Satisfaction with family relationships; Parental monitoring; Emotional support; School-related parental support; Parenting style; Family activity; Electronic media communication with parents; Seeing the parents	FAS; Household composition; Communication with Parents; Family Dynamics Measure; Satisfaction with family relationships; Parental monitoring; Parental bonding; parental disciplinary styles; Family activities; Electronic media communication with parents; Seeing the parents	IV	Suicide and self-harm	Youth Risk Behaviour Survey	Sectional
180	1	Interpersonal relationships as predictors of positive health among Irish youth: the more the merrier?	Molcho, M., Gabhainn, S. N., Kelleher, C. C.	2007	Ireland	EU	8424	Family communications	Communcation with parents and siblings	IV	physical/emotional symptoms; Life satisfaction; positive life; happiness	HBSC Symptom Checklist; Life satisfaction; Wellbeing scale; General lifer happiness	Sectional
226	1	Social and behavioral predictors of adolescents’ positive attitude towards life and self	Malinowska-Cieślik, M., Mazur, J., Nałęcz, H., Małkowska-Szkutnik, A.	2019	Poland	EU	2939	SES; family communication	FAS; Family Dynamics Measure II	IV	Positive Attitude	Positive Attitude Scale	Sectional
238	1	The role of family and computer-mediated communication in adolescent loneliness	Favotto, L., Michaelson, V., Pickett, W., Davison, C.	2019	Canada	NA	30117	Family communication	Family Dynamics Measure II	moderator	Self-perceived loneliness	Self-perceived loneliness	Sectional
99	1	Psychosocial factors of different health behaviour patterns in adolescents: Association with overweight and weight control behaviours	Veloso, S. M., Matos, M. G., Carvalho, M., Diniz, J. A.	2012	Portugual	EU	3069	satisfaction with family relationships; communication with parents;	satisfaction with family relationships; communication with parents;	IV	Health Behaviours	physical activity; sedentary behaviours	Sectional
112	1	Emotional and Psychosocial Factors Associated With Drunkenness and the Use of Tobacco and Cannabis in Adolescence: Independent or Interactive Effects?	García-Moya, I., Ortiz Barón, M. J., Moreno, C.	2017	Spain	EU	1752	parental emotional support; communication with parents; parental monitoring; satisfaction with family relationships	parental emotional support; communication with parents; parental monitoring; satisfaction with family relationships	IV and moderator	substance use	drunkenness; tobacco use; cannabisuse	Sectional
182	1	Characterization of Resilient Adolescents in the Context of Parental Unemployment	Moreno-Maldonado, C., Jimenez-Iglesias, A., Rivera, F., Moreno, C.	2020	Spain	EU	908	SES; Family structure; Family support; Satisfaction with family relationships	Parental educational level; subjective family wealth; Household composition; Family support; Family satisfaction	IV	Global Health Score	life satisfaction; heath-related quality of life; self-reported health	Sectional
184	1	Adolescent toothbrushing and the home environment: sociodemographic factors, family relationships and mealtime routines and disorganisation	Levin, K. A., Currie, C.	2010	Scotland	EU	6190	Family structure; SES; Satisfaction with family relationships; Family meals	Household composition; number of siblings; have (not) the second home; FAS; Parental employment; Contact with parents; Perceived parenting; Comunication with parents/siblings; Family evening meal	IV	Tooth brushing	Tooth brushing	Sectional
199	1	Factors associated with life satisfaction of adolescents living with employed and unemployed parents in Spain and Portugal: A person focused approach	Moreno-Maldonado, C., Jimenez-Iglesias, A., Camacho, I., Rivera, F., Moreno, C., Matos, M. G.	2020	multiple(N=2)	EU	21081	Satisfaction with family relationships; SES	family satisfaction; Parental employment status	IV	Life satisfaction	Life satisfaction	Sectional
209	1	Life Satisfaction, Physical Activity and Quality of Life Associated with the Health of School-Age Adolescents	Urchaga, J. D., Guevara, R. M., Cabaco, A. S., Moral-Garcia, J. E.	2020	Spain	EU	1226	Satisfaction with family relationships	Family life satisfaction	IV	Sports physical activity; personal life satisfaction; Quality of Life Associated with Health	Sports physical activity; personal life satisfaction; Quality of Life Associated with Health	Sectional
221	1	Suicidal thoughts and depressive feelings amongst Estonian schoolchildren: effect of family relationship and family structure	Samm, A., Tooding, L. M., Sisask, M., Kolves, K., Aasvee, K., Varnik, A.	2010	Estonia	EU	4389	satisfaction with family relationships; communication with parents; family structures; SES	family satisfaction; communication with parents; household composition; family economic deprivation based on FAS	IV	suicidal ideation; depressive feelings	suicidal ideation; depressive feelings	Sectional
239	1	Bullying, family resources, and mental health: A test of the ABC-X theory	Resnick, Elise M.	2014	US	NA	9198	Communication with parents; Seeing parents; Satisfaction with Family Relationships	Communication with parents; Seeing parents; Satisfaction with Family Relationships	IV and moderator	Mental health; Life satisfaction	Mental health; Life satisfaction	Sectional
283		Exploring Sex Differences in the Association between Bullying Involvement and Alcohol and Marijuana Use among US Adolescents in 6(th) to 10(th) Grade	Lee, J., Choi, M. J., Thornberg, R., Hong, J. S.	2020	US	NA	7084	Parental monitoring; parental emotional support; SES; Satisfaction with family relationships	Parental monitoring; parental emotional support; subjective family wealth; Family satisfaction	IV	alcohol use; marijuana use	alcohol use; marijuana use	Sectional
8	1	Individual and social determinants of early sexual activity: A study of gender-based differences using the 2018 Canadian Health Behaviour in School-aged Children Study (HBSC)	Gazendam, N., Cleverley, K., King, N., Pickett, W., Phillips, S. P.	2020	Canada	NA	6154	SES; Family support; Family structure	Subjective family wealth; Family support; Household composition	IV	Early Sexual Activity	Sexual activity	Sectional
52	1	Alcohol consumption in early adolescence: Associations with sociodemographic and psychosocial factors according to gender	Pedroni, C., Dujeu, M., Lebacq, T., Desnouck, V., Holmberg, E., Castetbon, K.	2021	Belgium	EU	4364	Family support; family structure; SES	Multidimensional Scale of Perceived Social Support; Household composition; FAS	IV	Alcohol consumption	Daily alcohol consumption	Sectional
77	1	Connectedness as a protective factor in immigrant youth: results from the Health Behaviours in School-aged Children (HBSC) Italian study	Borraccino, A., Berchialla, P., Dalmasso, P., Sciannameo, V., Vieno, A., Lazzeri, G., Charrier, L., Lemma, P.	2020	Italy	EU	47399	SES; Family support	FAS; Family support	IV	Life satisfaction; Health complaints;	Life satisfaction; HBSC Symptom Checklist	Sectional
101	1	Associations between socioeconomic and family determinants and weight-control behaviours among adolescents	Tur-Sinai, A., Kolobov, T., Tesler, R., Baron-Epel, O., Dvir, K., Harel-Fisch, Y.	2020	Israel	ME	4390	SES; communication with parents; family support; parental monitoring; family meals	FAS; subjective family wealth; communication with parents; family support; parental monitoring; family meal	IV	Weight-control behaviours	Weight-control behaviours	Sectional
126	1	Adolescents' sleep quality in relation to peer, family and school factors: findings from the 2017/2018 HBSC study in Flanders	Delaruelle, K., Dierckens, M., Vandendriessche, A., Deforche, B., Poppe, L.	2021	Belgium Flanders	EU	8153	SES; Family structure; Family support	Parental eduation; subjective family wealth; Household composition; Family support;	IV	sleep quality	sleep quality scale	Sectional
133	1	Physical activity and features of the environment in which school children grow up as low mood determinants	Kleszczewska, D., Siedlecka, J., Mazur, J.	2019	Poland	EU	5195	SES; Family structure;Family support	FAS; Household composition; Family support	IV	general wellbeing;	WHO-5 wellbeing screen test	Sectional
148	1	Mental Health in Adolescents with a Migration Background in 29 European Countries: The Buffering Role of Social Capital	Delaruelle, K., Walsh, S. D., Dierckens, M., Deforche, B., Kern, M. R., Currie, C., Maldonado, C. M., Cosma, A., Stevens, G. W. J. M.	2021	multiple(N=29)	EU	121751	Immigrant status; Family support	Immigrant status; Family support	IV and moderator	Mental health	Life dissatisfaction; HBSC Symptoms Checklist	Sectional
172	1	Self-harm in adolescence: protective health assets in the family, school and community	Klemera, E., Brooks, F. M., Chester, K. L., Magnusson, J., Spencer, N.	2017	England	EU	1521	Communication with parents; family activity; Parental promotion of autonomy; Family support	Communication with parents; family activites; Personal autonomy in relation to family; Family support	IV	Self-harm	Self-harm	Sectional
185	1	Sexual behaviour in 15-year-old adolescents: Insights into the role of family, peer, teacher, and classmate support	Borraccino, A., Lo Moro, G., Dalmasso, P., Nardone, P., Donati, S., Berchialla, P., Charrier, L., Lenzi, M., Spinelli, A., Lemma, P.	2020	Italy	EU	18918	Family structure; family support	Household composition; Family support	IV	Early sexual intercourse	Sexual intercourse	Sectional
215	1	Life Satisfaction in Adolescents: The Role of Individual and Social Health Assets	Calmeiro, L., Camacho, I., de Matos, M. G.	2018	Portugual	EU	3494	Family support; Parental monitoring	Family support; Parental monitoring	IV	Life Satisfaction	Life Satisfaction	Sectional
222	1	The Prevalence and Predictors of Suicidal Ideation Among Slovene Adolescents	Bračič, M., Roškar, S., Zager Kocjan, G., Jeriček Klanšček, H.	2019	Slovenia	EU	1547	Family support	family support	IV	suicidal ideation	suicidal ideation	Sectional
240	1	A large-scale national study of gambling severity among immigrant and non-immigrant adolescents: The role of the family	Canale, N., Vieno, A., Griffiths, M. D., Borraccino, A., Lazzeri, G., Charrier, L., Lemma, P., Dalmasso, P., Santinello, M.	2017	Italy	EU	1158	Immigrant status; Family structure; SES; Family support	Immigrant status; Biological/adoptive parents; FAS; Family support	IV and moderator	Problem gambling severity	South Oaks Gambling Screen-Revised for Adolescents	Sectional
243		Relative deprivation and disordered gambling in youths	Elgar, F. J., Canale, N., Wohl, M. J. A., Lenzi, M., Vieno, A.	2018	Italy	EU	19321	SES; family support	proportional ranks of FAS; Yitzhaki index based on FAS; family support	IV and moderator	Disordered gambling	South Oaks Gambling Screen-Revised for Adolescents	Sectional
249		Worries, coping strategies and well-being in adolescence: highlights from HBSC study in Portugal	Matos, M. G. D., Camacho, I., Reis, M., Costa, D., Galvão, D.	2016	Portugual	EU	3869	Family support	Family support	IV	feeling better when facing worries	feeling better when facing worries	Sectional
253		What Protects Adolescents with Youth Subculture Affiliation from Excessive Internet Use?	Bobakova, D. F., Holubcikova, J., Geckova, A. M., Veselska, Z. D.	2018	Slovakia	EU	532	SES; Parental monitoring; Family support	Subjective family wealth; Parental monitoring; Family support (subscale of Perceived Social Support Scale)	IV and moderator	Excessive Internet use	Excessive Internet Use Scale	Sectional
255		Empowerment-enabling home and school environments and self-rated health among Finnish adolescents	Simonsen, N., Lahti, A., Suominen, S., Välimaa, R., Tynjälä, J., Roos, E., Kannas, L.	2020	Finland	EU	7802	Home atmosphere; Family support	Home atmosphere; Family support	IV	Self-rated health	Self-rated health	Sectional
256		Testing the theory of holism: A study of family systems and adolescent health	Michaelson, V., Pickett, W., King, N., Davison, C.	2016	Canada	NA	19333	Family meals; Family support; SES	Frequency of family meals; Family support; Subjective family wealth	IV	Physical activity; risk behaviour; life satisfaction; psychosomatic symptoms	Physical activity; risk behaviour (substance use, fighting, bullying and energy drink consumption); life satisfaction; HBSC Symptom Checklist	Sectional
258		The sources of support and their relation on the global health of adopted and non-adopted adolescents	Paniagua, C., Moreno, C., Rivera, F., Ramos, P.	2019	Spain	EU	28768	Family support	Family support	IV	Global Health Score	Life satisfaction; Self-reported health; Health-related quality of life (Kidscreen-10); Psychosomatic complaints (HBSC Symptom Checklist)	Sectional
268		Social support from developmental contexts and adolescent substance use and well-being: A comparative study of Spain and Portugal	Jiménez-Iglesias, A., Camacho, I., Rivera, F., Moreno, C., De Matos, M. G.	2017	multiple(N=2)	EU	28394	Family support	Family support	IV	Substance Use; wellbeing	Life satisfaction; Health-related quality of life(KIDSCREEN-10)	Sectional
278		Income Inequality and Adolescent Gambling Severity: Findings from a Large-Scale Italian Representative Survey	Canale, N., Vieno, A., Lenzi, M., Griffiths, M. D., Borraccino, A., Lazzeri, G., Lemma, P., Scacchi, L., Santinello, M.	2017	Italy	EU	20791	Family structure; SES; Family support	Family structure; FAS; Family support	IV	At-risk or problem gambling	South Oaks Gambling Screen-Revised for Adolescents	Sectional
174	1	Protective roles of home and school environments for the health of young Canadians	Freeman, J., King, M., Kuntsche, E., Pickett, W.	2011	Canada	NA	5368	Family environment	Parental understanding; Parental trust; communication with parents; happiness of home life	IV and moderator	psychosomatic symptoms; serious injuries	HBSC Symptom Checklist; serious injuries	Trend	Family environment is a composite concept
255	1	Empowerment-enabling home and school environments and self-rated health among Finnish adolescents	Simonsen, N., Lahti, A., Suominen, S., Välimaa, R., Tynjälä, J., Roos, E., Kannas, L.	2020	Finland	EU	7802	Home atmosphere; Family support	Home atmosphere; Family support	IV	Self-rated health	Self-rated health	Sectional
246		Impact of negative life events on positive health in a population of adolescents with special needs, and protective factors	Simoes, C., de Matos, M. G., Tome, G., Ferreira, M.	2008	Portugual	EU	494	Family related resilience resource	Caring Relationships; High Expectations; Meaningful Participation	IV and moderator	Global well-being	Global well-being scale	Sectional
