# Supplementary material for: Family Related Variables’ Influences on Adolescents’ Health Based on Health Behaviour in School-Aged Children Database, an AI-Assisted Scoping Review, and Narrative Synthesis
Source: Front Psychol. 2022 Aug 10;13:871795. doi: 10.3389/fpsyg.2022.871795 (PMC9400839; doi:10.3389/fpsyg.2022.871795)
Supplement: Supplementary file 10 [file Table_9.XLSX]

## Sheet: CommunicationParents
Synthesis of articles measuring the adolescent-parent communications
New ID	Decision	Title	Authors	Publication Year	Country	Area	Sample size	Family Variable	Measurement for family	Family role (IV/Mediator/Moderator)	Children's health outcomes	Measurements for children	Design (Sectional/Trend)	Note
1	1	Smoking in young people with asthma	Hublet, A., De Bacquer, D., Boyce, W., Godeau, E., Schmid, H., Vereecken, C., De Baets, F., Maes, L.	2007	multiple (N=6)	EU+NA	9735	Communication with parents; Parental smoking	Communication with parents; Parental smoking	IV	Smoking	Daily smoking	Sectional
3	1	Parental, peer and school experiences as predictors of alcohol drinking among first and second generation immigrant adolescents in Israel	Walsh, S. D., Djalovski, A., Boniel-Nissim, M., Harel-Fisch, Y.	2014	Israel	ME	3059	SES; Communication with parents; Parental monitoring	FAS; Communication with parents; Parental monitoring	IV	Alcohol drinking	Casual drinking; Drunkenness; Binge drinking	Sectional
9	1	Health outcomes among Swedish children: The role of social capital in the family, school and neighbourhood	Eriksson, U., Hochwälder, J., Carlsund, A., Sellström, E.	2012	Sweden	EU	3926	Communication with parents	Communication with parents	IV	Subjective health complaints; Subjective well-being	HBSC Symptoms Checklist; Subjective well-being scale	Sectional
10	1	Does family communication moderate the association between adverse childhood experiences and emotional and behavioural problems?	Lackova Rebicova, M., Dankulincova Veselska, Z., Husarova, D., Klein, D., Madarasova Geckova, A., Van Dijk, J. P., Reijneveld, S. A.	2020	Slovakia	EU	5202	Communication with parents	Communication with mother; Communication with father	IV and moderator	Internalizing and externalizing problems	Strengths and Difficulties Questionnaire	Sectional	communication mod
32	1	Associations of behavioural, psychosocial and socioeconomic factors with over- and underweight among German adolescents	Mikolajczyk, R. T., Richter, M.	2008	Germany	EU	5650	Family structure; SES; communication with parents	Household composition; Parents’ occupational social class ; FAS; communication with parents	IV	Underweight/overweight	BMI	Sectional	SES had two indicators: FAS and parents' OSC
34	1	Familial determinants of current smoking among adolescents of Lithuania: a cross-sectional survey 2014	Zaborskis, A., Sirvyte, D.	2015	Lithuania	EU	3696	SES; Family structure; Communication with parents; Family communication; Satisfaction with family relationships; Parental monitoring; Parental emotional support; Parental promotion of autonomy; Family time together; School-related parental support; Parenting style; Electronic media communication with parents; Seeing of parents	FAS; Household composition; Communication with parents;Short Version of Family Dynamics Measure II; Satisfaction with family relationships; Parental monitoring; Parental bonding (two-dimension); Joint family activity; School-related parental support; Parental disciplinary styles measurement; Electronic media communication with parents; Seeing of parents	IV	Smoking behaviour	Smoking behaviour	Sectional
37	1	Socioeconomic inequalities in adolescent smoking across 35 countries: A multilevel analysis of the role of family, school and peers	Moor, I., Rathmann, K., Lenzi, M., Pförtner, T. K., Nagelhout, G. E., De Looze, M., Bendtsen, P., Willemsen, M., Kannas, L., Kunst, A. E., Richter, M.	2015	multiple(N=35)	Global	52907	SES; Communication with parents; Family structure	FAS; Communication with parents; Household composition	IV	Tobacco smoking	Weekly smoking	Sectional
51	1	Family Social Environment and Parenting Predictors of Alcohol Use among Adolescents in Lithuania	Sumskas, L., Zaborskis, A.	2017	Lithuania	EU	3715	Family structure; SES; Satisfaction with family relationships; Communication with parents; Parental monitoring; Family communication; school-related parental support; Parental emotional support; Parenting style; Family activity; Electronic media communication with parents; Seeing parents	Household composition; FAS; Satisfaction with family relationships; Communication with parents; Parental monitoring; Quality of communication with family; school-related parental support; Parental emotional support; Parenting style; Family time together; Electronic media communication with parents; Seeing parents	IV	Weekly alcohol use	Weekly alcohol use	Sectional
53	1	Adolescents’ drinking and drunkenness more likely in one-parent families and due to poor communication with mother	Tomčíková, Z., Dankulincová Veselská, Z., Madarasová Gecková, A., van Dijk, J. P., Reijneveld, S. A.	2015	Slovakia	EU	3882	Communication with Parents; Family Composition	Communication with Parents; Household composition	IV	Frequent Alcohol Drinking; Lifetime Drunkenness	Frequency of alcohol drinking; Lifetime Drunkenness	Sectional
56	1	Greenlandic family structure and communication with parents: influence on schoolchildren's drinking behaviour	del Carmen, M., Alcón, G., Pedersen, J. M., María, A., González, C.	2002	Greenland	EU	1648	SES; Family structure; communication with parents	parents' occupational level; Household composition; communication with parents	IV	Alcohol consumption	Alcohol consumption	Sectional
58	1	EXPERIENCE OF CZECH CHILDREN WITH ALCOHOL CONSUMPTION IN RELATION TO SELECTED FAMILY INDICATORS	Hodacova, L., Smejkalova, J., Cermakova, E., Kalman, M.	2017	Czech	EU	4293	Family structure; family activity; communication with parents	Household composition; time with family; communication with parents	IV	alcohol consumption; experience of drunkenness	alcohol consumption; experience of drunkenness	Sectional
62	1	Psychosocial and behavioural factors in the explanation of socioeconomic inequalities in adolescent health: a multilevel analysis in 28 European and North American countries	Moor, I., Rathmann, K., Stronks, K., Levin, K., Spallek, J., Richter, M.	2014	multiple(N=28)	EU+NA	117460	SES; communication with parents	FAS; communication with parents	IV	Self-rated health	Self-rated health	Sectional
63	1	Breakfast frequency among adolescents: associations with measures of family functioning	Pedersen, T. P., Holstein, B. E., Damsgaard, M. T., Rasmussen, M.	2016	Denmark	EU	3054	SES; communication with parents; family communication; family support	communication with parents; Quality of family communication; family support; parents' occupational social class; migration status; household composition	IV	Breakfast consumption	Breakfast consumption during weekdays	Sectional
76	1	Family, School and Health in Children and Adolescents Findings from the 2006 HBSC Study in Greece	Karademas, E. C., Peppa, N., Fotiou, A., Kokkevi, A.	2008	Greece	EU	3034	communication with parents; Parental monitoring; parental emotional support	communication with parents; Parental monitoring; parental emotional support	IV	Subjective health and well-being	self-rated health; satisfaction; HBSC Symptom Checklist with life	Sectional
82	1	Socio-economic position and adolescents' health in Italy: the role of the quality of social relations	Zambon, A., Lemma, P., Borraccino, A., Dalmasso, P., Cavallo, F.	2006	Italy	EU	4386	SES; Communication with parents	FAS; communication with parents	IV	health behaviours	smoking; alcohol use; frequency of physical activity; cannabis use.	Sectional
85	1	Close relations to parents and emotional symptoms among adolescents: beyond socio-economic impact?	Damsgaard, M. T., Holstein, B. E., Koushede, V., Madsen, K. R., Meilstrup, C., Nelausen, M. K., Nielsen, L., Rayce, S. B.	2014	Denmark	EU	15646	Communication with parents; SES	Communication with parents; parents' occupational class	IV and moderator	Emotional symptoms	HBSC Symptom Check List	Sectional	Relationship - IV; SES - moderator
94	1	Adolescent Weight Status: Associations With Structural and Functional Dimensions of Social Relations	Kjelgaard, H. H., Holstein, B. E., Due, P., Brixval, C. S., Rasmussen, M.	2017	Denmark	EU	4922	communication with parents	communication with parents	IV	overweight	BMI	Sectional
96	1	The relationship between body mass index and unhealthy weight control behaviors among adolescents: The role of family and peer social support	Vander Wal, J. S.	2012	US	NA	4598	communication with parents; school-related parental support; Communication with siblings	communication with parents; school-related parental support; Communication with siblings	IV	Unhealthy weight control behaviors;Possible disordered eating behavior	Unhealthy weight control behaviors;Possible disordered eating behavior	Sectional
99	1	Psychosocial factors of different health behaviour patterns in adolescents: Association with overweight and weight control behaviours	Veloso, S. M., Matos, M. G., Carvalho, M., Diniz, J. A.	2012	Portugual	EU	3069	satisfaction with family relationships; communication with parents;	satisfaction with family relationships; communication with parents;	IV	Health Behaviours	physical activity; sedentary behaviours	Sectional
100	1	Gender-specific substance use patterns and associations with individual, family, peer, and school factors in 15-year-old Portuguese adolescents: A latent class regression analysis	Picoito, J., Santos, C., Loureiro, I., Aguiar, P., Nunes, C.	2019	Portugual	EU	1553	SES; family structure; communication with parents	FAS; household compostion; communication with parents	IV	use of alcohol, tobacco; drunkenness	use of alcohol, tobacco; drunkenness	Sectional
101	1	Associations between socioeconomic and family determinants and weight-control behaviours among adolescents	Tur-Sinai, A., Kolobov, T., Tesler, R., Baron-Epel, O., Dvir, K., Harel-Fisch, Y.	2020	Israel	ME	4390	SES; communication with parents; family support; parental monitoring; family meals	FAS; subjective family wealth; communication with parents; family support; parental monitoring; family meal	IV	Weight-control behaviours	Weight-control behaviours	Sectional
102	1	Individual and environmental predictors of health risk behaviours among Dutch adolescents: The HBSC study	Harakeh, Z., De Looze, M. E., Schrijvers, C. T. M., van Dorsselaer, S. A. F. M., Vollebergh, W. A. M.	2012	Netherlands	EU	1742	SES; communication with parents; parental monitoring; alcohol drinking-related parental rules	FAS; communication with parents; mother's monitoring; Parental rules on alcohol drinking	IV	Health risk behaviour	Tobacco smoking; binge drinking; cannabis smoking; early sexual intercours	Sectional
104	1	Parent-child communication and substance use among adolescents: Do father and mother communication play a different role for sons and daughters?	Luk, J. W., Farhat, T., Iannotti, R. J., Simons-Morton, B. G.	2010	US	NA	1308	Communication with parents	Communication with mother; Communication with father	IV	Substance Use	cigarette smoking; alcohol drinking	Sectional
106	1	The Associations between Family-Related Factors and Excessive Internet Use in Adolescents	Faltynkova, A., Blinka, L., Sevcikova, A., Husarova, D.	2020	Slovakia	EU	2547	SES; family structure; parental emotional support; Parental promotion of autonomy; Parental monitoring ; Family activity; communication with parents	Subjective family wealth; Household compostion; Parental Bonding Instrument; Parental monitoring; Family activities; communication with parents	IV	Excessive Internet Use	Excessive Internet Use scale	Sectional
110	1	Family Structure and Adolescent Substance Use: An International Perspective	Hoffmann, J. P.	2017	multiple(N=37)	Global	193202	SES; family structure; communication with parents	FAS; Household composition; communication with parents	IV and mediator	substance use	cigarette/alcohol/cannabis use	Sectional
115	1	Adolescent substance abuse, the importance of family, school and peers: data from the health behaviour in school children	Jovic-Vranes, A. S., Vranes, B., Marinkovic, J., Cucic, V.	2005	Serbia	EU	1540	Family structure; communication with parents	Household composition; communication with parents	IV	Substance Use	alcohol consumption; drug use;	Sectional
123	1	Parents, teachers and peer relations as predictors of risk behaviors and mental well-being among immigrant and Israeli born adolescents	Walsh, S. D., Harel-Fisch, Y., Fogel-Grinvald, H.	2010	Ireland	EU	7866	Immigrant status; Communication with parents; Family activity; Parental monitoring; School-related parental support	Immigrant status; Communication with parents; Family activity; Parental monitoring; School-related parental support	IV and moderator	Health risk behaviours; Wellbeing	Smoking; Drinking; HBSC Symptoms Checklist	Sectional	Immigrant status -- moderator; Relationship with parents --IV
125	1	Cross-national evidence for the clustering and psychosocial correlates of adolescent risk behaviours in 27 countries	de Looze, M., ter Bogt, T. F. M., Raaijmakers, Q. A. W., Pickett, W., Kuntsche, E., Vollebergh, W. A. M.	2015	multiple(N=27)	EU+NA	56090	Communication with parents	Communication with parents	IV	Health risk behaviours	substance use; sexual activity	Sectional
127	1	Substance use in Portuguese and Spanish adolescents: Highlights from differences, similarities and moderating effects	Simões, C., Matos, M. G., Moreno, C., Rivera, F., Batista-Foguet, J. M., Simons-Morton, B.	2012	multiple(N=2)	EU	5780	Communication with parents	Communication with parents	IV	Substance Use	tobacco/alcohol/cannabis use	Sectional
130	1	Parent, school, and peer factors related to US adolescents' diet and exercise	Chung, S. J., Ersig, A. L., McCarthy, A. M.	2018	US	NA	5248	Family structure; communication with parents; parental monitoring	Household composition; communication with parents; parental monitoring	IV	Eating behaviour	breakfast and soft drink consumption	Sectional
131	1	Investigating Cannabis Use Normalization by Distinguishing Between Experimental and Regular Use: A Multilevel Study in 31 Countries	Sznitman, S. R., Kolobov, T., ter Bogt, T., Kuntsche, E., Walsh, S. D., Harel-Fisch, Y.	2015	multiple(N=31)	Global	62009	communication with parents	communication with parents	IV	Cannabis use	Cannabis use	Sectional
135	1	Portuguese Adolescents: the Importance of Parents and Peer Groups in Positive Health	Tome, G., de Matos, M. G., Camacho, I., Simoes, C., Diniz, J. A.	2012	Portugual	EU	3636	Communication with Parents	Communication with Parents	IV and moderator	subjective health complaints	HBSC Symptom Checklist	Sectional	Family moderated peer communication effects
140	1	The role of individual and macro-level social determinants on young adolescents' psychosomatic complaints	Ottova, V., Erhart, M., Vollebergh, W., Kökönyei, G., Morgan, A., Gobina, I., Jericek, H., Cavallo, F., Välimaa, R., de Matos, M. G., Gaspar, T., Schnohr, C. W., Ravens-Sieberer, U.	2012	multiple(N=34)	EU	98773	communication with parents; family structure; SES	communication with parents; family structure; FAS	IV	Psychosomatic complaints	HBSC symptom checklist	Sectional
147	1	Peer, family integration and other determinants of cannabis use among teenagers	Kohn, L., Kittel, F., Piette, D.	2004	Belgium French	EU	744	Communication with parents; SES	Communication with parents; number of subjects contributing to family income	IV	Substance Use	Tobacco/alcohol/drug use	Sectional
152	1	Prevalence and familial predictors of suicidal behaviour among adolescents in Lithuania: a cross-sectional survey 2014	Zaborskis, A., Sirvyte, D., Zemaitiene, N.	2016	Lithuania	EU	2542	SES; Family structure; Family communication; Satisfaction with family relationships; Parental monitoring; Emotional support; School-related parental support; Parenting style; Family activity; Electronic media communication with parents; Seeing the parents	FAS; Household composition; Communication with Parents; Family Dynamics Measure; Satisfaction with family relationships; Parental monitoring; Parental bonding; parental disciplinary styles; Family activities; Electronic media communication with parents; Seeing the parents	IV	Suicide and self-harm	Youth Risk Behaviour Survey	Sectional
168	1	Irregular breakfast consumption in adolescence and the family environment: Underlying causes by family structure	Levin, K. A., Kirby, J.	2012	Scotland	EU	16406	Family structure; SES; Seeing parents; Perceived parenting; Communication with parents; Communication with siblings	Household composition; FAS; Contact with parents; Perceived parenting; Communication with parents; Communication with siblings	IV and moderator	Irregular breakfast consumption	Daily breakfast consumption	Sectional	Family structure was a moderator
171	1	Family structure and children's living conditions. A comparative study of 24 countries	Låftman, S. B.	2010	multiple(N=24)	Global	90808	Family structure; communication with parents	Household composition; communication with parents	IV	Health complaints; self-rated health	HBSC Symptom Checklist; self-rated health	Sectional
172	1	Self-harm in adolescence: protective health assets in the family, school and community	Klemera, E., Brooks, F. M., Chester, K. L., Magnusson, J., Spencer, N.	2017	England	EU	1521	Communication with parents; family activity; Parental promotion of autonomy; Family support	Communication with parents; family activites; Personal autonomy in relation to family; Family support	IV	Self-harm	Self-harm	Sectional
177	1	Influence on self-rated health of socio-demographic, lifestyle and affluence factors: an analysis of the Irish and International Health Behaviours Among School-Aged Children (HBSC) datasets 1998	Kelleher, C. C., Tay, J., Gabhainn, S. N.	2007	Ireland and Global(N=15)	Ireland and Global	115327	SES; Communication with parents	FAS; Communication with parents	IV	self rated health	self rated health	Sectional
187	1	Suicidal Ideation, Risk Factors, and Communication With Parents An HBSC Study on School Children in Estonia, Lithuania, and Luxembourg	Mark, L., Samm, A., Tooding, L. M., Sisask, M., Aasvee, K., Zaborskis, A., Zemaitiene, N., Varnik, A.	2013	multiple(N=3)	EU	4954	Communication with Parents	Communication with Parents	IV	suicidal ideation	suicidal ideation	Sectional
195	1	Parent-Child Relationships and Adolescents' Life Satisfaction Across the First Decade of the New Millennium	Jimenez-Iglesias, A., Garcia-Moya, I., Moreno, C.	2017	Spain	EU	46593	Parental emotional support; Communication with parents; Parental monitoring; family activity	Parental Bonding Instrument–Brief Current form ; Communication with parents; Parental monitoring; family activities	IV	Life satisfaction	Life satisfaction	Trend
198	1	The Association Between Adolescent Life Satisfaction, Family Structure, Family Affluence and Gender Differences in Parent-Child Communication	Levin, K. A., Dallago, L., Currie, C.	2012	Scotland	EU	5126	Family structure; SES; communication with parents		IV and moderator	Life Satisfaction	Life Satisfaction	Sectional	interaction term between family structure and parent–child communication
200	1	Shared physical custody after family split-up: implications for health and well-being in Swedish schoolchildren	Carlsund, A., Eriksson, U., Sellstrom, E.	2013	Sweden	EU	10286	Family structure; communication with parents	Household composition; communication with parents	IV	subjective health complaints; subjective wellbeing	HBSC Symptom Checklist; Wellbeing scale	Sectional
201	1	Risk behaviour in Swedish adolescents: is shared physical custody after divorce a risk or a protective factor?	Carlsund, A., Eriksson, U., Lofstedt, P., Sellstrom, E.	2013	Sweden	EU	3699	SES; Immigrant status; Communication with parents; Family structure	Parental employment; subjective family wealth; Immigrant status; Communication with parents; Household composition	IV	Smoking; Drinking; Sexual debut; Conduct problems	Smoking; Drinking; Sexual debut; Strengths and Difficulties Questionnaire	Sectional
202	1	Analysis of the importance of family in the development of sense of coherence during adolescence	García Moya, I., Moreno, C., Jiménez Iglesias, A., Rivera, F., Lindström, B.	2012	Spain	EU	7580	SES; parental emonitional support ; Parental monitoring; Communication with parents; Satisfaction with relationship between parents; Family activity	Family affluence; Parental Bonding Instrument ; Parental monitoring; Communication with parents; Quality of the relationship between parents; Frequency of family activities	IV	Sense of Coherence	Sense of coherence scale	Sectional
211	1	Prevalence of emergency contraceptive pill use among Spanish adolescent girls and their family and psychological profiles	Jimenez-Iglesias, A., Moreno, C., Garcia-Moya, I., Rivera, F.	2018	Spain	EU	1735	Parental monitoring; Communication with parents	Parental monitoring; Communication with parents	IV	emergency contraceptive pill	emergency contraceptive pill	Sectional
218	1	Associations between life contexts and early sexual initiation among young women in France	Jovic, Sonia, Delpierre, Cyrille, Ehlinger, Virginie, Sentenac, Mariane, Young, Honor, Arnaud, Catherine, Godeau, Emmanuelle	2014	France	EU	1094	Family structure; communication with parents; parental bonding; parental monitoring	Household compositionl;communication with parents; bonding; parental monitoring	IV	Early sexual initiation	Early sexual initiation	Sectional
220	1	Trends over Time in Adolescent Emotional Wellbeing in the Netherlands, 2005-2017: Links with Perceived Schoolwork Pressure, Parent-Adolescent Communication and Bullying Victimization	De Looze, M. E., Cosma, A. P., Vollebergh, W. A. M., Duinhof, E. L., de Roos, S. A., van Dorsselaer, S., van Bon-Martens, M. J. H., Vonk, R., Stevens, G. W. J. M.	2020	Netherlands	EU	21901	Communication with parents	Communication with parents	IV	Emotional symptoms; Psychosomatic complaints; Life satisfaction	Strengths and Difficulties Questionnaire; HBSC Symptom Checklist; Life satisfaction	Sectional
221	1	Suicidal thoughts and depressive feelings amongst Estonian schoolchildren: effect of family relationship and family structure	Samm, A., Tooding, L. M., Sisask, M., Kolves, K., Aasvee, K., Varnik, A.	2010	Estonia	EU	4389	satisfaction with family relationships; communication with parents; family structures; SES	family satisfaction; communication with parents; household composition; family economic deprivation based on FAS	IV	suicidal ideation; depressive feelings	suicidal ideation; depressive feelings	Sectional
224	1	Weight concerns among adolescent boys	Kelly, C., Fitzgerald, A., Sentenac, M., Gakewski, J., Molcho, M., Nic Gabhainn, S.	2016	Ireland	EU	6187	Family meals; Communication with parents; SES; Family structure	Breakfast with family; Communication with parents; Maternal employment; Family structure	IV	Weight concerns	Weight concerns	Sectional
234	1	Multiple risk behaviors and suicidal ideation and behavior among Israeli and Palestinian adolescents	Harel-Fisch, Y., Abdeen, Z., Walsh, S. D., Radwan, Q., Fogel-Grinvald, H.	2012	Israel	ME	8345	communication with parents	communication with parents	IV	Suicidal ideation and behavior	Suicidal ideation and behavior	Sectional
237	1	Socialization instances linked to cannabis experimentation among French teenagers	Jovic, S., Genolini, C., Delpierre, C., Spilka, S., Ehlinger, V., Ross, J., Arnaud, C., Godeau, E.	2014	France	EU	4175	SES; Family structure;Communication with parents; Parental monitoring	Parents’ occupational social class; FAS; Household composition; Communication with parents; Parental monitoring	IV	Cannabis Experimentation	cannabis consumption	Sectional
239	1	Bullying, family resources, and mental health: A test of the ABC-X theory	Resnick, Elise M.	2014	US	NA	9198	Communication with parents; Seeing parents; Satisfaction with Family Relationships	Communication with parents; Seeing parents; Satisfaction with Family Relationships	IV and moderator	Mental health; Life satisfaction	Mental health; Life satisfaction	Sectional	all family factors are mod
241		The Happiest Kids on Earth. Gender Equality and Adolescent Life Satisfaction in Europe and North America	de Looze, M. E., Huijts, T., Stevens, G. W. J. M., Torsheim, T., Vollebergh, W. A. M.	2018	multiple(N=34)	EU+NA	171528	SES; Family structure; Communication with parents	Rank of FAS; Family structure; Communication with parents	IV	Life satisfaction	Life satisfaction	Sectional
242		Ethnic differences in youth well-being: The role of sociodemographic background and social support	Runarsdottir, E. M., Vilhjalmsson, R.	2015	Iceland	EU	11435	SES; Family structure; Communication with parents	FAS; Parental employment; Household compostion; Communication with parents	IV	Life satisfaction; Subjective psychosomatic complaints	Life satisfaction; HBSC symptom Checklist	Sectional
244		Supportive communication with parents moderates the negative effects of electronic media use on life satisfaction during adolescence	Boniel-Nissim, M., Tabak, I., Mazur, J., Borraccino, A., Brooks, F., Gommans, R., van der Sluijs, W., Zsiros, E., Craig, W., Harel-Fisch, Y., Finne, E.	2015	multiple(N=9)	EU+NA	53973	SES; Family structure; Communication with parents	FAS; Family structure; Communication with parents;	IV and moderator	Life satisfaction	Life satisfaction	Sectional	FAS, Family structure--IV; Communication with parents-- moderator
248		Sustaining a positive body image in adolescence: an assets-based analysis	Fenton, C., Brooks, F., Spencer, N. H., Morgan, A.	2010	England	EU	6425	SES; Family structure; Communication with parents	FAS; Household composition; Communication with parents	IV	Body image	Body image	Sectional
260		Exploring Whether Talking With Parents, Siblings, and Friends Moderates the Association Between Peer Victimization and Adverse Psychosocial Outcomes	Hong, J. S., Zhang, S., Gonzalez-Prendes, A. A., Albdour, M.	2020	US	NA	12642	Family structure; SES; communication with parents; communication with siblings	Family structure; subjective family wealth; communication with parents; communication with siblings	IV and moderator	alcohol/tobacco use; delinquent friend affiliation; internalizing problems	alcohol/tobacco use; delinquent friend affiliation; HBSC Symptom Checklist	Sectional	Interaction ParentCommunication*peer
272		Substance Use Across Adolescence: Do Gender and Age Matter?	Simoes, C., Matos, M. G., Batista-Foguet, J. M., Simons-Morton, B.	2014	Portugual	EU	12881	Communication with parents	Communication with parents	IV	Substance Use	Tobacco/alcohol/drug use	Sectional
273		Body weight dissatisfaction and communication with parents among adolescents in 24 countries: international cross-sectional survey	Al Sabbah, H., Vereecken, C. A., Elgar, F. J., Nansel, T., Aasvee, K., Abdeen, Z., Ojala, K., Ahluwalia, N., Maes, L.	2009	multiple(N=24)	EU+NA	160000	Communication with parents	Communication with parents	IV	Body Weight Dissatisfaction	Body Weight Dissatisfaction	Sectional
275		Communication in single- and two-parent families and their influence on Portuguese and Spanish adolescents’ life satisfaction	Camacho, I., Jiménez-Iglesias, A., Rivera, F., Moreno, C., Gaspar de Matos, M.	2020	multiple(N=2)	EU	24070	Family structure; communication with parents	Household composition; communication with parents	IV and moderator	Life satisfaction	Life satisfaction	Sectional	Family structure was a moderator, communication was a IV
285		Multiple risk behavior and injury: An international analysis of young people	Pickett, W., Schmid, H., Boyce, W. F., Simpson, K., Scheidt, P. C., Mazur, J., Molcho, M., King, M. A., Godeau, E., Overpeck, M., Aszmann, A., Szabo, M., Harel, Y.	2002	multiple(N=12)	Global	49461	Communication with parents	Communication with parents	IV	Injury	Injury	Sectional

## Sheet: ParentalMonitoring
Synthesis of articles measuring parental monitoring
New ID	Decision	Title	Authors	Publication Year	Country	Area	Sample size	Family Variable	Measurement for family	Family role (IV/Mediator/Moderator)	Children's health outcomes	Measurements for children	Design (Sectional/Trend)	Note
2	1	Parental knowledge and adolescent adjustment: Substance use and health-related quality of life	Jiménez-Iglesias, A., Moreno, C., Carmen Granado-Alcón, M., López, A.	2012	Spain	EU	15942	Parental monitoring; parental emotional support; Sources of parental knowledge	Perceived parental knowledge scale; Parental Bonding Inventory-Brief Current; Sources of parental knowledge	IV	Substance use; Health-related quality of life	Tobacco/Alcohol/Cannabis use frequency; KIDSCREEN-10 index questionnaire	Sectional
3	1	Parental, peer and school experiences as predictors of alcohol drinking among first and second generation immigrant adolescents in Israel	Walsh, S. D., Djalovski, A., Boniel-Nissim, M., Harel-Fisch, Y.	2014	Israel	ME	3059	SES; Communication with parents; Parental monitoring	FAS; Communication with parents; Parental monitoring	IV	Alcohol drinking	Casual drinking; Drunkenness; Binge drinking	Sectional
34	1	Familial determinants of current smoking among adolescents of Lithuania: a cross-sectional survey 2014	Zaborskis, A., Sirvyte, D.	2015	Lithuania	EU	3696	SES; Family structure; Communication with parents; Family communication; Satisfaction with family relationships; Parental monitoring; Parental emotional support; Parental promotion of autonomy; Family time together; School-related parental support; Parenting style; Electronic media communication with parents; Seeing of parents	FAS; Household composition; Communication with parents;Short Version of Family Dynamics Measure II; Satisfaction with family relationships; Parental monitoring; Parental bonding (two-dimension); Joint family activity; School-related parental support; Parental disciplinary styles measurement; Electronic media communication with parents; Seeing of parents	IV	Smoking behaviour	Smoking behaviour	Sectional
51	1	Family Social Environment and Parenting Predictors of Alcohol Use among Adolescents in Lithuania	Sumskas, L., Zaborskis, A.	2017	Lithuania	EU	3715	Family structure; SES; Satisfaction with family relationships; Communication with parents; Parental monitoring; Family communication; school-related parental support; Parental emotional support; Parenting style; Family activity; Electronic media communication with parents; Seeing parents	Household composition; FAS; Satisfaction with family relationships; Communication with parents; Parental monitoring; Quality of communication with family; school-related parental support; Parental emotional support; Parenting style; Family time together; Electronic media communication with parents; Seeing parents	IV	Weekly alcohol use	Weekly alcohol use	Sectional
76	1	Family, School and Health in Children and Adolescents Findings from the 2006 HBSC Study in Greece	Karademas, E. C., Peppa, N., Fotiou, A., Kokkevi, A.	2008	Greece	EU	3034	communication with parents; Parental monitoring; parental emotional support	communication with parents; Parental monitoring; parental emotional support	IV	Subjective health and well-being	self-rated health; satisfaction; HBSC Symptom Checklist with life	Sectional
80	1	Perceived Quality of Social Relations and Frequent Drunkenness: A Cross-Sectional Study of Spanish Adolescents	Kjaerulff, T. M., Rivera, F., Jimenez-Iglesias, A., Moreno, C.	2014	Spain	EU	2303	Parental monitoring; Satisfaction with the family	parental monitoring; Satisfaction with the family	IV	Frequent drunkenness	Frequent drunkenness	Sectional
101	1	Associations between socioeconomic and family determinants and weight-control behaviours among adolescents	Tur-Sinai, A., Kolobov, T., Tesler, R., Baron-Epel, O., Dvir, K., Harel-Fisch, Y.	2020	Israel	ME	4390	SES; communication with parents; family support; parental monitoring; family meals	FAS; subjective family wealth; communication with parents; family support; parental monitoring; family meal	IV	Weight-control behaviours	Weight-control behaviours	Sectional
102	1	Individual and environmental predictors of health risk behaviours among Dutch adolescents: The HBSC study	Harakeh, Z., De Looze, M. E., Schrijvers, C. T. M., van Dorsselaer, S. A. F. M., Vollebergh, W. A. M.	2012	Netherlands	EU	1742	SES; communication with parents; parental monitoring; alcohol drinking-related parental rules	FAS; communication with parents; mother's monitoring; Parental rules on alcohol drinking	IV	Health risk behaviour	Tobacco smoking; binge drinking; cannabis smoking; early sexual intercours	Sectional
106	1	The Associations between Family-Related Factors and Excessive Internet Use in Adolescents	Faltynkova, A., Blinka, L., Sevcikova, A., Husarova, D.	2020	Slovakia	EU	2547	SES; family structure; parental emotional support; Parental promotion of autonomy; Parental monitoring ; Family activity; communication with parents	Subjective family wealth; Household compostion; Parental Bonding Instrument; Parental monitoring; Family activities; communication with parents	IV	Excessive Internet Use	Excessive Internet Use scale	Sectional
116	1	Protective factors of substance use in youth subcultures	Bobakova, D., Geckova, A. M., Klein, D., Reijneveld, S. A., van Dijk, J. P.	2012	Slovakia	EU	1605	Parental monitoring; Parental emotional support; Parental substance use	Parental monitoring; Emotional support from parents; Parental tobacco/alcohol/drug use	IV	Substance Use	smoking cigarettes; drinking alcohol; drunkenness; cannabis use	Sectional
130	1	Parent, school, and peer factors related to US adolescents' diet and exercise	Chung, S. J., Ersig, A. L., McCarthy, A. M.	2018	US	NA	5248	Family structure; communication with parents; parental monitoring	Household composition; communication with parents; parental monitoring	IV	Eating behaviour	breakfast and soft drink consumption	Sectional
132	1	Associations between Finnish 9th grade students' school perceptions, health behaviors, and family factors	Ilona, Haapasalo, Raili, Välimaa, Lasse, Kannas	2012	Finland	EU	1670	Parental bonding; Parental monitoring; SES	Parental bonding; Parental monitoring; subjective family wealth	IV	Health behaviours	smoking; alcohol use; physical activity; breakfast consumption; sleep	Sectional
144	1	Physical and social factors associated with early adolescent headache and stomachache pain	Fife, B., Forste, R.	2018	US	NA	12070	parental monitoring; satisfaction with the family relationships	parental monitoring; Satisfaction with the family	IV	headache; stomachache	HBSC Symptom Checklist	Sectional
152	1	Prevalence and familial predictors of suicidal behaviour among adolescents in Lithuania: a cross-sectional survey 2014	Zaborskis, A., Sirvyte, D., Zemaitiene, N.	2016	Lithuania	EU	2542	SES; Family structure; Family communication; Satisfaction with family relationships; Parental monitoring; Emotional support; School-related parental support; Parenting style; Family activity; Electronic media communication with parents; Seeing the parents	FAS; Household composition; Communication with Parents; Family Dynamics Measure; Satisfaction with family relationships; Parental monitoring; Parental bonding; parental disciplinary styles; Family activities; Electronic media communication with parents; Seeing the parents	IV	Suicide and self-harm	Youth Risk Behaviour Survey	Sectional
181	1	Inequalities in toothbrushing among adolescents in Scotland 1998-2006	Levin, K. A., Currie, C.	2009	Scotland	EU	15460	Family structure; SES; parental monitoring	Household composition; FAS	IV	toothbrushing	toothbrushing	Sectional
194	1	Protective and risk factors of early sexual initiation in youth subcultures	Bobakova, D., Geckova, A. M., Klein, D., van Dijk, J. P., Reijneveld, S. A.	2013	Slovakia	EU	1380	Parental monitoring; Parental bonding	Parental monitoring; Parental bonding;	IV	early sexual intercourse	Sexual intercourse	Sectional
195	1	Parent-Child Relationships and Adolescents' Life Satisfaction Across the First Decade of the New Millennium	Jimenez-Iglesias, A., Garcia-Moya, I., Moreno, C.	2017	Spain	EU	46593	Parental emotional support; Communication with parents; Parental monitoring; family activity	Parental Bonding Instrument–Brief Current form ; Communication with parents; Parental monitoring; family activities	IV	Life satisfaction	Life satisfaction	Trend
213	1	Parents' support and knowledge of their daughters' lives, and females' early sexual initiation in nine European countries	Madkour, A. S., Farhat, T., Halpern, C. T., Gabhainn, S. N., Godeau, E.	2012	multiple(N=9)	EU	7466	Parental emotional support; Parental monitoring	Parental Bonding Instrument; Parental monitoring	IV	Early sexual initiation	Early sexual initiation	Sectional
215	1	Life Satisfaction in Adolescents: The Role of Individual and Social Health Assets	Calmeiro, L., Camacho, I., de Matos, M. G.	2018	Portugual	EU	3494	Family support; Parental monitoring	Family support; Parental monitoring	IV	Life Satisfaction	Life Satisfaction	Sectional
218	1	Associations between life contexts and early sexual initiation among young women in France	Jovic, Sonia, Delpierre, Cyrille, Ehlinger, Virginie, Sentenac, Mariane, Young, Honor, Arnaud, Catherine, Godeau, Emmanuelle	2014	France	EU	1094	Family structure; communication with parents; parental bonding; parental monitoring	Household compositionl;communication with parents; bonding; parental monitoring	IV	Early sexual initiation	Early sexual initiation	Sectional
230	1	Psychosocial correlates of adolescent marijuana use: Variations by status of marijuana use	Farhat, T., Simons-Morton, B., Luk, J. W.	2011	US	NA	1465	Parental monitoring	Parental monitoring	IV	marijuana use	Former experimental use; Current occasional use; Current frequent use	Sectional
237	1	Socialization instances linked to cannabis experimentation among French teenagers	Jovic, S., Genolini, C., Delpierre, C., Spilka, S., Ehlinger, V., Ross, J., Arnaud, C., Godeau, E.	2014	France	EU	4175	SES; Family structure;Communication with parents; Parental monitoring	Parents’ occupational social class; FAS; Household composition; Communication with parents; Parental monitoring	IV	Cannabis Experimentation	cannabis consumption	Sectional
283		Exploring Sex Differences in the Association between Bullying Involvement and Alcohol and Marijuana Use among US Adolescents in 6(th) to 10(th) Grade	Lee, J., Choi, M. J., Thornberg, R., Hong, J. S.	2020	US	NA	7084	Parental monitoring; parental emotional support; SES; Satisfaction with family relationships	Parental monitoring; parental emotional support; subjective family wealth; Family satisfaction	IV	alcohol use; marijuana use	alcohol use; marijuana use	Sectional
211	1	Prevalence of emergency contraceptive pill use among Spanish adolescent girls and their family and psychological profiles	Jimenez-Iglesias, A., Moreno, C., Garcia-Moya, I., Rivera, F.	2018	Spain	EU	1735	Parental monitoring; Communication with parents	Parental monitoring; Communication with parents	IV	emergency contraceptive pill	emergency contraceptive pill	Sectional
113	1	Socio-demographic variability in adolescent substance use: Mediation by parents and peers	Wang, J., Simons-Morton, B. G., Farhart, T., Luk, J. W.	2009	US	NA	8795	Family structure; SES; parental monitoring	household compositionl; FAS; parental monitoring	IV and mediator	Substance Use	Sdrinking alcohol; being drunk; smoking cigarettes	Sectional	Family structure; family affluence-IV; parental monitoring- mediator
108	1	The Role of the Family in Promoting Responsible Substance Use in Adolescence	Jimenez-Iglesias, A., Moreno, C., Rivera, F., Garcia-Moya, I.	2013	Spain	EU	14825	Parental emotional support; Parental Promotion of Autonomy; Family Activity; Parental monitoring; Sources of parental knowledge	Parental Bonding Inventory-Brief Current Form; Family Activities; Parental monitoring; Perceived Sources of Parental Knowledge	IV and moderator	Substance Use	cigarette/alcohol/cannabis use	Sectional	Parental monitoring--mod
109	1	What family dimensions are important for health-related quality of life in adolescence?	Jimenez-Iglesias, A., Moreno, C., Ramos, P., Rivera, F.	2015	Spain	EU	14825	Parental emotional support; Parental Promotion of Autonomy; Family Activity; Parental monitoring; Sources of Parental Knowledge	Parental Bonding Inventory-Brief Current Form; Family Activities; Parental monitoring; Perceived Sources of Parental Knowledge	IV and moderator	Health-related quality of life	KIDSCREEN-10 index questionnaire	Sectional	Parental monitoring--mod
123	1	Parents, teachers and peer relations as predictors of risk behaviors and mental well-being among immigrant and Israeli born adolescents	Walsh, S. D., Harel-Fisch, Y., Fogel-Grinvald, H.	2010	Ireland	EU	7866	Immigrant status; Communication with parents; Family activity; Parental monitoring; School-related parental support	Immigrant status; Communication with parents; Family activity; Parental monitoring; School-related parental support	IV and moderator	Health risk behaviours; Wellbeing	Smoking; Drinking; HBSC Symptoms Checklist	Sectional	Immigrant status -- moderator; Relationship with parents --IV
150	1	Social Capital as a Moderator of the Relationship Between Perceived Discrimination and Alcohol and Cannabis Use Among Immigrant and Non-immigrant Adolescents in Israel	Walsh, S. D., Kolobov, T., Harel-Fisch, Y.	2018	Israel	ME	8598	Parental monitoring; SES; Immigrant status	Parental monitoring; FAS; Immigrant status	IV and moderator	Substance Use	Alcohol/cannabis use	Sectional	Parental monitoring- IV and mod; SES, Immigrant status--IV
253		What Protects Adolescents with Youth Subculture Affiliation from Excessive Internet Use?	Bobakova, D. F., Holubcikova, J., Geckova, A. M., Veselska, Z. D.	2018	Slovakia	EU	532	SES; Parental monitoring; Family support	Subjective family wealth; Parental monitoring; Family support (subscale of Perceived Social Support Scale)	IV and moderator	Excessive Internet use	Excessive Internet Use Scale	Sectional
103	1	Alcohol consumption in adolescence: the role of adolescents? gender, parental control, and family dinners attendance in an Italian HBSC sample	Perasso, G., Carone, N., Barone, L., Celata, C., Coppola, L., Baggio, B., Velasco, V., Lavatelli, M., Gelmi, G., Biffi, L., Marella, M., Pellegrini, C., Perego, O., De Agostini, W., Benedusi, M., Duregon, P., Meconi, A., Zagheno, C., Salinetti, M. V., Salada, M., Mauri, E., Drusetta, V., Use, L. A., Giannellini, A., Di Cosimo, F., Peruzzo, L., Rocco, T. G., Sala, J., Zoppi, C., Artioli, B., Stamp…	2019	Italy	EU	906	Parental monitoring; Family meals	Parental monitoring; Family dinners frequency	mediatior and moderator	Alcohol use	alcohol consumption frequency	Sectional	parental monitoring-mediator
254		The role of education, parents and peers in adolescent heavy episodic drinking	Vermeulen-Smit, E., Ter Bogt, T. F. M., Verdurmen, J. E. E., Van Dorsselaer, Safm, Vollebergh, W. A. M.	2012	Netherlands	EU	5169	Parental monitoring; alcohol-drinking-related parental rules	Parental monitoring; Parental rules	mediator	Heavy episodic drinking	Heavy episodic drinking	Sectional	parental monitoring-mediator

## Sheet: ParentalEmoSupport
Synthesis of articles measuring parental emotional support
New ID	Decision	Title	Authors	Publication Year	Country	Area	Sample size	Family Variable	Measurement for family	Family role (IV/Mediator/Moderator)	Children's health outcomes	Measurements for children	Design (Sectional/Trend)	Note
2	1	Parental knowledge and adolescent adjustment: Substance use and health-related quality of life	Jiménez-Iglesias, A., Moreno, C., Carmen Granado-Alcón, M., López, A.	2012	Spain	EU	15942	Parental monitoring; parental emotional support; Sources of parental knowledge	Perceived parental knowledge scale; Parental Bonding Inventory-Brief Current; Sources of parental knowledge	IV	Substance use; Health-related quality of life	Tobacco/Alcohol/Cannabis use frequency; KIDSCREEN-10 index questionnaire	Sectional
34	1	Familial determinants of current smoking among adolescents of Lithuania: a cross-sectional survey 2014	Zaborskis, A., Sirvyte, D.	2015	Lithuania	EU	3696	SES; Family structure; Communication with parents; Family communication; Satisfaction with family relationships; Parental monitoring; Parental emotional support; Parental promotion of autonomy; Family time together; School-related parental support; Parenting style; Electronic media communication with parents; Seeing of parents	FAS; Household composition; Communication with parents;Short Version of Family Dynamics Measure II; Satisfaction with family relationships; Parental monitoring; Parental bonding (two-dimension); Joint family activity; School-related parental support; Parental disciplinary styles measurement; Electronic media communication with parents; Seeing of parents	IV	Smoking behaviour	Smoking behaviour	Sectional
51	1	Family Social Environment and Parenting Predictors of Alcohol Use among Adolescents in Lithuania	Sumskas, L., Zaborskis, A.	2017	Lithuania	EU	3715	Family structure; SES; Satisfaction with family relationships; Communication with parents; Parental monitoring; Family communication; school-related parental support; Parental emotional support; Parenting style; Family activity; Electronic media communication with parents; Seeing parents	Household composition; FAS; Satisfaction with family relationships; Communication with parents; Parental monitoring; Quality of communication with family; school-related parental support; Parental emotional support; Parenting style; Family time together; Electronic media communication with parents; Seeing parents	IV	Weekly alcohol use	Weekly alcohol use	Sectional
76	1	Family, School and Health in Children and Adolescents Findings from the 2006 HBSC Study in Greece	Karademas, E. C., Peppa, N., Fotiou, A., Kokkevi, A.	2008	Greece	EU	3034	communication with parents; Parental monitoring; parental emotional support	communication with parents; Parental monitoring; parental emotional support	IV	Subjective health and well-being	self-rated health; satisfaction; HBSC Symptom Checklist with life	Sectional
98	1	An investigation of the impact of family dynamics on obesity among African American adolescent girls	McDyess, Tina D.	2018	US	NA	806	SES; family structure; Parental promotion of autonomy; Parental emotional support	FAS; Household compostion; perceived parental promotion of autonomy;Parental emotional support	IV	Obesity	BMI	Sectional
106	1	The Associations between Family-Related Factors and Excessive Internet Use in Adolescents	Faltynkova, A., Blinka, L., Sevcikova, A., Husarova, D.	2020	Slovakia	EU	2547	SES; family structure; parental emotional support; Parental promotion of autonomy; Parental monitoring ; Family activity; communication with parents	Subjective family wealth; Household compostion; Parental Bonding Instrument; Parental monitoring; Family activities; communication with parents	IV	Excessive Internet Use	Excessive Internet Use scale	Sectional
108	1	The Role of the Family in Promoting Responsible Substance Use in Adolescence	Jimenez-Iglesias, A., Moreno, C., Rivera, F., Garcia-Moya, I.	2013	Spain	EU	14825	Parental emotional support; Parental Promotion of Autonomy; Family Activity; Parental monitoring; Sources of parental knowledge	Parental Bonding Inventory-Brief Current Form; Family Activities; Parental monitoring; Perceived Sources of Parental Knowledge	IV and moderator	Substance Use	cigarette/alcohol/cannabis use	Sectional
109	1	What family dimensions are important for health-related quality of life in adolescence?	Jimenez-Iglesias, A., Moreno, C., Ramos, P., Rivera, F.	2015	Spain	EU	14825	Parental emotional support; Parental Promotion of Autonomy; Family Activity; Parental monitoring; Sources of Parental Knowledge	Parental Bonding Inventory-Brief Current Form; Family Activities; Parental monitoring; Perceived Sources of Parental Knowledge	IV and moderator	Health-related quality of life	KIDSCREEN-10 index questionnaire	Sectional
116	1	Protective factors of substance use in youth subcultures	Bobakova, D., Geckova, A. M., Klein, D., Reijneveld, S. A., van Dijk, J. P.	2012	Slovakia	EU	1605	Parental monitoring; Parental emotional support; Parental substance use	Parental monitoring; Emotional support from parents; Parental tobacco/alcohol/drug use	IV	Substance Use	smoking cigarettes; drinking alcohol; drunkenness; cannabis use	Sectional
122	1	Social capital does matter for adolescent health: evidence from the English HBSC study	Morgan, A., Haglund, B. J. A.	2009	England	EU	6425	SES; Family activity; Parental emotional support; Parental promotion of autonomy	FAS; Family activities; Parental control	IV	Self-reported health; physical activity; smoking; drinking	Self-reported health; physical activity; smoking; drinking	Sectional
152	1	Prevalence and familial predictors of suicidal behaviour among adolescents in Lithuania: a cross-sectional survey 2014	Zaborskis, A., Sirvyte, D., Zemaitiene, N.	2016	Lithuania	EU	2542	SES; Family structure; Family communication; Satisfaction with family relationships; Parental monitoring; Emotional support; School-related parental support; Parenting style; Family activity; Electronic media communication with parents; Seeing the parents	FAS; Household composition; Communication with Parents; Family Dynamics Measure; Satisfaction with family relationships; Parental monitoring; Parental bonding; parental disciplinary styles; Family activities; Electronic media communication with parents; Seeing the parents	IV	Suicide and self-harm	Youth Risk Behaviour Survey	Sectional
154	1	Does social capital travel? Influences on the life satisfaction of young people living in England and Spain	Morgan, A. R., Rivera, F., Moreno, C., Haglund, B. J. A.	2012	multiple(N=2)	EU	3591	Family activity; Parental promotion of autonomy; parental emotional support	Family activities; Parental Autonomy and Control; Parental social support	IV	Life satisfaction	Life satisfaction item	Sectional
195	1	Parent-Child Relationships and Adolescents' Life Satisfaction Across the First Decade of the New Millennium	Jimenez-Iglesias, A., Garcia-Moya, I., Moreno, C.	2017	Spain	EU	46593	Parental emotional support; Communication with parents; Parental monitoring; family activity	Parental Bonding Instrument–Brief Current form ; Communication with parents; Parental monitoring; family activities	IV	Life satisfaction	Life satisfaction	Trend
213	1	Parents' support and knowledge of their daughters' lives, and females' early sexual initiation in nine European countries	Madkour, A. S., Farhat, T., Halpern, C. T., Gabhainn, S. N., Godeau, E.	2012	multiple(N=9)	EU	7466	Parental emotional support; Parental monitoring	Parental Bonding Instrument; Parental monitoring	IV	Early sexual initiation	Early sexual initiation	Sectional
214	1	Social support, sense of community in school, and self-efficacy as resources during early adolescence: an integrative model	Vieno, A., Santinello, M., Pastore, M., Perkins, D. D.	2007	Italy	EU	7097	parental emotional support	Parental Bonding Inventory	IV	Psychosocial well-being	Life satisfaction; psychosomatic complaints (HBSC Symptom Checklist)	Sectional
283		Exploring Sex Differences in the Association between Bullying Involvement and Alcohol and Marijuana Use among US Adolescents in 6(th) to 10(th) Grade	Lee, J., Choi, M. J., Thornberg, R., Hong, J. S.	2020	US	NA	7084	Parental monitoring; parental emotional support; SES; Satisfaction with family relationships	Parental monitoring; parental emotional support; subjective family wealth; Family satisfaction	IV	alcohol use; marijuana use	alcohol use; marijuana use	Sectional
288		Poor Health and Experiences of Being Bullied in Adolescents: Self-Perceived Overweight and Frustration with Appearance Matter	Lin, Y. C., Latner, J. D., Fung, X. C. C., Lin, C. Y.	2018	US	NA	8303	Parental emotional support	Parental emotional support	IV	self-rated health; Life satisfaction; Psychosomatic symptoms;	self-rated health; Life satisfaction; HBSC symptom Checklist	Sectional

## Sheet: PromotionAutonomy
Synthesis of articles measuring parental promotion of adolescents' autonomy
New ID	Decision	Title	Authors	Publication Year	Country	Area	Sample size	Family Variable	Measurement for family	Family role (IV/Mediator/Moderator)	Children's health outcomes	Measurements for children	Design (Sectional/Trend)	Note
34	1	Familial determinants of current smoking among adolescents of Lithuania: a cross-sectional survey 2014	Zaborskis, A., Sirvyte, D.	2015	Lithuania	EU	3696	SES; Family structure; Communication with parents; Family communication; Satisfaction with family relationships; Parental monitoring; Parental emotional support; Parental promotion of autonomy; Family time together; School-related parental support; Parenting style; Electronic media communication with parents; Seeing of parents	FAS; Household composition; Communication with parents;Short Version of Family Dynamics Measure II; Satisfaction with family relationships; Parental monitoring; Parental bonding (two-dimension); Joint family activity; School-related parental support; Parental disciplinary styles measurement; Electronic media communication with parents; Seeing of parents	IV	Smoking behaviour	Smoking behaviour	Sectional
98	1	An investigation of the impact of family dynamics on obesity among African American adolescent girls	McDyess, Tina D.	2018	US	NA	806	SES; family structure; Parental promotion of autonomy; Parental emotional support	FAS; Household compostion; perceived parental promotion of autonomy;Parental emotional support	IV	Obesity	BMI	Sectional
106	1	The Associations between Family-Related Factors and Excessive Internet Use in Adolescents	Faltynkova, A., Blinka, L., Sevcikova, A., Husarova, D.	2020	Slovakia	EU	2547	SES; family structure; parental emotional support; Parental promotion of autonomy; Parental monitoring ; Family activity; communication with parents	Subjective family wealth; Household compostion; Parental Bonding Instrument; Parental monitoring; Family activities; communication with parents	IV	Excessive Internet Use	Excessive Internet Use scale	Sectional
108	1	The Role of the Family in Promoting Responsible Substance Use in Adolescence	Jimenez-Iglesias, A., Moreno, C., Rivera, F., Garcia-Moya, I.	2013	Spain	EU	14825	Parental emotional support; Parental Promotion of Autonomy; Family Activity; Parental monitoring; Sources of parental knowledge	Parental Bonding Inventory-Brief Current Form; Family Activities; Parental monitoring; Perceived Sources of Parental Knowledge	IV and moderator	Substance Use	cigarette/alcohol/cannabis use	Sectional
109	1	What family dimensions are important for health-related quality of life in adolescence?	Jimenez-Iglesias, A., Moreno, C., Ramos, P., Rivera, F.	2015	Spain	EU	14825	Parental emotional support; Parental Promotion of Autonomy; Family Activity; Parental monitoring; Sources of Parental Knowledge	Parental Bonding Inventory-Brief Current Form; Family Activities; Parental monitoring; Perceived Sources of Parental Knowledge	IV and moderator	Health-related quality of life	KIDSCREEN-10 index questionnaire	Sectional
122	1	Social capital does matter for adolescent health: evidence from the English HBSC study	Morgan, A., Haglund, B. J. A.	2009	England	EU	6425	SES; Family activity; Parental emotional support; Parental promotion of autonomy	FAS; Family activities; Parental control	IV	Self-reported health; physical activity; smoking; drinking	Self-reported health; physical activity; smoking; drinking	Sectional
154	1	Does social capital travel? Influences on the life satisfaction of young people living in England and Spain	Morgan, A. R., Rivera, F., Moreno, C., Haglund, B. J. A.	2012	multiple(N=2)	EU	3591	Family activity; Parental promotion of autonomy; parental emotional support	Family activities; Parental Autonomy and Control; Parental social support	IV	Life satisfaction	Life satisfaction item	Sectional
172	1	Self-harm in adolescence: protective health assets in the family, school and community	Klemera, E., Brooks, F. M., Chester, K. L., Magnusson, J., Spencer, N.	2017	England	EU	1521	Communication with parents; family activity; Parental promotion of autonomy; Family support	Communication with parents; family activites; Personal autonomy in relation to family; Family support	IV	Self-harm	Self-harm	Sectional

## Sheet: SchoolRelatSupport
Synthesis of articles measuring school-related parental support
New ID	Decision	Title	Authors	Publication Year	Country	Area	Sample size	Family Variable	Measurement for family	Family role (IV/Mediator/Moderator)	Children's health outcomes	Measurements for children	Design (Sectional/Trend)	Note
4	1	Socioeconomic and behavioral determinants of tooth brushing frequency: results from the representative French 2010 HBSC cross-sectional study	de Grado, G. F., Ehlinger, V., Godeau, E., Sentenac, M., Arnaud, C., Nabet, C., Monsarrat, P.	2018	France	EU	7567	SES; Family structure; Relationships with parents; School-related parental support	FAS; Perceived family wealth; Both parents of high socio-professional category; Household composition; Communication with parents; Parental monitoring; Parental bonding; Number of children in family; School-related parental support	IV	Tooth brushing	Tooth brushing	Sectional	"relationship with parents": a composite variable
34	1	Familial determinants of current smoking among adolescents of Lithuania: a cross-sectional survey 2014	Zaborskis, A., Sirvyte, D.	2015	Lithuania	EU	3696	SES; Family structure; Communication with parents; Family communication; Satisfaction with family relationships; Parental monitoring; Parental emotional support; Parental promotion of autonomy; Family time together; School-related parental support; Parenting style; Electronic media communication with parents; Seeing of parents	FAS; Household composition; Communication with parents;Short Version of Family Dynamics Measure II; Satisfaction with family relationships; Parental monitoring; Parental bonding (two-dimension); Joint family activity; School-related parental support; Parental disciplinary styles measurement; Electronic media communication with parents; Seeing of parents	IV	Smoking behaviour	Smoking behaviour	Sectional
51	1	Family Social Environment and Parenting Predictors of Alcohol Use among Adolescents in Lithuania	Sumskas, L., Zaborskis, A.	2017	Lithuania	EU	3715	Family structure; SES; Satisfaction with family relationships; Communication with parents; Parental monitoring; Family communication; school-related parental support; Parental emotional support; Parenting style; Family activity; Electronic media communication with parents; Seeing parents	Household composition; FAS; Satisfaction with family relationships; Communication with parents; Parental monitoring; Quality of communication with family; school-related parental support; Parental emotional support; Parenting style; Family time together; Electronic media communication with parents; Seeing parents	IV	Weekly alcohol use	Weekly alcohol use	Sectional
64	1	Explaining socioeconomic differences in adolescent self-rated health: the contribution of material, psychosocial and behavioural factors	Richter, M., Moor, I., van Lenthe, F. J.	2012	Germany	EU	7274	SES; School-related parental support	FAS; subjective family wealth; school-related parental support	IV	Self-rated health	Self-rated health	Sectional
96	1	The relationship between body mass index and unhealthy weight control behaviors among adolescents: The role of family and peer social support	Vander Wal, J. S.	2012	US	NA	4598	communication with parents; school-related parental support; Communication with siblings	communication with parents; school-related parental support; Communication with siblings	IV	Unhealthy weight control behaviors;Possible disordered eating behavior	Unhealthy weight control behaviors;Possible disordered eating behavior	Sectional
123	1	Parents, teachers and peer relations as predictors of risk behaviors and mental well-being among immigrant and Israeli born adolescents	Walsh, S. D., Harel-Fisch, Y., Fogel-Grinvald, H.	2010	Ireland	EU	7866	Immigrant status; Communication with parents; Family activity; Parental monitoring; School-related parental support	Immigrant status; Communication with parents; Family activity; Parental monitoring; School-related parental support	IV and moderator	Health risk behaviours; Wellbeing	Smoking; Drinking; HBSC Symptoms Checklist	Sectional	Immigrant status -- moderator; Relationship with parents --IV
124	1	Social capital and adolescent smoking in schools and communities: A cross-classified multilevel analysis	De Clercq, B., Pfoertner, T. K., Elgar, F. J., Hublet, A., Maes, L.	2014	Belgium Flanders	EU	8453	Parental smoking; SES; School-related parental support	Parental smoking; FAS; School-related support	IV	Smoking	Smoking frequency	Sectional
141	1	Psychosocial work environment in school and students' somatic health complaints: An analysis of buffering resources	Sonmark, K., Modin, B.	2017	Sweden	EU	9427	School-related parental support	School-related parental support	IV and moderator	Somatic health	HBSC symptom checklist	Sectional	Parental support was IV, also moderated the relationship between DV and school demand
143	1	Psychosocial working conditions: An analysis of emotional symptoms and conduct problems amongst adolescent students	Plenty, S., Ostberg, V., Almquist, Y. B., Augustine, L., Modin, B.	2014	Sweden	EU	3685	School-related parental support	School-related parental support	IV and moderator	Emotional symptoms and conduct problems	The Strengths and Difficulties Questionnaire	Sectional	However, parental support did not moderate the effect of school demand significantly
145	1	Family-related school issues and the mental health of adolescents: Post hoc analyses of the Portuguese national health behaviour in school-aged children survey data	Matos, M. G., Dadds, M. R., Barrett, P. M.	2006	Portugual	EU	5326	Communcation with parents; School-related parental support; SES	Communcation with parents; School related parental support; Father’s occupational social class	IV	Anxiety/Depression; Physical Health	HBSC Symptom Checklist; Self-rated health; Depression	Sectional
152	1	Prevalence and familial predictors of suicidal behaviour among adolescents in Lithuania: a cross-sectional survey 2014	Zaborskis, A., Sirvyte, D., Zemaitiene, N.	2016	Lithuania	EU	2542	SES; Family structure; Family communication; Satisfaction with family relationships; Parental monitoring; Emotional support; School-related parental support; Parenting style; Family activity; Electronic media communication with parents; Seeing the parents	FAS; Household composition; Communication with Parents; Family Dynamics Measure; Satisfaction with family relationships; Parental monitoring; Parental bonding; parental disciplinary styles; Family activities; Electronic media communication with parents; Seeing the parents	IV	Suicide and self-harm	Youth Risk Behaviour Survey	Sectional
179	1	Suicidal ideation and behaviors within the school context: Perceived teacher, peer and parental support	Madjar, N., Walsh, S. D., Harel-Fisch, Y.	2018	Israel	ME	4242	School-related parental support	School-related parental support	IV	Suicide ideation and behaviours	Youth Risk Survelliance System	Sectional
286		School-Related Social Support and Students' Perceived Life Satisfaction	Danielsen, A. G., Samdal, O., Hetland, J., Wold, B.	2009	Norway	EU	3358	School-related parental support	School-related parental support	IV	Life satisfaction	Students’ Life Satisfaction Scale	Sectional

## Sheet: Bonding
Synthesis of articles measuring parent-adolescent bonding
New ID	Decision	Title	Authors	Publication Year	Country	Area	Sample size	Family Variable	Measurement for family	Family role (IV/Mediator/Moderator)	Children's health outcomes	Measurements for children	Design (Sectional/Trend)	Note
132	1	Associations between Finnish 9th grade students' school perceptions, health behaviors, and family factors	Ilona, Haapasalo, Raili, Välimaa, Lasse, Kannas	2012	Finland	EU	1670	Parental bonding; Parental monitoring; SES	Parental bonding; Parental monitoring; subjective family wealth	IV	Health behaviours	smoking; alcohol use; physical activity; breakfast consumption; sleep	Sectional
194	1	Protective and risk factors of early sexual initiation in youth subcultures	Bobakova, D., Geckova, A. M., Klein, D., van Dijk, J. P., Reijneveld, S. A.	2013	Slovakia	EU	1380	Parental monitoring; Parental bonding	Parental monitoring; Parental bonding;	IV	early sexual intercourse	Sexual intercourse	Sectional
218	1	Associations between life contexts and early sexual initiation among young women in France	Jovic, Sonia, Delpierre, Cyrille, Ehlinger, Virginie, Sentenac, Mariane, Young, Honor, Arnaud, Catherine, Godeau, Emmanuelle	2014	France	EU	1094	Family structure; communication with parents; parental bonding; parental monitoring	Household compositionl;communication with parents; bonding; parental monitoring	IV	Early sexual initiation	Early sexual initiation	Sectional
266		The Mediating Effect of Social Controls on Marijuana Use Among Adolescent Bullies, Victims, and Bully-Victims: A Comparison of Various Approaches to Mediation	Cho, S., Norman, L.	2019	US	NA	12642	Parental bonding	Parental bonding	Mediator	Marijuana use	Marijuana use	Sectional

## Sheet: Rules
Synthesis of articles measuring parental rules on adolescents' health behaviours
New ID	Decision	Title	Authors	Publication Year	Country	Area	Sample size	Family Variable	Measurement for family	Family role (IV/Mediator/Moderator)	Children's health outcomes	Measurements for children	Design (Sectional/Trend)	Note
81	1	Lack of parental rule-setting on eating is associated with a wide range of adolescent unhealthy eating behaviour both for boys and girls	Holubcikova, J., Kolarcik, P., Madarasova Geckova, A., Van Dijk, J. P., Reijneveld, S. A.	2016	Slovakia	EU	2765	Eating-related parental rules; SES	Eating-related parental rules; subjective family wealth; Parents' education	IV	Eating Habits	Breakfast habit; Fruit/vegetables/sweets/Soft drinks/energy drinks consumption;	Sectional
102	1	Individual and environmental predictors of health risk behaviours among Dutch adolescents: The HBSC study	Harakeh, Z., De Looze, M. E., Schrijvers, C. T. M., van Dorsselaer, S. A. F. M., Vollebergh, W. A. M.	2012	Netherlands	EU	1742	SES; communication with parents; parental monitoring; alcohol drinking-related parental rules	FAS; communication with parents; mother's monitoring; Parental rules on alcohol drinking	IV	Health risk behaviour	Tobacco smoking; binge drinking; cannabis smoking; early sexual intercours	Sectional
212	1	Soft drink consumption in adolescence: associations with food-related lifestyles and family rules in Belgium Flanders and the Veneto Region of Italy	Verzeletti, C., Maes, L., Santinello, M., Vereecken, C. A.	2010	Belgium	EU	14407	family meals; soft-drink-related parental rules	daily breakfast with parents; daily evening dinner with parents; soft-drink-related parental rules	IV	Soft drink consumption	Soft drink consumption	Sectional
245		Food-related family lifestyle associated with fruit and vegetable consumption among young adolescents in Belgium Flanders and the Veneto Region of Italy	Verzeletti, C., Maes, L., Santinello, M., Baldassari, D., Vereecken, C. A.	2010	multiple(N=2)	EU	14407	SES;family meals; eating-related parental rules	FAS; Dinner with family; Family rules of eating	IV	Fruit/vegetable consumption	Fruit/vegetable consumption	Sectional
254		The role of education, parents and peers in adolescent heavy episodic drinking	Vermeulen-Smit, E., Ter Bogt, T. F. M., Verdurmen, J. E. E., Van Dorsselaer, Safm, Vollebergh, W. A. M.	2012	Netherlands	EU	5169	Parental monitoring; alcohol-drinking-related parental rules	Parental monitoring; Parental rules	mediator	Heavy episodic drinking	Heavy episodic drinking	Sectional
264		How parents can affect excessive spending of time on screen-based activities	Brindova, D., Pavelka, J., Ševčikova, A., Žežula, I., Van Dijk, J. P., Reijneveld, S. A., Geckova, A. M.	2014	multiple(N=2)	EU		Family structure; Screening-time-related parental rules; Family activitiy	Household compostition; Parental restriction of screen related activities; Family activitiy	IV and moderator	Screen-based activities	Screen-based activities	Sectional
39	1	School connectedness and daily smoking among boys and girls: the influence of parental smoking norms	Rasmussen, M., Damsgaard, M. T., Holstein, B. E., Poulsen, L. H., Due, P.	2005	Denmark	EU	1537	Parents’ attitude toward children's future smoking; Parental smoking; SES	Parents’ attitude toward children's future smoking; Parental smoking; Parents’ employment	IV	Smoking behaviour	Daily smoking	Sectional

## Sheet: Parenting style
Synthesis of articles measuring parenting style
New ID	Decision	Title	Authors	Publication Year	Country	Area	Sample size	Family Variable	Measurement for family	Family role (IV/Mediator/Moderator)	Children's health outcomes	Measurements for children	Design (Sectional/Trend)	Note
34	1	Familial determinants of current smoking among adolescents of Lithuania: a cross-sectional survey 2014	Zaborskis, A., Sirvyte, D.	2015	Lithuania	EU	3696	SES; Family structure; Communication with parents; Family communication; Satisfaction with family relationships; Parental monitoring; Parental emotional support; Parental promotion of autonomy; Family time together; School-related parental support; Parenting style; Electronic media communication with parents; Seeing of parents	FAS; Household composition; Communication with parents;Short Version of Family Dynamics Measure II; Satisfaction with family relationships; Parental monitoring; Parental bonding (two-dimension); Joint family activity; School-related parental support; Parental disciplinary styles measurement; Electronic media communication with parents; Seeing of parents	IV	Smoking behaviour	Smoking behaviour	Sectional
51	1	Family Social Environment and Parenting Predictors of Alcohol Use among Adolescents in Lithuania	Sumskas, L., Zaborskis, A.	2017	Lithuania	EU	3715	Family structure; SES; Satisfaction with family relationships; Communication with parents; Parental monitoring; Family communication; school-related parental support; Parental emotional support; Parenting style; Family activity; Electronic media communication with parents; Seeing parents	Household composition; FAS; Satisfaction with family relationships; Communication with parents; Parental monitoring; Quality of communication with family; school-related parental support; Parental emotional support; Parenting style; Family time together; Electronic media communication with parents; Seeing parents	IV	Weekly alcohol use	Weekly alcohol use	Sectional
152	1	Prevalence and familial predictors of suicidal behaviour among adolescents in Lithuania: a cross-sectional survey 2014	Zaborskis, A., Sirvyte, D., Zemaitiene, N.	2016	Lithuania	EU	2542	SES; Family structure; Family communication; Satisfaction with family relationships; Parental monitoring; Emotional support; School-related parental support; Parenting style; Family activity; Electronic media communication with parents; Seeing the parents	FAS; Household composition; Communication with Parents; Family Dynamics Measure; Satisfaction with family relationships; Parental monitoring; Parental bonding; parental disciplinary styles; Family activities; Electronic media communication with parents; Seeing the parents	IV	Suicide and self-harm	Youth Risk Behaviour Survey	Sectional

## Sheet: Special
Synthesis of articles including some special parenting measurements
New ID	Decision	Title	Authors	Publication Year	Country	Area	Sample size	Family Variable	Measurement for family	Family role (IV/Mediator/Moderator)	Children's health outcomes	Measurements for children	Design (Sectional/Trend)	Note
34	1	Familial determinants of current smoking among adolescents of Lithuania: a cross-sectional survey 2014	Zaborskis, A., Sirvyte, D.	2015	Lithuania	EU	3696	SES; Family structure; Communication with parents; Family communication; Satisfaction with family relationships; Parental monitoring; Parental emotional support; Parental promotion of autonomy; Family time together; School-related parental support; Parenting style; Electronic media communication with parents; Seeing of parents	FAS; Household composition; Communication with parents;Short Version of Family Dynamics Measure II; Satisfaction with family relationships; Parental monitoring; Parental bonding (two-dimension); Joint family activity; School-related parental support; Parental disciplinary styles measurement; Electronic media communication with parents; Seeing of parents	IV	Smoking behaviour	Smoking behaviour	Sectional
51	1	Family Social Environment and Parenting Predictors of Alcohol Use among Adolescents in Lithuania	Sumskas, L., Zaborskis, A.	2017	Lithuania	EU	3715	Family structure; SES; Satisfaction with family relationships; Communication with parents; Parental monitoring; Family communication; school-related parental support; Parental emotional support; Parenting style; Family activity; Electronic media communication with parents; Seeing parents	Household composition; FAS; Satisfaction with family relationships; Communication with parents; Parental monitoring; Quality of communication with family; school-related parental support; Parental emotional support; Parenting style; Family time together; Electronic media communication with parents; Seeing parents	IV	Weekly alcohol use	Weekly alcohol use	Sectional
152	1	Prevalence and familial predictors of suicidal behaviour among adolescents in Lithuania: a cross-sectional survey 2014	Zaborskis, A., Sirvyte, D., Zemaitiene, N.	2016	Lithuania	EU	2542	SES; Family structure; Family communication; Satisfaction with family relationships; Parental monitoring; Emotional support; School-related parental support; Parenting style; Family activity; Electronic media communication with parents; Seeing the parents	FAS; Household composition; Communication with Parents; Family Dynamics Measure; Satisfaction with family relationships; Parental monitoring; Parental bonding; parental disciplinary styles; Family activities; Electronic media communication with parents; Seeing the parents	IV	Suicide and self-harm	Youth Risk Behaviour Survey	Sectional
168	1	Irregular breakfast consumption in adolescence and the family environment: Underlying causes by family structure	Levin, K. A., Kirby, J.	2012	Scotland	EU	16406	Family structure; SES; Seeing parents; Perceived parenting; Communication with parents; Communication with siblings	Household composition; FAS; Contact with parents; Perceived parenting; Communication with parents; Communication with siblings	IV and moderator	Irregular breakfast consumption	Daily breakfast consumption	Sectional	Family structure was a moderator
239	1	Bullying, family resources, and mental health: A test of the ABC-X theory	Resnick, Elise M.	2014	US	NA	9198	Communication with parents; Seeing parents; Satisfaction with Family Relationships	Communication with parents; Seeing parents; Satisfaction with Family Relationships	IV and moderator	Mental health; Life satisfaction	Mental health; Life satisfaction	Sectional
112	1	Emotional and Psychosocial Factors Associated With Drunkenness and the Use of Tobacco and Cannabis in Adolescence: Independent or Interactive Effects?	García-Moya, I., Ortiz Barón, M. J., Moreno, C.	2017	Spain	EU	1752	parental emotional support; relationships with parents; parental monitoring; satisfaction with family relationships	parental emotional support; communication with parents; parental monitoring; satisfaction with family relationships	IV and moderator	substance use	drunkenness; tobacco use; cannabisuse	Sectional

## Sheet: AllParenting
Synthesis of all articles including the relationship between parenting behaviours and adolescents' health outcomes
New ID	Decision	Title	Authors	Publication Year	Country	Area	Sample size	Family Variable	Measurement for family	Family role (IV/Mediator/Moderator)	Children's health outcomes	Measurements for children	Design (Sectional/Trend)	Note
1	1	Smoking in young people with asthma	Hublet, A., De Bacquer, D., Boyce, W., Godeau, E., Schmid, H., Vereecken, C., De Baets, F., Maes, L.	2007	multiple (N=6)	EU+NA	9735	Communication with parents; Parental smoking	Communication with parents; Parental smoking	IV	Smoking	Daily smoking	Sectional
2	1	Parental knowledge and adolescent adjustment: Substance use and health-related quality of life	Jiménez-Iglesias, A., Moreno, C., Carmen Granado-Alcón, M., López, A.	2012	Spain	EU	15942	Parental monitoring; parental emotional support; Sources of parental knowledge	Perceived parental knowledge scale; Parental Bonding Inventory-Brief Current; Sources of parental knowledge	IV	Substance use; Health-related quality of life	Tobacco/Alcohol/Cannabis use frequency; KIDSCREEN-10 index questionnaire	Sectional
3	1	Parental, peer and school experiences as predictors of alcohol drinking among first and second generation immigrant adolescents in Israel	Walsh, S. D., Djalovski, A., Boniel-Nissim, M., Harel-Fisch, Y.	2014	Israel	ME	3059	SES; Communication with parents; Parental monitoring	FAS; Communication with parents; Parental monitoring	IV	Alcohol drinking	Casual drinking; Drunkenness; Binge drinking	Sectional
4	1	Socioeconomic and behavioral determinants of tooth brushing frequency: results from the representative French 2010 HBSC cross-sectional study	de Grado, G. F., Ehlinger, V., Godeau, E., Sentenac, M., Arnaud, C., Nabet, C., Monsarrat, P.	2018	France	EU	7567	SES; Family structure; Relationships with parents; School-related parental support	FAS; Perceived family wealth; Both parents of high socio-professional category; Household composition; Communication with parents; Parental monitoring; Parental bonding; Number of children in family; School-related parental support	IV	Tooth brushing	Tooth brushing	Sectional	"relationship with parents": a composite variable
9	1	Health outcomes among Swedish children: The role of social capital in the family, school and neighbourhood	Eriksson, U., Hochwälder, J., Carlsund, A., Sellström, E.	2012	Sweden	EU	3926	Communication with parents	Communication with parents	IV	Subjective health complaints; Subjective well-being	HBSC Symptoms Checklist; Subjective well-being scale	Sectional
10	1	Does family communication moderate the association between adverse childhood experiences and emotional and behavioural problems?	Lackova Rebicova, M., Dankulincova Veselska, Z., Husarova, D., Klein, D., Madarasova Geckova, A., Van Dijk, J. P., Reijneveld, S. A.	2020	Slovakia	EU	5202	Communication with parents	Communication with mother; Communication with father	IV and moderator	Internalizing and externalizing problems	Strengths and Difficulties Questionnaire	Sectional
32	1	Associations of behavioural, psychosocial and socioeconomic factors with over- and underweight among German adolescents	Mikolajczyk, R. T., Richter, M.	2008	Germany	EU	5650	Family structure; SES; communication with parents	Household composition; Parents’ occupational social class ; FAS; communication with parents	IV	Underweight/overweight	BMI	Sectional	SES had two indicators: FAS and parents' OSC
34	1	Familial determinants of current smoking among adolescents of Lithuania: a cross-sectional survey 2014	Zaborskis, A., Sirvyte, D.	2015	Lithuania	EU	3696	SES; Family structure; Communication with parents; Family communication; Satisfaction with family relationships; Parental monitoring; Parental emotional support; Parental promotion of autonomy; Family time together; School-related parental support; Parenting style; Electronic media communication with parents; Seeing of parents	FAS; Household composition; Communication with parents;Short Version of Family Dynamics Measure II; Satisfaction with family relationships; Parental monitoring; Parental bonding (two-dimension); Joint family activity; School-related parental support; Parental disciplinary styles measurement; Electronic media communication with parents; Seeing of parents	IV	Smoking behaviour	Smoking behaviour	Sectional
37	1	Socioeconomic inequalities in adolescent smoking across 35 countries: A multilevel analysis of the role of family, school and peers	Moor, I., Rathmann, K., Lenzi, M., Pförtner, T. K., Nagelhout, G. E., De Looze, M., Bendtsen, P., Willemsen, M., Kannas, L., Kunst, A. E., Richter, M.	2015	multiple(N=35)	Global	52907	SES; Communication with parents; Family structure	FAS; Communication with parents; Household composition	IV	Tobacco smoking	Weekly smoking	Sectional
39	1	School connectedness and daily smoking among boys and girls: the influence of parental smoking norms	Rasmussen, M., Damsgaard, M. T., Holstein, B. E., Poulsen, L. H., Due, P.	2005	Denmark	EU	1537	Parents’ attitude toward children's future smoking; Parental smoking; SES	Parents’ attitude toward children's future smoking; Parental smoking; Parents’ employment	IV	Smoking behaviour	Daily smoking	Sectional
51	1	Family Social Environment and Parenting Predictors of Alcohol Use among Adolescents in Lithuania	Sumskas, L., Zaborskis, A.	2017	Lithuania	EU	3715	Family structure; SES; Satisfaction with family relationships; Communication with parents; Parental monitoring; Family communication; school-related parental support; Parental emotional support; Parenting style; Family activity; Electronic media communication with parents; Seeing parents	Household composition; FAS; Satisfaction with family relationships; Communication with parents; Parental monitoring; Quality of communication with family; school-related parental support; Parental emotional support; Parenting style; Family time together; Electronic media communication with parents; Seeing parents	IV	Weekly alcohol use	Weekly alcohol use	Sectional
53	1	Adolescents’ drinking and drunkenness more likely in one-parent families and due to poor communication with mother	Tomčíková, Z., Dankulincová Veselská, Z., Madarasová Gecková, A., van Dijk, J. P., Reijneveld, S. A.	2015	Slovakia	EU	3882	Communication with Parents; Family Composition	Communication with Parents; Household composition	IV	Frequent Alcohol Drinking; Lifetime Drunkenness	Frequency of alcohol drinking; Lifetime Drunkenness	Sectional
56	1	Greenlandic family structure and communication with parents: influence on schoolchildren's drinking behaviour	del Carmen, M., Alcón, G., Pedersen, J. M., María, A., González, C.	2002	Greenland	EU	1648	SES; Family structure; communication with parents	parents' occupational level; Household composition; communication with parents	IV	Alcohol consumption	Alcohol consumption	Sectional
58	1	EXPERIENCE OF CZECH CHILDREN WITH ALCOHOL CONSUMPTION IN RELATION TO SELECTED FAMILY INDICATORS	Hodacova, L., Smejkalova, J., Cermakova, E., Kalman, M.	2017	Czech	EU	4293	Family structure; family activity; communication with parents	Household composition; time with family; communication with parents	IV	alcohol consumption; experience of drunkenness	alcohol consumption; experience of drunkenness	Sectional
62	1	Psychosocial and behavioural factors in the explanation of socioeconomic inequalities in adolescent health: a multilevel analysis in 28 European and North American countries	Moor, I., Rathmann, K., Stronks, K., Levin, K., Spallek, J., Richter, M.	2014	multiple(N=28)	EU+NA	117460	SES; communication with parents	FAS; communication with parents	IV	Self-rated health	Self-rated health	Sectional
63	1	Breakfast frequency among adolescents: associations with measures of family functioning	Pedersen, T. P., Holstein, B. E., Damsgaard, M. T., Rasmussen, M.	2016	Denmark	EU	3054	SES; communication with parents; family communication; family support	communication with parents; Quality of family communication; family support; parents' occupational social class; migration status; household composition	IV	Breakfast consumption	Breakfast consumption during weekdays	Sectional
64	1	Explaining socioeconomic differences in adolescent self-rated health: the contribution of material, psychosocial and behavioural factors	Richter, M., Moor, I., van Lenthe, F. J.	2012	Germany	EU	7274	SES; School-related parental support	FAS; subjective family wealth; school-related parental support	IV	Self-rated health	Self-rated health	Sectional
76	1	Family, School and Health in Children and Adolescents Findings from the 2006 HBSC Study in Greece	Karademas, E. C., Peppa, N., Fotiou, A., Kokkevi, A.	2008	Greece	EU	3034	communication with parents; Parental monitoring; parental emotional support	communication with parents; Parental monitoring; parental emotional support	IV	Subjective health and well-being	self-rated health; satisfaction; HBSC Symptom Checklist with life	Sectional
80	1	Perceived Quality of Social Relations and Frequent Drunkenness: A Cross-Sectional Study of Spanish Adolescents	Kjaerulff, T. M., Rivera, F., Jimenez-Iglesias, A., Moreno, C.	2014	Spain	EU	2303	Parental monitoring; Satisfaction with the family	parental monitoring; Satisfaction with the family	IV	Frequent drunkenness	Frequent drunkenness	Sectional
81	1	Lack of parental rule-setting on eating is associated with a wide range of adolescent unhealthy eating behaviour both for boys and girls	Holubcikova, J., Kolarcik, P., Madarasova Geckova, A., Van Dijk, J. P., Reijneveld, S. A.	2016	Slovakia	EU	2765	Eating-related parental rules; SES	Eating-related parental rules; subjective family wealth; Parents' education	IV	Eating Habits	Breakfast habit; Fruit/vegetables/sweets/Soft drinks/energy drinks consumption;	Sectional
82	1	Socio-economic position and adolescents' health in Italy: the role of the quality of social relations	Zambon, A., Lemma, P., Borraccino, A., Dalmasso, P., Cavallo, F.	2006	Italy	EU	4386	SES; Communication with parents	FAS; communication with parents	IV	health behaviours	smoking; alcohol use; frequency of physical activity; cannabis use.	Sectional
85	1	Close relations to parents and emotional symptoms among adolescents: beyond socio-economic impact?	Damsgaard, M. T., Holstein, B. E., Koushede, V., Madsen, K. R., Meilstrup, C., Nelausen, M. K., Nielsen, L., Rayce, S. B.	2014	Denmark	EU	15646	Communication with parents; SES	Communication with parents; parents' occupational class	IV and moderator	Emotional symptoms	HBSC Symptom Check List	Sectional	Relationship - IV; SES - moderator
94	1	Adolescent Weight Status: Associations With Structural and Functional Dimensions of Social Relations	Kjelgaard, H. H., Holstein, B. E., Due, P., Brixval, C. S., Rasmussen, M.	2017	Denmark	EU	4922	communication with parents	communication with parents	IV	overweight	BMI	Sectional
96	1	The relationship between body mass index and unhealthy weight control behaviors among adolescents: The role of family and peer social support	Vander Wal, J. S.	2012	US	NA	4598	communication with parents; school-related parental support; Communication with siblings	communication with parents; school-related parental support; Communication with siblings	IV	Unhealthy weight control behaviors;Possible disordered eating behavior	Unhealthy weight control behaviors;Possible disordered eating behavior	Sectional
98	1	An investigation of the impact of family dynamics on obesity among African American adolescent girls	McDyess, Tina D.	2018	US	NA	806	SES; family structure; Parental promotion of autonomy; Parental emotional support	FAS; Household compostion; perceived parental promotion of autonomy;Parental emotional support	IV	Obesity	BMI	Sectional
99	1	Psychosocial factors of different health behaviour patterns in adolescents: Association with overweight and weight control behaviours	Veloso, S. M., Matos, M. G., Carvalho, M., Diniz, J. A.	2012	Portugual	EU	3069	satisfaction with family relationships; communication with parents;	satisfaction with family relationships; communication with parents;	IV	Health Behaviours	physical activity; sedentary behaviours	Sectional
100	1	Gender-specific substance use patterns and associations with individual, family, peer, and school factors in 15-year-old Portuguese adolescents: A latent class regression analysis	Picoito, J., Santos, C., Loureiro, I., Aguiar, P., Nunes, C.	2019	Portugual	EU	1553	SES; family structure; communication with parents	FAS; household compostion; communication with parents	IV	use of alcohol, tobacco; drunkenness	use of alcohol, tobacco; drunkenness	Sectional
101	1	Associations between socioeconomic and family determinants and weight-control behaviours among adolescents	Tur-Sinai, A., Kolobov, T., Tesler, R., Baron-Epel, O., Dvir, K., Harel-Fisch, Y.	2020	Israel	ME	4390	SES; communication with parents; family support; parental monitoring; family meals	FAS; subjective family wealth; communication with parents; family support; parental monitoring; family meal	IV	Weight-control behaviours	Weight-control behaviours	Sectional
102	1	Individual and environmental predictors of health risk behaviours among Dutch adolescents: The HBSC study	Harakeh, Z., De Looze, M. E., Schrijvers, C. T. M., van Dorsselaer, S. A. F. M., Vollebergh, W. A. M.	2012	Netherlands	EU	1742	SES; communication with parents; parental monitoring; alcohol drinking-related parental rules	FAS; communication with parents; mother's monitoring; Parental rules on alcohol drinking	IV	Health risk behaviour	Tobacco smoking; binge drinking; cannabis smoking; early sexual intercours	Sectional
103	1	Alcohol consumption in adolescence: the role of adolescents? gender, parental control, and family dinners attendance in an Italian HBSC sample	Perasso, G., Carone, N., Barone, L., Celata, C., Coppola, L., Baggio, B., Velasco, V., Lavatelli, M., Gelmi, G., Biffi, L., Marella, M., Pellegrini, C., Perego, O., De Agostini, W., Benedusi, M., Duregon, P., Meconi, A., Zagheno, C., Salinetti, M. V., Salada, M., Mauri, E., Drusetta, V., Use, L. A., Giannellini, A., Di Cosimo, F., Peruzzo, L., Rocco, T. G., Sala, J., Zoppi, C., Artioli, B., Stamp…	2019	Italy	EU	906	Parental monitoring; Family meals	Parental monitoring; Family dinners frequency	mediatior and moderator	Alcohol use	alcohol consumption frequency	Sectional
104	1	Parent-child communication and substance use among adolescents: Do father and mother communication play a different role for sons and daughters?	Luk, J. W., Farhat, T., Iannotti, R. J., Simons-Morton, B. G.	2010	US	NA	1308	Communication with parents	Communication with mother; Communication with father	IV	Substance Use	cigarette smoking; alcohol drinking	Sectional
106	1	The Associations between Family-Related Factors and Excessive Internet Use in Adolescents	Faltynkova, A., Blinka, L., Sevcikova, A., Husarova, D.	2020	Slovakia	EU	2547	SES; family structure; parental emotional support; Parental promotion of autonomy; Parental monitoring ; Family activity; communication with parents	Subjective family wealth; Household compostion; Parental Bonding Instrument; Parental monitoring; Family activities; communication with parents	IV	Excessive Internet Use	Excessive Internet Use scale	Sectional
108	1	The Role of the Family in Promoting Responsible Substance Use in Adolescence	Jimenez-Iglesias, A., Moreno, C., Rivera, F., Garcia-Moya, I.	2013	Spain	EU	14825	Parental emotional support; Parental Promotion of Autonomy; Family Activity; Parental monitoring; Sources of parental knowledge	Parental Bonding Inventory-Brief Current Form; Family Activities; Parental monitoring; Perceived Sources of Parental Knowledge	IV and moderator	Substance Use	cigarette/alcohol/cannabis use	Sectional
109	1	What family dimensions are important for health-related quality of life in adolescence?	Jimenez-Iglesias, A., Moreno, C., Ramos, P., Rivera, F.	2015	Spain	EU	14825	Parental emotional support; Parental Promotion of Autonomy; Family Activity; Parental monitoring; Sources of Parental Knowledge	Parental Bonding Inventory-Brief Current Form; Family Activities; Parental monitoring; Perceived Sources of Parental Knowledge	IV and moderator	Health-related quality of life	KIDSCREEN-10 index questionnaire	Sectional
110	1	Family Structure and Adolescent Substance Use: An International Perspective	Hoffmann, J. P.	2017	multiple(N=37)	Global	193202	SES; family structure; communication with parents	FAS; Household composition; communication with parents	IV and mediator	substance use	cigarette/alcohol/cannabis use	Sectional
112	1	Emotional and Psychosocial Factors Associated With Drunkenness and the Use of Tobacco and Cannabis in Adolescence: Independent or Interactive Effects?	García-Moya, I., Ortiz Barón, M. J., Moreno, C.	2017	Spain	EU	1752	parental emotional support; communication with parents; parental monitoring; satisfaction with family relationships	parental emotional support; communication with parents; parental monitoring; satisfaction with family relationships	IV and moderator	substance use	drunkenness; tobacco use; cannabisuse	Sectional
113	1	Socio-demographic variability in adolescent substance use: Mediation by parents and peers	Wang, J., Simons-Morton, B. G., Farhart, T., Luk, J. W.	2009	US	NA	8795	Family structure; SES; parental monitoring	household compositionl; FAS; parental monitoring	IV and mediator	Substance Use	Sdrinking alcohol; being drunk; smoking cigarettes	Sectional	Family structure; family affluence-IV; parental monitoring- mediator
115	1	Adolescent substance abuse, the importance of family, school and peers: data from the health behaviour in school children	Jovic-Vranes, A. S., Vranes, B., Marinkovic, J., Cucic, V.	2005	Serbia	EU	1540	Family structure; communication with parents	Household composition; communication with parents	IV	Substance Use	alcohol consumption; drug use;	Sectional
116	1	Protective factors of substance use in youth subcultures	Bobakova, D., Geckova, A. M., Klein, D., Reijneveld, S. A., van Dijk, J. P.	2012	Slovakia	EU	1605	Parental monitoring; Parental emotional support; Parental substance use	Parental monitoring; Emotional support from parents; Parental tobacco/alcohol/drug use	IV	Substance Use	smoking cigarettes; drinking alcohol; drunkenness; cannabis use	Sectional
122	1	Social capital does matter for adolescent health: evidence from the English HBSC study	Morgan, A., Haglund, B. J. A.	2009	England	EU	6425	SES; Family activity; Parental emotional support; Parental promotion of autonomy	FAS; Family activities; Parental control	IV	Self-reported health; physical activity; smoking; drinking	Self-reported health; physical activity; smoking; drinking	Sectional
123	1	Parents, teachers and peer relations as predictors of risk behaviors and mental well-being among immigrant and Israeli born adolescents	Walsh, S. D., Harel-Fisch, Y., Fogel-Grinvald, H.	2010	Ireland	EU	7866	Immigrant status; Communication with parents; Family activity; Parental monitoring; School-related parental support	Immigrant status; Communication with parents; Family activity; Parental monitoring; School-related parental support	IV and moderator	Health risk behaviours; Wellbeing	Smoking; Drinking; HBSC Symptoms Checklist	Sectional	Immigrant status -- moderator; Relationship with parents --IV
124	1	Social capital and adolescent smoking in schools and communities: A cross-classified multilevel analysis	De Clercq, B., Pfoertner, T. K., Elgar, F. J., Hublet, A., Maes, L.	2014	Belgium Flanders	EU	8453	Parental smoking; SES; School-related parental support	Parental smoking; FAS; School-related support	IV	Smoking	Smoking frequency	Sectional
125	1	Cross-national evidence for the clustering and psychosocial correlates of adolescent risk behaviours in 27 countries	de Looze, M., ter Bogt, T. F. M., Raaijmakers, Q. A. W., Pickett, W., Kuntsche, E., Vollebergh, W. A. M.	2015	multiple(N=27)	EU+NA	56090	Communication with parents	Communication with parents	IV	Health risk behaviours	substance use; sexual activity	Sectional
127	1	Substance use in Portuguese and Spanish adolescents: Highlights from differences, similarities and moderating effects	Simões, C., Matos, M. G., Moreno, C., Rivera, F., Batista-Foguet, J. M., Simons-Morton, B.	2012	multiple(N=2)	EU	5780	Communication with parents	Communication with parents	IV	Substance Use	tobacco/alcohol/cannabis use	Sectional
130	1	Parent, school, and peer factors related to US adolescents' diet and exercise	Chung, S. J., Ersig, A. L., McCarthy, A. M.	2018	US	NA	5248	Family structure; communication with parents; parental monitoring	Household composition; communication with parents; parental monitoring	IV	Eating behaviour	breakfast and soft drink consumption	Sectional
131	1	Investigating Cannabis Use Normalization by Distinguishing Between Experimental and Regular Use: A Multilevel Study in 31 Countries	Sznitman, S. R., Kolobov, T., ter Bogt, T., Kuntsche, E., Walsh, S. D., Harel-Fisch, Y.	2015	multiple(N=31)	Global	62009	communication with parents	communication with parents	IV	Cannabis use	Cannabis use	Sectional
132	1	Associations between Finnish 9th grade students' school perceptions, health behaviors, and family factors	Ilona, Haapasalo, Raili, Välimaa, Lasse, Kannas	2012	Finland	EU	1670	Parental bonding; Parental monitoring; SES	Parental bonding; Parental monitoring; subjective family wealth	IV	Health behaviours	smoking; alcohol use; physical activity; breakfast consumption; sleep	Sectional
135	1	Portuguese Adolescents: the Importance of Parents and Peer Groups in Positive Health	Tome, G., de Matos, M. G., Camacho, I., Simoes, C., Diniz, J. A.	2012	Portugual	EU	3636	Communication with Parents	Communication with Parents	IV and moderator	subjective health complaints	HBSC Symptom Checklist	Sectional	Family moderated peer communication effects
140	1	The role of individual and macro-level social determinants on young adolescents' psychosomatic complaints	Ottova, V., Erhart, M., Vollebergh, W., Kökönyei, G., Morgan, A., Gobina, I., Jericek, H., Cavallo, F., Välimaa, R., de Matos, M. G., Gaspar, T., Schnohr, C. W., Ravens-Sieberer, U.	2012	multiple(N=34)	EU	98773	communication with parents; family structure; SES	communication with parents; family structure; FAS	IV	Psychosomatic complaints	HBSC symptom checklist	Sectional
141	1	Psychosocial work environment in school and students' somatic health complaints: An analysis of buffering resources	Sonmark, K., Modin, B.	2017	Sweden	EU	9427	School-related parental support	School-related parental support	IV and moderator	Somatic health	HBSC symptom checklist	Sectional	Parental support was IV, also moderated the relationship between DV and school demand
143	1	Psychosocial working conditions: An analysis of emotional symptoms and conduct problems amongst adolescent students	Plenty, S., Ostberg, V., Almquist, Y. B., Augustine, L., Modin, B.	2014	Sweden	EU	3685	School-related parental support	School-related parental support	IV and moderator	Emotional symptoms and conduct problems	The Strengths and Difficulties Questionnaire	Sectional	However, parental support did not moderate the effect of school demand significantly
144	1	Physical and social factors associated with early adolescent headache and stomachache pain	Fife, B., Forste, R.	2018	US	NA	12070	parental monitoring; satisfaction with the family relationships	parental monitoring; Satisfaction with the family	IV	headache; stomachache	HBSC Symptom Checklist	Sectional
145	1	Family-related school issues and the mental health of adolescents: Post hoc analyses of the Portuguese national health behaviour in school-aged children survey data	Matos, M. G., Dadds, M. R., Barrett, P. M.	2006	Portugual	EU	5326	Communcation with parents; School-related parental support; SES	Communcation with parents; School related parental support; Father’s occupational social class	IV	Anxiety/Depression; Physical Health	HBSC Symptom Checklist; Self-rated health; Depression	Sectional
147	1	Peer, family integration and other determinants of cannabis use among teenagers	Kohn, L., Kittel, F., Piette, D.	2004	Belgium French	EU	744	Communication with parents; SES	Communication with parents; number of subjects contributing to family income	IV	Substance Use	Tobacco/alcohol/drug use	Sectional
150	1	Social Capital as a Moderator of the Relationship Between Perceived Discrimination and Alcohol and Cannabis Use Among Immigrant and Non-immigrant Adolescents in Israel	Walsh, S. D., Kolobov, T., Harel-Fisch, Y.	2018	Israel	ME	8598	Parental monitoring; SES; Immigrant status	Parental monitoring; FAS; Immigrant status	IV and moderator	Substance Use	Alcohol/cannabis use	Sectional	Parental monitoring- IV and mod; SES, Immigrant status--IV
152	1	Prevalence and familial predictors of suicidal behaviour among adolescents in Lithuania: a cross-sectional survey 2014	Zaborskis, A., Sirvyte, D., Zemaitiene, N.	2016	Lithuania	EU	2542	SES; Family structure; Family communication; Satisfaction with family relationships; Parental monitoring; Emotional support; School-related parental support; Parenting style; Family activity; Electronic media communication with parents; Seeing the parents	FAS; Household composition; Communication with Parents; Family Dynamics Measure; Satisfaction with family relationships; Parental monitoring; Parental bonding; parental disciplinary styles; Family activities; Electronic media communication with parents; Seeing the parents	IV	Suicide and self-harm	Youth Risk Behaviour Survey	Sectional
154	1	Does social capital travel? Influences on the life satisfaction of young people living in England and Spain	Morgan, A. R., Rivera, F., Moreno, C., Haglund, B. J. A.	2012	multiple(N=2)	EU	3591	Family activity; Parental promotion of autonomy; parental emotional support	Family activities; Parental Autonomy and Control; Parental social support	IV	Life satisfaction	Life satisfaction item	Sectional
168	1	Irregular breakfast consumption in adolescence and the family environment: Underlying causes by family structure	Levin, K. A., Kirby, J.	2012	Scotland	EU	16406	Family structure; SES; Seeing parents; Perceived parenting; Communication with parents; Communication with siblings	Household composition; FAS; Contact with parents; Perceived parenting; Communication with parents; Communication with siblings	IV and moderator	Irregular breakfast consumption	Daily breakfast consumption	Sectional	Family structure was a moderator
171	1	Family structure and children's living conditions. A comparative study of 24 countries	Låftman, S. B.	2010	multiple(N=24)	Global	90808	Family structure; communication with parents	Household composition; communication with parents	IV	Health complaints; self-rated health	HBSC Symptom Checklist; self-rated health	Sectional
172	1	Self-harm in adolescence: protective health assets in the family, school and community	Klemera, E., Brooks, F. M., Chester, K. L., Magnusson, J., Spencer, N.	2017	England	EU	1521	Communication with parents; family activity; Parental promotion of autonomy; Family support	Communication with parents; family activites; Personal autonomy in relation to family; Family support	IV	Self-harm	Self-harm	Sectional
177	1	Influence on self-rated health of socio-demographic, lifestyle and affluence factors: an analysis of the Irish and International Health Behaviours Among School-Aged Children (HBSC) datasets 1998	Kelleher, C. C., Tay, J., Gabhainn, S. N.	2007	Ireland and Global(N=15)	Ireland and Global	115327	SES; Communication with parents	FAS; Communication with parents	IV	self rated health	self rated health	Sectional
179	1	Suicidal ideation and behaviors within the school context: Perceived teacher, peer and parental support	Madjar, N., Walsh, S. D., Harel-Fisch, Y.	2018	Israel	ME	4242	School-related parental support	School-related parental support	IV	Suicide ideation and behaviours	Youth Risk Survelliance System	Sectional
181	1	Inequalities in toothbrushing among adolescents in Scotland 1998-2006	Levin, K. A., Currie, C.	2009	Scotland	EU	15460	Family structure; SES; parental monitoring	Household composition; FAS	IV	toothbrushing	toothbrushing	Sectional
187	1	Suicidal Ideation, Risk Factors, and Communication With Parents An HBSC Study on School Children in Estonia, Lithuania, and Luxembourg	Mark, L., Samm, A., Tooding, L. M., Sisask, M., Aasvee, K., Zaborskis, A., Zemaitiene, N., Varnik, A.	2013	multiple(N=3)	EU	4954	Communication with Parents	Communication with Parents	IV	suicidal ideation	suicidal ideation	Sectional
194	1	Protective and risk factors of early sexual initiation in youth subcultures	Bobakova, D., Geckova, A. M., Klein, D., van Dijk, J. P., Reijneveld, S. A.	2013	Slovakia	EU	1380	Parental monitoring; Parental bonding	Parental monitoring; Parental bonding;	IV	early sexual intercourse	Sexual intercourse	Sectional
195	1	Parent-Child Relationships and Adolescents' Life Satisfaction Across the First Decade of the New Millennium	Jimenez-Iglesias, A., Garcia-Moya, I., Moreno, C.	2017	Spain	EU	46593	Parental emotional support; Communication with parents; Parental monitoring; family activity	Parental Bonding Instrument–Brief Current form ; Communication with parents; Parental monitoring; family activities	IV	Life satisfaction	Life satisfaction	Trend
198	1	The Association Between Adolescent Life Satisfaction, Family Structure, Family Affluence and Gender Differences in Parent-Child Communication	Levin, K. A., Dallago, L., Currie, C.	2012	Scotland	EU	5126	Family structure; SES; communication with parents		IV and moderator	Life Satisfaction	Life Satisfaction	Sectional	interaction term between family structure and parent–child communication
200	1	Shared physical custody after family split-up: implications for health and well-being in Swedish schoolchildren	Carlsund, A., Eriksson, U., Sellstrom, E.	2013	Sweden	EU	10286	Family structure; communication with parents	Household composition; communication with parents	IV	subjective health complaints; subjective wellbeing	HBSC Symptom Checklist; Wellbeing scale	Sectional
201	1	Risk behaviour in Swedish adolescents: is shared physical custody after divorce a risk or a protective factor?	Carlsund, A., Eriksson, U., Lofstedt, P., Sellstrom, E.	2013	Sweden	EU	3699	SES; Immigrant status; Communication with parents; Family structure	Parental employment; subjective family wealth; Immigrant status; Communication with parents; Household composition	IV	Smoking; Drinking; Sexual debut; Conduct problems	Smoking; Drinking; Sexual debut; Strengths and Difficulties Questionnaire	Sectional
202	1	Analysis of the importance of family in the development of sense of coherence during adolescence	García Moya, I., Moreno, C., Jiménez Iglesias, A., Rivera, F., Lindström, B.	2012	Spain	EU	7580	SES; parental emonitional support ; Parental monitoring; Communication with parents; Satisfaction with relationship between parents; Family activity	Family affluence; Parental Bonding Instrument ; Parental monitoring; Communication with parents; Quality of the relationship between parents; Frequency of family activities	IV	Sense of Coherence	Sense of coherence scale	Sectional
211	1	Prevalence of emergency contraceptive pill use among Spanish adolescent girls and their family and psychological profiles	Jimenez-Iglesias, A., Moreno, C., Garcia-Moya, I., Rivera, F.	2018	Spain	EU	1735	Parental monitoring; Communication with parents	Parental monitoring; Communication with parents	IV	emergency contraceptive pill	emergency contraceptive pill	Sectional
212	1	Soft drink consumption in adolescence: associations with food-related lifestyles and family rules in Belgium Flanders and the Veneto Region of Italy	Verzeletti, C., Maes, L., Santinello, M., Vereecken, C. A.	2010	Belgium	EU	14407	family meals; soft-drink-related parental rules	daily breakfast with parents; daily evening dinner with parents; soft-drink-related parental rules	IV	Soft drink consumption	Soft drink consumption	Sectional
213	1	Parents' support and knowledge of their daughters' lives, and females' early sexual initiation in nine European countries	Madkour, A. S., Farhat, T., Halpern, C. T., Gabhainn, S. N., Godeau, E.	2012	multiple(N=9)	EU	7466	Parental emotional support; Parental monitoring	Parental Bonding Instrument; Parental monitoring	IV	Early sexual initiation	Early sexual initiation	Sectional
214	1	Social support, sense of community in school, and self-efficacy as resources during early adolescence: an integrative model	Vieno, A., Santinello, M., Pastore, M., Perkins, D. D.	2007	Italy	EU	7097	parental emotional support	Parental Bonding Inventory	IV	Psychosocial well-being	Life satisfaction; psychosomatic complaints (HBSC Symptom Checklist)	Sectional
215	1	Life Satisfaction in Adolescents: The Role of Individual and Social Health Assets	Calmeiro, L., Camacho, I., de Matos, M. G.	2018	Portugual	EU	3494	Family support; Parental monitoring	Family support; Parental monitoring	IV	Life Satisfaction	Life Satisfaction	Sectional
218	1	Associations between life contexts and early sexual initiation among young women in France	Jovic, Sonia, Delpierre, Cyrille, Ehlinger, Virginie, Sentenac, Mariane, Young, Honor, Arnaud, Catherine, Godeau, Emmanuelle	2014	France	EU	1094	Family structure; communication with parents; parental bonding; parental monitoring	Household compositionl;communication with parents; bonding; parental monitoring	IV	Early sexual initiation	Early sexual initiation	Sectional
220	1	Trends over Time in Adolescent Emotional Wellbeing in the Netherlands, 2005-2017: Links with Perceived Schoolwork Pressure, Parent-Adolescent Communication and Bullying Victimization	De Looze, M. E., Cosma, A. P., Vollebergh, W. A. M., Duinhof, E. L., de Roos, S. A., van Dorsselaer, S., van Bon-Martens, M. J. H., Vonk, R., Stevens, G. W. J. M.	2020	Netherlands	EU	21901	Communication with parents	Communication with parents	IV	Emotional symptoms; Psychosomatic complaints; Life satisfaction	Strengths and Difficulties Questionnaire; HBSC Symptom Checklist; Life satisfaction	Sectional
221	1	Suicidal thoughts and depressive feelings amongst Estonian schoolchildren: effect of family relationship and family structure	Samm, A., Tooding, L. M., Sisask, M., Kolves, K., Aasvee, K., Varnik, A.	2010	Estonia	EU	4389	satisfaction with family relationships; communication with parents; family structures; SES	family satisfaction; communication with parents; household composition; family economic deprivation based on FAS	IV	suicidal ideation; depressive feelings	suicidal ideation; depressive feelings	Sectional
224	1	Weight concerns among adolescent boys	Kelly, C., Fitzgerald, A., Sentenac, M., Gakewski, J., Molcho, M., Nic Gabhainn, S.	2016	Ireland	EU	6187	Family meals; Communication with parents; SES; Family structure	Breakfast with family; Communication with parents; Maternal employment; Family structure	IV	Weight concerns	Weight concerns	Sectional
230	1	Psychosocial correlates of adolescent marijuana use: Variations by status of marijuana use	Farhat, T., Simons-Morton, B., Luk, J. W.	2011	US	NA	1465	Parental monitoring	Parental monitoring	IV	marijuana use	Former experimental use; Current occasional use; Current frequent use	Sectional
234	1	Multiple risk behaviors and suicidal ideation and behavior among Israeli and Palestinian adolescents	Harel-Fisch, Y., Abdeen, Z., Walsh, S. D., Radwan, Q., Fogel-Grinvald, H.	2012	Israel	ME	8345	communication with parents	communication with parents	IV	Suicidal ideation and behavior	Suicidal ideation and behavior	Sectional
237	1	Socialization instances linked to cannabis experimentation among French teenagers	Jovic, S., Genolini, C., Delpierre, C., Spilka, S., Ehlinger, V., Ross, J., Arnaud, C., Godeau, E.	2014	France	EU	4175	SES; Family structure;Communication with parents; Parental monitoring	Parents’ occupational social class; FAS; Household composition; Communication with parents; Parental monitoring	IV	Cannabis Experimentation	cannabis consumption	Sectional
239	1	Bullying, family resources, and mental health: A test of the ABC-X theory	Resnick, Elise M.	2014	US	NA	9198	Communication with parents; Seeing parents; Satisfaction with Family Relationships	Communication with parents; Seeing parents; Satisfaction with Family Relationships	IV and moderator	Mental health; Life satisfaction	Mental health; Life satisfaction	Sectional
241		The Happiest Kids on Earth. Gender Equality and Adolescent Life Satisfaction in Europe and North America	de Looze, M. E., Huijts, T., Stevens, G. W. J. M., Torsheim, T., Vollebergh, W. A. M.	2018	multiple(N=34)	EU+NA	171528	SES; Family structure; Communication with parents	Rank of FAS; Family structure; Communication with parents	IV	Life satisfaction	Life satisfaction	Sectional
242		Ethnic differences in youth well-being: The role of sociodemographic background and social support	Runarsdottir, E. M., Vilhjalmsson, R.	2015	Iceland	EU	11435	SES; Family structure; Communication with parents	FAS; Parental employment; Household compostion; Communication with parents	IV	Life satisfaction; Subjective psychosomatic complaints	Life satisfaction; HBSC symptom Checklist	Sectional
244		Supportive communication with parents moderates the negative effects of electronic media use on life satisfaction during adolescence	Boniel-Nissim, M., Tabak, I., Mazur, J., Borraccino, A., Brooks, F., Gommans, R., van der Sluijs, W., Zsiros, E., Craig, W., Harel-Fisch, Y., Finne, E.	2015	multiple(N=9)	EU+NA	53973	SES; Family structure; Communication with parents	FAS; Family structure; Communication with parents;	IV and moderator	Life satisfaction	Life satisfaction	Sectional	FAS, Family structure--IV; Communication with parents-- moderator
245		Food-related family lifestyle associated with fruit and vegetable consumption among young adolescents in Belgium Flanders and the Veneto Region of Italy	Verzeletti, C., Maes, L., Santinello, M., Baldassari, D., Vereecken, C. A.	2010	multiple(N=2)	EU	14407	SES;family meals; eating-related parental rules	FAS; Dinner with family; Family rules of eating	IV	Fruit/vegetable consumption	Fruit/vegetable consumption	Sectional
248		Sustaining a positive body image in adolescence: an assets-based analysis	Fenton, C., Brooks, F., Spencer, N. H., Morgan, A.	2010	England	EU	6425	SES; Family structure; Communication with parents	FAS; Household composition; Communication with parents	IV	Body image	Body image	Sectional
253		What Protects Adolescents with Youth Subculture Affiliation from Excessive Internet Use?	Bobakova, D. F., Holubcikova, J., Geckova, A. M., Veselska, Z. D.	2018	Slovakia	EU	532	SES; Parental monitoring; Family support	Subjective family wealth; Parental monitoring; Family support (subscale of Perceived Social Support Scale)	IV and moderator	Excessive Internet use	Excessive Internet Use Scale	Sectional
254		The role of education, parents and peers in adolescent heavy episodic drinking	Vermeulen-Smit, E., Ter Bogt, T. F. M., Verdurmen, J. E. E., Van Dorsselaer, Safm, Vollebergh, W. A. M.	2012	Netherlands	EU	5169	Parental monitoring; alcohol-drinking-related parental rules	Parental monitoring; Parental rules	mediator	Heavy episodic drinking	Heavy episodic drinking	Sectional
260		Exploring Whether Talking With Parents, Siblings, and Friends Moderates the Association Between Peer Victimization and Adverse Psychosocial Outcomes	Hong, J. S., Zhang, S., Gonzalez-Prendes, A. A., Albdour, M.	2020	US	NA	12642	Family structure; SES; communication with parents; communication with siblings	Family structure; subjective family wealth; communication with parents; communication with siblings	IV and moderator	alcohol/tobacco use; delinquent friend affiliation; internalizing problems	alcohol/tobacco use; delinquent friend affiliation; HBSC Symptom Checklist	Sectional
264		How parents can affect excessive spending of time on screen-based activities	Brindova, D., Pavelka, J., Ševčikova, A., Žežula, I., Van Dijk, J. P., Reijneveld, S. A., Geckova, A. M.	2014	multiple(N=2)	EU		Family structure; Screening-time-related parental rules; Family activitiy	Household compostition; Parental restriction of screen related activities; Family activitiy	IV and moderator	Screen-based activities	Screen-based activities	Sectional
266		The Mediating Effect of Social Controls on Marijuana Use Among Adolescent Bullies, Victims, and Bully-Victims: A Comparison of Various Approaches to Mediation	Cho, S., Norman, L.	2019	US	NA	12642	Parental bonding	Parental bonding	Mediator	Marijuana use	Marijuana use	Sectional
272		Substance Use Across Adolescence: Do Gender and Age Matter?	Simoes, C., Matos, M. G., Batista-Foguet, J. M., Simons-Morton, B.	2014	Portugual	EU	12881	Communication with parents	Communication with parents	IV	Substance Use	Tobacco/alcohol/drug use	Sectional
273		Body weight dissatisfaction and communication with parents among adolescents in 24 countries: international cross-sectional survey	Al Sabbah, H., Vereecken, C. A., Elgar, F. J., Nansel, T., Aasvee, K., Abdeen, Z., Ojala, K., Ahluwalia, N., Maes, L.	2009	multiple(N=24)	EU+NA	160000	Communication with parents	Communication with parents	IV	Body Weight Dissatisfaction	Body Weight Dissatisfaction	Sectional
275		Communication in single- and two-parent families and their influence on Portuguese and Spanish adolescents’ life satisfaction	Camacho, I., Jiménez-Iglesias, A., Rivera, F., Moreno, C., Gaspar de Matos, M.	2020	multiple(N=2)	EU	24070	Family structure; communication with parents	Household composition; communication with parents	IV and moderator	Life satisfaction	Life satisfaction	Sectional	Family structure was a moderator, communication was a IV
283		Exploring Sex Differences in the Association between Bullying Involvement and Alcohol and Marijuana Use among US Adolescents in 6(th) to 10(th) Grade	Lee, J., Choi, M. J., Thornberg, R., Hong, J. S.	2020	US	NA	7084	Parental monitoring; parental emotional support; SES; Satisfaction with family relationships	Parental monitoring; parental emotional support; subjective family wealth; Family satisfaction	IV	alcohol use; marijuana use	alcohol use; marijuana use	Sectional
285		Multiple risk behavior and injury: An international analysis of young people	Pickett, W., Schmid, H., Boyce, W. F., Simpson, K., Scheidt, P. C., Mazur, J., Molcho, M., King, M. A., Godeau, E., Overpeck, M., Aszmann, A., Szabo, M., Harel, Y.	2002	multiple(N=12)	Global	49461	Communication with parents	Communication with parents	IV	Injury	Injury	Sectional
286		School-Related Social Support and Students' Perceived Life Satisfaction	Danielsen, A. G., Samdal, O., Hetland, J., Wold, B.	2009	Norway	EU	3358	School-related parental support	School-related parental support	IV	Life satisfaction	Students’ Life Satisfaction Scale	Sectional
288		Poor Health and Experiences of Being Bullied in Adolescents: Self-Perceived Overweight and Frustration with Appearance Matter	Lin, Y. C., Latner, J. D., Fung, X. C. C., Lin, C. Y.	2018	US	NA	8303	Parental emotional support	Parental emotional support	IV	self-rated health; Life satisfaction; Psychosomatic symptoms;	self-rated health; Life satisfaction; HBSC symptom Checklist	Sectional
