# Supplementary material for: Family Related Variables’ Influences on Adolescents’ Health Based on Health Behaviour in School-Aged Children Database, an AI-Assisted Scoping Review, and Narrative Synthesis
Source: Front Psychol. 2022 Aug 10;13:871795. doi: 10.3389/fpsyg.2022.871795 (PMC9400839; doi:10.3389/fpsyg.2022.871795)
Supplement: Supplementary file 11 [file Table_10.XLSX]

## Sheet: ParentalSmoking
synthesis of articles measuring parental smoking
New ID	Decision	Title	Authors	Publication Year	Country	Area	Sample size	Family Variable	Measurement for family	Family role (IV/Mediator/Moderator)	Children's health outcomes	Measurements for children	Design (Sectional/Trend)	Note
1	1	Smoking in young people with asthma	Hublet, A., De Bacquer, D., Boyce, W., Godeau, E., Schmid, H., Vereecken, C., De Baets, F., Maes, L.	2007	multiple (N=6)	EU+NA	9735	Communication with parents; Parental smoking	Communication with parents; Parental smoking	IV	Smoking	Daily smoking	Sectional
39	1	School connectedness and daily smoking among boys and girls: the influence of parental smoking norms	Rasmussen, M., Damsgaard, M. T., Holstein, B. E., Poulsen, L. H., Due, P.	2005	Denmark	EU	1537	Parents’ attitude toward children's future smoking; Parental smoking; SES	Parents’ attitude toward children's future smoking; Parental smoking; Parents’ employment	IV	Smoking behaviour	Daily smoking	Sectional
124	1	Social capital and adolescent smoking in schools and communities: A cross-classified multilevel analysis	De Clercq, B., Pfoertner, T. K., Elgar, F. J., Hublet, A., Maes, L.	2014	Belgium Flanders	EU	8453	Parental smoking; SES; School-related parental support	Parental smoking; FAS; School-related support	IV	Smoking	Smoking frequency	Sectional

## Sheet: ParentSubstance
synthesis of articles measuring parental substance use
New ID	Decision	Title	Authors	Publication Year	Country	Area	Sample size	Family Variable	Measurement for family	Family role (IV/Mediator/Moderator)	Children's health outcomes	Measurements for children	Design (Sectional/Trend)	Note
116	1	Protective factors of substance use in youth subcultures	Bobakova, D., Geckova, A. M., Klein, D., Reijneveld, S. A., van Dijk, J. P.	2012	Slovakia	EU	1605	Parental monitoring; Parental emotional support; Parental substance use	Parental monitoring; Emotional support from parents; Parental tobacco/alcohol/drug use	IV	Substance Use	smoking cigarettes; drinking alcohol; drunkenness; cannabis use	Sectional

## Sheet: ParentalDrinking
synthesis of articles measuring parental drinking
New ID	Decision	Title	Authors	Publication Year	Country	Area	Sample size	Family Variable	Measurement for family	Family role (IV/Mediator/Moderator)	Children's health outcomes	Measurements for children	Design (Sectional/Trend)	Note
142	1	What is worse? A hierarchy of family-related risk factors predicting alcohol use in adolescence	Kuntsche, E. N., Kuendig, H.	2006	Switzerland	EU	3127	Family Structure; Family drinking; Family communication; Family activity; Family support	Family Structure; Perception of excessive drinking in the family; Family communication; Family activity; Family support	IV	alcohol use	Frequency of alcoholic beverage intake; drunkenness	Sectional

## Sheet: ParentPA
synthesis of articles measuring parental physical activities
New ID	Decision	Title	Authors	Publication Year	Country	Area	Sample size	Family Variable	Measurement for family	Family role (IV/Mediator/Moderator)	Children's health outcomes	Measurements for children	Design (Sectional/Trend)	Note
170	1	Association between potential parental and peers' correlates and physical activity recommendations compliance among 13-16 years old adolescents	Bakalar, P., Kopcakova, J., Geckova, A. M.	2019	Slovakia	EU	3012	Parental physical activity; Family activity	Parental physical activity; Family physical activity	IV	Moderate to vigorous physical activity; Organized sport; Screen-based behaviors	Moderate to vigorous physical activity; Organized sport; Screen-based behaviors	Sectional
231	1	Social reproduction of physical activity: Implications for health promotion in young people	Wold, B., øygard, L., Eder, A., Smith, C.	1994	multiple(N=3)	EU	1233	Parental physical activity	Parental participant in physical activity	IV	physical activity	regular physical activity	Sectional

## Sheet: AllParentHealthBehavior
synthesis of all articles measuring parental health behaviours
New ID	Decision	Title	Authors	Publication Year	Country	Area	Sample size	Family Variable	Measurement for family	Family role (IV/Mediator/Moderator)	Children's health outcomes	Measurements for children	Design (Sectional/Trend)	Note
1	1	Smoking in young people with asthma	Hublet, A., De Bacquer, D., Boyce, W., Godeau, E., Schmid, H., Vereecken, C., De Baets, F., Maes, L.	2007	multiple (N=6)	EU+NA	9735	Communication with parents; Parental smoking	Communication with parents; Parental smoking	IV	Smoking	Daily smoking	Sectional
39	1	School connectedness and daily smoking among boys and girls: the influence of parental smoking norms	Rasmussen, M., Damsgaard, M. T., Holstein, B. E., Poulsen, L. H., Due, P.	2005	Denmark	EU	1537	Parents’ attitude toward children's future smoking; Parental smoking; SES	Parents’ attitude toward children's future smoking; Parental smoking; Parents’ employment	IV	Smoking behaviour	Daily smoking	Sectional
124	1	Social capital and adolescent smoking in schools and communities: A cross-classified multilevel analysis	De Clercq, B., Pfoertner, T. K., Elgar, F. J., Hublet, A., Maes, L.	2014	Belgium Flanders	EU	8453	Parental smoking; SES; School-related parental support	Parental smoking; FAS; School-related support	IV	Smoking	Smoking frequency	Sectional
116	1	Protective factors of substance use in youth subcultures	Bobakova, D., Geckova, A. M., Klein, D., Reijneveld, S. A., van Dijk, J. P.	2012	Slovakia	EU	1605	Parental monitoring; Parental emotional support; Parental substance use	Parental monitoring; Emotional support from parents; Parental tobacco/alcohol/drug use	IV	Substance Use	smoking cigarettes; drinking alcohol; drunkenness; cannabis use	Sectional
142	1	What is worse? A hierarchy of family-related risk factors predicting alcohol use in adolescence	Kuntsche, E. N., Kuendig, H.	2006	Switzerland	EU	3127	Family Structure; Family drinking; Family communication; Family activity; Family support	Family Structure; Perception of excessive drinking in the family; Family communication; Family activity; Family support	IV	alcohol use	Frequency of alcoholic beverage intake; drunkenness	Sectional
170	1	Association between potential parental and peers' correlates and physical activity recommendations compliance among 13-16 years old adolescents	Bakalar, P., Kopcakova, J., Geckova, A. M.	2019	Slovakia	EU	3012	Parental physical activity; Family activity	Parental physical activity; Family physical activity	IV	Moderate to vigorous physical activity; Organized sport; Screen-based behaviors	Moderate to vigorous physical activity; Organized sport; Screen-based behaviors	Sectional
231	1	Social reproduction of physical activity: Implications for health promotion in young people	Wold, B., øygard, L., Eder, A., Smith, C.	1994	multiple(N=3)	EU	1233	Parental physical activity	Parental participant in physical activity	IV	physical activity	regular physical activity	Sectional
