# Supplementary material for: Family Related Variables’ Influences on Adolescents’ Health Based on Health Behaviour in School-Aged Children Database, an AI-Assisted Scoping Review, and Narrative Synthesis
Source: Front Psychol. 2022 Aug 10;13:871795. doi: 10.3389/fpsyg.2022.871795 (PMC9400839; doi:10.3389/fpsyg.2022.871795)
Supplement: Supplementary file 12 [file Table_11.XLSX]

## Sheet: FamilyActivities
synthesis of articles that included all the family activities
New ID	Decision	Title	Authors	Publication Year	Country	Area	Sample size	Family Variable	Measurement for family	Family role (IV/Mediator/Moderator)	Children's health outcomes	Measurements for children	Design (Sectional/Trend)	Note
51	1	Family Social Environment and Parenting Predictors of Alcohol Use among Adolescents in Lithuania	Sumskas, L., Zaborskis, A.	2017	Lithuania	EU	3715	Family structure; SES; Satisfaction with family relationships; Communication with parents; Parental monitoring; Family communication; school-related parental support; Parental emotional support; Parenting style; Family activity; Electronic media communication with parents; Seeing parents	Household composition; FAS; Satisfaction with family relationships; Communication with parents; Parental monitoring; Quality of communication with family; school-related parental support; Parental emotional support; Parenting style; Family time together; Electronic media communication with parents; Seeing parents	IV	Weekly alcohol use	Weekly alcohol use	Sectional
58	1	EXPERIENCE OF CZECH CHILDREN WITH ALCOHOL CONSUMPTION IN RELATION TO SELECTED FAMILY INDICATORS	Hodacova, L., Smejkalova, J., Cermakova, E., Kalman, M.	2017	Czech	EU	4293	Family structure; family activity; communication with parents	Household composition; time with family; communication with parents	IV	alcohol consumption; experience of drunkenness	alcohol consumption; experience of drunkenness	Sectional
106	1	The Associations between Family-Related Factors and Excessive Internet Use in Adolescents	Faltynkova, A., Blinka, L., Sevcikova, A., Husarova, D.	2020	Slovakia	EU	2547	SES; family structure; parental emotional support; Parental promotion of autonomy; Parental monitoring ; Family activity; communication with parents	Subjective family wealth; Household compostion; Parental Bonding Instrument; Parental monitoring; Family activities; communication with parents	IV	Excessive Internet Use	Excessive Internet Use scale	Sectional
108	1	The Role of the Family in Promoting Responsible Substance Use in Adolescence	Jimenez-Iglesias, A., Moreno, C., Rivera, F., Garcia-Moya, I.	2013	Spain	EU	14825	Parental emotional support; Parental Promotion of Autonomy; Family Activity; Parental monitoring; Sources of parental knowledge	Parental Bonding Inventory-Brief Current Form; Family Activities; Parental monitoring; Perceived Sources of Parental Knowledge	IV and moderator	Substance Use	cigarette/alcohol/cannabis use	Sectional	moderator: parental emotional support, autonomy promotion, parental monitoring, family activity
109	1	What family dimensions are important for health-related quality of life in adolescence?	Jimenez-Iglesias, A., Moreno, C., Ramos, P., Rivera, F.	2015	Spain	EU	14825	Parental emotional support; Parental Promotion of Autonomy; Family Activity; Parental monitoring; Sources of Parental Knowledge	Parental Bonding Inventory-Brief Current Form; Family Activities; Parental monitoring; Perceived Sources of Parental Knowledge	IV and moderator	Health-related quality of life	KIDSCREEN-10 index questionnaire	Sectional	moderator: parental emotional support, autonomy promotion, parental monitoring, family activity
122	1	Social capital does matter for adolescent health: evidence from the English HBSC study	Morgan, A., Haglund, B. J. A.	2009	England	EU	6425	SES; Family activity; Parental emotional support; Parental promotion of autonomy	FAS; Family activities; Parental control	IV	Self-reported health; physical activity; smoking; drinking	Self-reported health; physical activity; smoking; drinking	Sectional
123	1	Parents, teachers and peer relations as predictors of risk behaviors and mental well-being among immigrant and Israeli born adolescents	Walsh, S. D., Harel-Fisch, Y., Fogel-Grinvald, H.	2010	Ireland	EU	7866	Immigrant status; Communication with parents; Family activity; Parental monitoring; School-related parental support	Immigrant status; Communication with parents; Family activity; Parental monitoring; School-related parental support	IV and moderator	Health risk behaviours; Wellbeing	Smoking; Drinking; HBSC Symptoms Checklist	Sectional	Immigrant status -- moderator; Relationship with parents --IV
142	1	What is worse? A hierarchy of family-related risk factors predicting alcohol use in adolescence	Kuntsche, E. N., Kuendig, H.	2006	Switzerland	EU	3127	Family Structure; Family drinking; Family communication; Family activity; Family support	Family Structure; Perception of excessive drinking in the family; Family communication; Family activity; Family support	IV	alcohol use	Frequency of alcoholic beverage intake; drunkenness	Sectional
152	1	Prevalence and familial predictors of suicidal behaviour among adolescents in Lithuania: a cross-sectional survey 2014	Zaborskis, A., Sirvyte, D., Zemaitiene, N.	2016	Lithuania	EU	2542	SES; Family structure; Family communication; Satisfaction with family relationships; Parental monitoring; Emotional support; School-related parental support; Parenting style; Family activity; Electronic media communication with parents; Seeing the parents	FAS; Household composition; Communication with Parents; Family Dynamics Measure; Satisfaction with family relationships; Parental monitoring; Parental bonding; parental disciplinary styles; Family activities; Electronic media communication with parents; Seeing the parents	IV	Suicide and self-harm	Youth Risk Behaviour Survey	Sectional
154	1	Does social capital travel? Influences on the life satisfaction of young people living in England and Spain	Morgan, A. R., Rivera, F., Moreno, C., Haglund, B. J. A.	2012	multiple(N=2)	EU	3591	Family activity; Parental promotion of autonomy; parental emotional support	Family activities; Parental Autonomy and Control; Parental social support	IV	Life satisfaction	Life satisfaction item	Sectional
172	1	Self-harm in adolescence: protective health assets in the family, school and community	Klemera, E., Brooks, F. M., Chester, K. L., Magnusson, J., Spencer, N.	2017	England	EU	1521	Communication with parents; family activity; Parental promotion of autonomy; Family support	Communication with parents; family activites; Personal autonomy in relation to family; Family support	IV	Self-harm	Self-harm	Sectional
195	1	Parent-Child Relationships and Adolescents' Life Satisfaction Across the First Decade of the New Millennium	Jimenez-Iglesias, A., Garcia-Moya, I., Moreno, C.	2017	Spain	EU	46593	Parental emotional support; Communication with parents; Parental monitoring; family activity	Parental Bonding Instrument–Brief Current form ; Communication with parents; Parental monitoring; family activities	IV	Life satisfaction	Life satisfaction	Trend
202	1	Analysis of the importance of family in the development of sense of coherence during adolescence	García Moya, I., Moreno, C., Jiménez Iglesias, A., Rivera, F., Lindström, B.	2012	Spain	EU	7580	SES; parental emonitional support ; Parental monitoring; Communication with parents; Satisfaction with relationship between parents; Family activity	Family affluence; Parental Bonding Instrument ; Parental monitoring; Communication with parents; Quality of the relationship between parents; Frequency of family activities	IV	Sense of Coherence	Sense of coherence scale	Sectional

## Sheet: FamilyMeals
synthesis of articles that focused on family meals activity
New ID	Decision	Title	Authors	Publication Year	Country	Area	Sample size	Family Variable	Measurement for family	Family role (IV/Mediator/Moderator)	Children's health outcomes	Measurements for children	Design (Sectional/Trend)	Note
79	1	Adolescent risk behaviours and mealtime routines: does family meal frequency alter the association between family structure and risk behaviour?	Levin, K. A., Kirby, J., Currie, C.	2012	Scotland	EU	4257	Family structure; family meals	Household composition; family mealtime	IV	Health risk behaviour	Substance use; sex	Sectional
101	1	Associations between socioeconomic and family determinants and weight-control behaviours among adolescents	Tur-Sinai, A., Kolobov, T., Tesler, R., Baron-Epel, O., Dvir, K., Harel-Fisch, Y.	2020	Israel	ME	4390	SES; communication with parents; family support; parental monitoring; family meals	FAS; subjective family wealth; communication with parents; family support; parental monitoring; family meal	IV	Weight-control behaviours	Weight-control behaviours	Sectional
103	1	Alcohol consumption in adolescence: the role of adolescents? gender, parental control, and family dinners attendance in an Italian HBSC sample	Perasso, G., Carone, N., Barone, L., Celata, C., Coppola, L., Baggio, B., Velasco, V., Lavatelli, M., Gelmi, G., Biffi, L., Marella, M., Pellegrini, C., Perego, O., De Agostini, W., Benedusi, M., Duregon, P., Meconi, A., Zagheno, C., Salinetti, M. V., Salada, M., Mauri, E., Drusetta, V., Use, L. A., Giannellini, A., Di Cosimo, F., Peruzzo, L., Rocco, T. G., Sala, J., Zoppi, C., Artioli, B., Stamp…	2019	Italy	EU	906	Parental monitoring; Family meals	Parental monitoring; Family dinners frequency	mediatior and moderator	Alcohol use	alcohol consumption frequency	Sectional	family control-med; family meal- mod; mod is not sig
184	1	Adolescent toothbrushing and the home environment: sociodemographic factors, family relationships and mealtime routines and disorganisation	Levin, K. A., Currie, C.	2010	Scotland	EU	6190	Family structure; SES; Satisfaction with family relationships; Family meals	Household composition; number of siblings; have (not) the second home; FAS; Parental employment; Contact with parents; Perceived parenting; Comunication with parents/siblings; Family evening meal	IV	Tooth brushing	Tooth brushing	Sectional
212	1	Soft drink consumption in adolescence: associations with food-related lifestyles and family rules in Belgium Flanders and the Veneto Region of Italy	Verzeletti, C., Maes, L., Santinello, M., Vereecken, C. A.	2010	Belgium	EU	14407	family meals; soft-drink-related parental rules	daily breakfast with parents; daily evening dinner with parents; soft-drink-related parental rules	IV	Soft drink consumption	Soft drink consumption	Sectional
224	1	Weight concerns among adolescent boys	Kelly, C., Fitzgerald, A., Sentenac, M., Gakewski, J., Molcho, M., Nic Gabhainn, S.	2016	Ireland	EU	6187	Family meals; Communication with parents; SES; Family structure	Breakfast with family; Communication with parents; Maternal employment; Family structure	IV	Weight concerns	Weight concerns	Sectional
236	1	Do social support and eating family meals together play a role in promoting resilience to bullying and cyberbullying in Scottish school children?	Shaw, R. J., Currie, D. B., Smith, G. S., Brown, J., Smith, D. J., Inchley, J. C.	2019	Scotland	EU	2581	Family meals	Family meals	IV and moderator	subjective wellbeing		Sectional	family meal: moderator for cyberbullying experience, but not sig
245		Food-related family lifestyle associated with fruit and vegetable consumption among young adolescents in Belgium Flanders and the Veneto Region of Italy	Verzeletti, C., Maes, L., Santinello, M., Baldassari, D., Vereecken, C. A.	2010	multiple(N=2)	EU	14407	SES;family meals; eating-related parental rules	FAS; Dinner with family; Family rules of eating	IV	Fruit/vegetable consumption	Fruit/vegetable consumption	Sectional
247		Eating Breakfast and Family Meals in Adolescence: The Role of Body Image	Ramseyer Winter, V., Jones, A., O’Neill, E.	2019	US	NA	12642	family meals	meals with parents	IV	Body image	Self body image	Sectional

## Sheet: FamilyPA
synthesis of articles that focused on family physical activity
New ID	Decision	Title	Authors	Publication Year	Country	Area	Sample size	Family Variable	Measurement for family	Family role (IV/Mediator/Moderator)	Children's health outcomes	Measurements for children	Design (Sectional/Trend)	Note
287		Joint Physical Custody and Adolescents' Life Satisfaction in 37 North American and European CountriesPalabras clave(sic)(sic)(sic)	Steinbach, A., Augustijn, L., Corkadi, G.	2021	multiple(N=37)	EU+NA	92886	physical custody arrangement	physical custody arrangement	IV	Life satisfaction	Life satisfaction	Sectional
170	1	Association between potential parental and peers' correlates and physical activity recommendations compliance among 13-16 years old adolescents	Bakalar, P., Kopcakova, J., Geckova, A. M.	2019	Slovakia	EU	3012	Parental physical activity; Family Physical activity	Parental physical activity; Family physical activity	IV	Moderate to vigorous physical activity; Organized sport; Screen-based behaviors	Moderate to vigorous physical activity; Organized sport; Screen-based behaviors	Sectional

## Sheet: AllFamilyActivity
synthesis of all articles that included family activity(ies)
New ID	Decision	Title	Authors	Publication Year	Country	Area	Sample size	Family Variable	Measurement for family	Family role (IV/Mediator/Moderator)	Children's health outcomes	Measurements for children	Design (Sectional/Trend)	Note
51	1	Family Social Environment and Parenting Predictors of Alcohol Use among Adolescents in Lithuania	Sumskas, L., Zaborskis, A.	2017	Lithuania	EU	3715	Family structure; SES; Satisfaction with family relationships; Communication with parents; Parental monitoring; Family communication; school-related parental support; Parental emotional support; Parenting style; Family activity; Electronic media communication with parents; Seeing parents	Household composition; FAS; Satisfaction with family relationships; Communication with parents; Parental monitoring; Quality of communication with family; school-related parental support; Parental emotional support; Parenting style; Family time together; Electronic media communication with parents; Seeing parents	IV	Weekly alcohol use	Weekly alcohol use	Sectional
58	1	EXPERIENCE OF CZECH CHILDREN WITH ALCOHOL CONSUMPTION IN RELATION TO SELECTED FAMILY INDICATORS	Hodacova, L., Smejkalova, J., Cermakova, E., Kalman, M.	2017	Czech	EU	4293	Family structure; family activity; communication with parents	Household composition; time with family; communication with parents	IV	alcohol consumption; experience of drunkenness	alcohol consumption; experience of drunkenness	Sectional
106	1	The Associations between Family-Related Factors and Excessive Internet Use in Adolescents	Faltynkova, A., Blinka, L., Sevcikova, A., Husarova, D.	2020	Slovakia	EU	2547	SES; family structure; parental emotional support; Parental promotion of autonomy; Parental monitoring ; Family activity; communication with parents	Subjective family wealth; Household compostion; Parental Bonding Instrument; Parental monitoring; Family activities; communication with parents	IV	Excessive Internet Use	Excessive Internet Use scale	Sectional
108	1	The Role of the Family in Promoting Responsible Substance Use in Adolescence	Jimenez-Iglesias, A., Moreno, C., Rivera, F., Garcia-Moya, I.	2013	Spain	EU	14825	Parental emotional support; Parental Promotion of Autonomy; Family Activity; Parental monitoring; Sources of parental knowledge	Parental Bonding Inventory-Brief Current Form; Family Activities; Parental monitoring; Perceived Sources of Parental Knowledge	IV and moderator	Substance Use	cigarette/alcohol/cannabis use	Sectional
109	1	What family dimensions are important for health-related quality of life in adolescence?	Jimenez-Iglesias, A., Moreno, C., Ramos, P., Rivera, F.	2015	Spain	EU	14825	Parental emotional support; Parental Promotion of Autonomy; Family Activity; Parental monitoring; Sources of Parental Knowledge	Parental Bonding Inventory-Brief Current Form; Family Activities; Parental monitoring; Perceived Sources of Parental Knowledge	IV and moderator	Health-related quality of life	KIDSCREEN-10 index questionnaire	Sectional
122	1	Social capital does matter for adolescent health: evidence from the English HBSC study	Morgan, A., Haglund, B. J. A.	2009	England	EU	6425	SES; Family activity; Parental emotional support; Parental promotion of autonomy	FAS; Family activities; Parental control	IV	Self-reported health; physical activity; smoking; drinking	Self-reported health; physical activity; smoking; drinking	Sectional
123	1	Parents, teachers and peer relations as predictors of risk behaviors and mental well-being among immigrant and Israeli born adolescents	Walsh, S. D., Harel-Fisch, Y., Fogel-Grinvald, H.	2010	Ireland	EU	7866	Immigrant status; Communication with parents; Family activity; Parental monitoring; School-related parental support	Immigrant status; Communication with parents; Family activity; Parental monitoring; School-related parental support	IV and moderator	Health risk behaviours; Wellbeing	Smoking; Drinking; HBSC Symptoms Checklist	Sectional	Immigrant status -- moderator; Relationship with parents --IV
142	1	What is worse? A hierarchy of family-related risk factors predicting alcohol use in adolescence	Kuntsche, E. N., Kuendig, H.	2006	Switzerland	EU	3127	Family Structure; Family drinking; Family communication; Family activity; Family support	Family Structure; Perception of excessive drinking in the family; Family communication; Family activity; Family support	IV	alcohol use	Frequency of alcoholic beverage intake; drunkenness	Sectional
152	1	Prevalence and familial predictors of suicidal behaviour among adolescents in Lithuania: a cross-sectional survey 2014	Zaborskis, A., Sirvyte, D., Zemaitiene, N.	2016	Lithuania	EU	2542	SES; Family structure; Family communication; Satisfaction with family relationships; Parental monitoring; Emotional support; School-related parental support; Parenting style; Family activity; Electronic media communication with parents; Seeing the parents	FAS; Household composition; Communication with Parents; Family Dynamics Measure; Satisfaction with family relationships; Parental monitoring; Parental bonding; parental disciplinary styles; Family activities; Electronic media communication with parents; Seeing the parents	IV	Suicide and self-harm	Youth Risk Behaviour Survey	Sectional
154	1	Does social capital travel? Influences on the life satisfaction of young people living in England and Spain	Morgan, A. R., Rivera, F., Moreno, C., Haglund, B. J. A.	2012	multiple(N=2)	EU	3591	Family activity; Parental promotion of autonomy; parental emotional support	Family activities; Parental Autonomy and Control; Parental social support	IV	Life satisfaction	Life satisfaction item	Sectional
170	1	Association between potential parental and peers' correlates and physical activity recommendations compliance among 13-16 years old adolescents	Bakalar, P., Kopcakova, J., Geckova, A. M.	2019	Slovakia	EU	3012	Parental physical activity; Family activity	Parental physical activity; Family physical activity	IV	Moderate to vigorous physical activity; Organized sport; Screen-based behaviors	Moderate to vigorous physical activity; Organized sport; Screen-based behaviors	Sectional
172	1	Self-harm in adolescence: protective health assets in the family, school and community	Klemera, E., Brooks, F. M., Chester, K. L., Magnusson, J., Spencer, N.	2017	England	EU	1521	Communication with parents; family activity; Parental promotion of autonomy; Family support	Communication with parents; family activites; Personal autonomy in relation to family; Family support	IV	Self-harm	Self-harm	Sectional
195	1	Parent-Child Relationships and Adolescents' Life Satisfaction Across the First Decade of the New Millennium	Jimenez-Iglesias, A., Garcia-Moya, I., Moreno, C.	2017	Spain	EU	46593	Parental emotional support; Communication with parents; Parental monitoring; family activity	Parental Bonding Instrument–Brief Current form ; Communication with parents; Parental monitoring; family activities	IV	Life satisfaction	Life satisfaction	Trend
202	1	Analysis of the importance of family in the development of sense of coherence during adolescence	García Moya, I., Moreno, C., Jiménez Iglesias, A., Rivera, F., Lindström, B.	2012	Spain	EU	7580	SES; parental emonitional support ; Parental monitoring; Communication with parents; Satisfaction with relationship between parents; Family activity	Family affluence; Parental Bonding Instrument ; Parental monitoring; Communication with parents; Quality of the relationship between parents; Frequency of family activities	IV	Sense of Coherence	Sense of coherence scale	Sectional
79	1	Adolescent risk behaviours and mealtime routines: does family meal frequency alter the association between family structure and risk behaviour?	Levin, K. A., Kirby, J., Currie, C.	2012	Scotland	EU	4257	Family structure; family meals	Household composition; family mealtime	IV	Health risk behaviour	Substance use; sex	Sectional
101	1	Associations between socioeconomic and family determinants and weight-control behaviours among adolescents	Tur-Sinai, A., Kolobov, T., Tesler, R., Baron-Epel, O., Dvir, K., Harel-Fisch, Y.	2020	Israel	ME	4390	SES; communication with parents; family support; parental monitoring; family meals	FAS; subjective family wealth; communication with parents; family support; parental monitoring; family meal	IV	Weight-control behaviours	Weight-control behaviours	Sectional
103	1	Alcohol consumption in adolescence: the role of adolescents? gender, parental control, and family dinners attendance in an Italian HBSC sample	Perasso, G., Carone, N., Barone, L., Celata, C., Coppola, L., Baggio, B., Velasco, V., Lavatelli, M., Gelmi, G., Biffi, L., Marella, M., Pellegrini, C., Perego, O., De Agostini, W., Benedusi, M., Duregon, P., Meconi, A., Zagheno, C., Salinetti, M. V., Salada, M., Mauri, E., Drusetta, V., Use, L. A., Giannellini, A., Di Cosimo, F., Peruzzo, L., Rocco, T. G., Sala, J., Zoppi, C., Artioli, B., Stamp…	2019	Italy	EU	906	Parental monitoring; Family meals	Parental monitoring; Family dinners frequency	mediatior and moderator	Alcohol use	alcohol consumption frequency	Sectional
184	1	Adolescent toothbrushing and the home environment: sociodemographic factors, family relationships and mealtime routines and disorganisation	Levin, K. A., Currie, C.	2010	Scotland	EU	6190	Family structure; SES; Satisfaction with family relationships; Family meals	Household composition; number of siblings; have (not) the second home; FAS; Parental employment; Contact with parents; Perceived parenting; Comunication with parents/siblings; Family evening meal	IV	Tooth brushing	Tooth brushing	Sectional
212	1	Soft drink consumption in adolescence: associations with food-related lifestyles and family rules in Belgium Flanders and the Veneto Region of Italy	Verzeletti, C., Maes, L., Santinello, M., Vereecken, C. A.	2010	Belgium	EU	14407	family meals; soft-drink-related parental rules	daily breakfast with parents; daily evening dinner with parents; soft-drink-related parental rules	IV	Soft drink consumption	Soft drink consumption	Sectional
224	1	Weight concerns among adolescent boys	Kelly, C., Fitzgerald, A., Sentenac, M., Gakewski, J., Molcho, M., Nic Gabhainn, S.	2016	Ireland	EU	6187	Family meals; Communication with parents; SES; Family structure	Breakfast with family; Communication with parents; Maternal employment; Family structure	IV	Weight concerns	Weight concerns	Sectional
236	1	Do social support and eating family meals together play a role in promoting resilience to bullying and cyberbullying in Scottish school children?	Shaw, R. J., Currie, D. B., Smith, G. S., Brown, J., Smith, D. J., Inchley, J. C.	2019	Scotland	EU	2581	Family meals	Family meals	IV and moderator	subjective wellbeing		Sectional	family meal also moderated cyberbullying experience
245		Food-related family lifestyle associated with fruit and vegetable consumption among young adolescents in Belgium Flanders and the Veneto Region of Italy	Verzeletti, C., Maes, L., Santinello, M., Baldassari, D., Vereecken, C. A.	2010	multiple(N=2)	EU	14407	SES;family meals; eating-related parental rules	FAS; Dinner with family; Family rules of eating	IV	Fruit/vegetable consumption	Fruit/vegetable consumption	Sectional
247		Eating Breakfast and Family Meals in Adolescence: The Role of Body Image	Ramseyer Winter, V., Jones, A., O’Neill, E.	2019	US	NA	12642	family meals	meals with parents	IV	Body image	Self body image	Sectional
287		Joint Physical Custody and Adolescents' Life Satisfaction in 37 North American and European CountriesPalabras clave(sic)(sic)(sic)	Steinbach, A., Augustijn, L., Corkadi, G.	2021	multiple(N=37)	EU+NA	92886	physical custody arrangement	physical custody arrangement	IV	Life satisfaction	Life satisfaction	Sectional
