# Supplementary material for: Family Related Variables’ Influences on Adolescents’ Health Based on Health Behaviour in School-Aged Children Database, an AI-Assisted Scoping Review, and Narrative Synthesis
Source: Front Psychol. 2022 Aug 10;13:871795. doi: 10.3389/fpsyg.2022.871795 (PMC9400839; doi:10.3389/fpsyg.2022.871795)
Supplement: Supplementary file 13 [file Table_12.XLSX]

## Sheet: CommunicationSibling
Sythesis of articles measuring the relationship between sibling communication and adolescents' health outcomes
New ID	Decision	Title	Authors	Publication Year	Country	Area	Sample size	Family Variable	Measurement for family	Family role (IV/Mediator/Moderator)	Children's health outcomes	Measurements for children	Design (Sectional/Trend)	Note
96	1	The relationship between body mass index and unhealthy weight control behaviors among adolescents: The role of family and peer social support	Vander Wal, J. S.	2012	US	NA	4598	communication with parents; school-related parental support; Communication with siblings	communication with parents; school-related parental support; Communication with siblings	IV	Unhealthy weight control behaviors;Possible disordered eating behavior	Unhealthy weight control behaviors;Possible disordered eating behavior	Sectional
168	1	Irregular breakfast consumption in adolescence and the family environment: Underlying causes by family structure	Levin, K. A., Kirby, J.	2012	Scotland	EU	16406	Family structure; SES; Seeing parents; Perceived parenting; Communication with parents; Communication with siblings	Household composition; FAS; Contact with parents; Perceived parenting; Communication with parents; Communication with siblings	IV and moderator	Irregular breakfast consumption	Daily breakfast consumption	Sectional	Family structure was a moderator
260		Exploring Whether Talking With Parents, Siblings, and Friends Moderates the Association Between Peer Victimization and Adverse Psychosocial Outcomes	Hong, J. S., Zhang, S., Gonzalez-Prendes, A. A., Albdour, M.	2020	US	NA	12642	Family structure; SES; communication with parents; communication with siblings	Family structure; subjective family wealth; communication with parents; communication with siblings	IV and moderator	alcohol/tobacco use; delinquent friend affiliation; internalizing problems	alcohol/tobacco use; delinquent friend affiliation; HBSC Symptom Checklist	Sectional

## Sheet: NubmberSibling
Sythesis of articles measuring the relationship between the number of siblings and adolescents' health outcomes
New ID	Decision	Title	Authors	Publication Year	Country	Area	Sample size	Family Variable	Measurement for family	Family role (IV/Mediator/Moderator)	Children's health outcomes	Measurements for children	Design (Sectional/Trend)	Note
67	1	Associations between family structure and adolescents' food habits	Fismen, A. S., Smith, O. R. F., Samdal, O., Helleve, A., Haug, E.	2020	Norway	EU	4475	Family structure; SES	household compostion; siblings; FAS	IV	Food habits	vegetables/sweets/sugar-added soft drinks consumption	Sectional
184	1	Adolescent toothbrushing and the home environment: sociodemographic factors, family relationships and mealtime routines and disorganisation	Levin, K. A., Currie, C.	2010	Scotland	EU	6190	Family structure; SES; Satisfaction with family relationships; Family meals	Household composition; number of siblings; have (not) the second home; FAS; Parental employment; Contact with parents; Perceived parenting; Comunication with parents/siblings; Family evening meal	IV	Tooth brushing	Tooth brushing	Sectional
186	1	Family composition and age at menarche: Findings from the international Health Behaviour in School-aged Children study	Steppan, M., Whitehead, R., McEachran, J., Currie, C.	2019	multiple(N=41)	Global	213595	Family member; family wealth	household compostion; FAS; siblings	IV and mediator	Age of menarche	Age of menarche	Sectional	FAS-IV; Family member-mediator
257		Socioeconomic disparities in diet vary according to migration status among adolescents in Belgium	Rouche, M., De Clercq, B., Lebacq, T., Dierckens, M., Moreau, N., Desbouys, L., Godin, I., Castetbon, K.	2019	Belgium	EU	19172	Immigrant status; SES; Family structure	Immigrant status; Family affluence; Parental employment; Household composition; Siblings	IV and moderator	Food Frequency	Food Frequency Scale	Sectional	Immigrant status -- moderator

## Sheet: AllSibling
Sythesis of articles measuring the relationship between siblings and adolescents' health outcomes
New ID	Decision	Title	Authors	Publication Year	Country	Area	Sample size	Family Variable	Measurement for family	Family role (IV/Mediator/Moderator)	Children's health outcomes	Measurements for children	Design (Sectional/Trend)	Note
96	1	The relationship between body mass index and unhealthy weight control behaviors among adolescents: The role of family and peer social support	Vander Wal, J. S.	2012	US	NA	4598	communication with parents; school-related parental support; Communication with siblings	communication with parents; school-related parental support; Communication with siblings	IV	Unhealthy weight control behaviors;Possible disordered eating behavior	Unhealthy weight control behaviors;Possible disordered eating behavior	Sectional
168	1	Irregular breakfast consumption in adolescence and the family environment: Underlying causes by family structure	Levin, K. A., Kirby, J.	2012	Scotland	EU	16406	Family structure; SES; Seeing parents; Perceived parenting; Communication with parents; Communication with siblings	Household composition; FAS; Contact with parents; Perceived parenting; Communication with parents; Communication with siblings	IV and moderator	Irregular breakfast consumption	Daily breakfast consumption	Sectional	Family structure was a moderator
260		Exploring Whether Talking With Parents, Siblings, and Friends Moderates the Association Between Peer Victimization and Adverse Psychosocial Outcomes	Hong, J. S., Zhang, S., Gonzalez-Prendes, A. A., Albdour, M.	2020	US	NA	12642	Family structure; SES; communication with parents; communication with siblings	Family structure; subjective family wealth; communication with parents; communication with siblings	IV and moderator	alcohol/tobacco use; delinquent friend affiliation; internalizing problems	alcohol/tobacco use; delinquent friend affiliation; HBSC Symptom Checklist	Sectional
67	1	Associations between family structure and adolescents' food habits	Fismen, A. S., Smith, O. R. F., Samdal, O., Helleve, A., Haug, E.	2020	Norway	EU	4475	Family structure; SES	household compostion; siblings; FAS	IV	Food habits	vegetables/sweets/sugar-added soft drinks consumption	Sectional
184	1	Adolescent toothbrushing and the home environment: sociodemographic factors, family relationships and mealtime routines and disorganisation	Levin, K. A., Currie, C.	2010	Scotland	EU	6190	Family structure; SES; Satisfaction with family relationships; Family meals	Household composition; number of siblings; have (not) the second home; FAS; Parental employment; Contact with parents; Perceived parenting; Comunication with parents/siblings; Family evening meal	IV	Tooth brushing	Tooth brushing	Sectional
186	1	Family composition and age at menarche: Findings from the international Health Behaviour in School-aged Children study	Steppan, M., Whitehead, R., McEachran, J., Currie, C.	2019	multiple(N=41)	Global	213595	Family member; family wealth	household compostion; FAS; siblings	IV and mediator	Age of menarche	Age of menarche	Sectional	FAS-IV; Family member-mediator
257		Socioeconomic disparities in diet vary according to migration status among adolescents in Belgium	Rouche, M., De Clercq, B., Lebacq, T., Dierckens, M., Moreau, N., Desbouys, L., Godin, I., Castetbon, K.	2019	Belgium	EU	19172	Immigrant status; SES; Family structure	Immigrant status; Family affluence; Parental employment; Household composition; Siblings	IV and moderator	Food Frequency	Food Frequency Scale	Sectional	Immigrant status -- moderator
